# Supplementary material for: High-Throughput Sequencing to Investigate lncRNA-circRNA-miRNA-mRNA Networks Underlying the Effects of Beta-Amyloid Peptide and Senescence on Astrocytes
Source: Front Genet. 2022 May 12;13:868856. doi: 10.3389/fgene.2022.868856 (PMC9133720; doi:10.3389/fgene.2022.868856)
Supplement: Supplementary file 4 [file Table4.XLSX]

## Sheet: lncRNA
transcript_id	transcript_name	gene_id	gene_name	transcript_locus	x12_FPKM	x90_FPKM	log2FoldChange	pvalue	padj
ENSRNOT00000088309	AABR07033720.1-201	ENSRNOG00000061472	AABR07033720.1	11:37458731-37599408	0	2.39491	-16.8814	2.9205e-16	1.83899e-13
TCONS_00373404	LINC7939	XLOC_296254	XLOC_296254	8:28842480-29080231	0	1.44949	-16.9143	1.10801e-15	6.30895e-13
ENSRNOT00000087936	AABR07050265.1-201	ENSRNOG00000052537	AABR07050265.1	5:158641305-158735262	0	2.89882	-16.5771	1.91624e-15	1.04656e-12
TCONS_00348143	LINC7424	XLOC_276589	XLOC_276589	7:571217-711231	0.936716	0	16.3442	1.06873e-13	4.61305e-11
TCONS_00239164	Slc28a2-OT1	ENSRNOG00000028668	Slc28a2	3:114333477-114600277	0	0.814635	-16.2451	1.50488e-13	6.29264e-11
TCONS_00032763	LINC817	XLOC_025180	XLOC_025180	1:121793607-122072166	0	0.70491	-16.1017	4.13851e-13	1.62872e-10
TCONS_00032786	LINC828	XLOC_025199	XLOC_025199	1:121992580-122219543	0	0.769053	-15.9361	9.46385e-13	3.51759e-10
TCONS_00032799	LINC836	XLOC_025209	XLOC_025209	1:122063539-122299404	0	1.06854	-16.4516	2.20345e-12	7.70819e-10
TCONS_00032766	LINC820	XLOC_025183	XLOC_025183	1:121801388-121996609	0	1.05998	-16.1662	3.48448e-12	1.16562e-09
TCONS_00032515	LINC762	XLOC_024985	XLOC_024985	1:119225894-119477011	0	0.607324	-15.7355	1.12937e-11	3.59805e-09
TCONS_00015992	AABR07005886.1-OT1	ENSRNOG00000053539	AABR07005886.1	1:204087009-204161100	1.08813	0	15.6293	1.75336e-11	5.30199e-09
TCONS_00032844	LINC851	XLOC_025243	XLOC_025243	1:122181964-122275899	0	1.4473	-15.5786	2.82186e-11	8.25323e-09
TCONS_00342665	Oxr1-OT1	ENSRNOG00000056487	Oxr1	7:80351765-80555451	0	0.633925	-15.507	4.07249e-11	1.13487e-08
TCONS_00331303	LINC6995	XLOC_263480	XLOC_263480	6:77864292-78119986	0.239983	0	15.2428	3.07724e-10	7.25564e-08
TCONS_00004022	LINC89	XLOC_003235	XLOC_003235	1:51171757-51303529	0	0.807602	-15.2308	3.87068e-10	9.0074e-08
TCONS_00362688	LINC7743	XLOC_287938	XLOC_287938	8:28842383-29035721	0	0.532708	-15.1828	4.86266e-10	1.11701e-07
TCONS_00032853	LINC832	XLOC_025201	XLOC_025201	1:122199513-122285595	0	1.21921	-15.206	1.07213e-09	2.29535e-07
TCONS_00345517	AC096473.3-OT1	ENSRNOG00000055700	AC096473.3	7:120404146-120458522	0	1.97046	-15.2377	1.09584e-09	2.33677e-07
TCONS_00118259	LINC2703	XLOC_090227	XLOC_090227	14:88379439-88488932	0.480298	0	15.0189	1.46075e-09	3.05405e-07
TCONS_00174474	LINC3852	XLOC_136919	XLOC_136919	18:37307706-37340547	0	3.07758	-15.1378	1.73755e-09	3.52269e-07
TCONS_00076102	LINC1695	XLOC_057272	XLOC_057272	11:31307971-31386774	0	1.12802	-14.9651	1.96615e-09	3.88318e-07
TCONS_00222411	ENSRNOG00000050998-AS1	XLOC_176132	XLOC_176132	20:4675485-4773940	0	0.941283	-15.0387	2.37147e-09	4.58225e-07
TCONS_00392235	LINC8346	XLOC_311187	XLOC_311187	9:120423972-120519420	0.518624	0	14.9072	3.79944e-09	6.87019e-07
TCONS_00032809	LINC830	XLOC_025200	XLOC_025200	1:122106682-122237031	0	0.629119	-14.8524	3.83335e-09	6.90817e-07
TCONS_00032814	LINC841	XLOC_025219	XLOC_025219	1:122111903-122149671	0	2.12473	-14.8202	5.07573e-09	8.9297e-07
TCONS_00255495	LINC5452	XLOC_201795	XLOC_201795	3:120885570-120955494	0.663559	0	14.8137	6.50386e-09	1.1051e-06
TCONS_00189810	Cd180-OT1	ENSRNOG00000010266	Cd180	2:32820315-32886906	0	1.16377	-14.762	7.88482e-09	1.31881e-06
TCONS_00032740	LINC814	XLOC_025157	XLOC_025157	1:121631932-121785665	0	0.950004	-15.6819	1.12729e-08	1.8442e-06
TCONS_00415217	AABR07037250.1-OT1	ENSRNOG00000039305	AABR07037250.1	X:17084052-17261895	0	0.448835	-14.8002	1.34338e-08	2.15275e-06
TCONS_00400455	ENSRNOG00000016196-AS7	XLOC_317594	XLOC_317594	9:118890361-119098859	0.191186	0	14.6097	1.43479e-08	2.27876e-06
TCONS_00032794	LINC835	XLOC_025205	XLOC_025205	1:122059406-122164728	0	0.714194	-14.715	1.59305e-08	2.51519e-06
TCONS_00066800	LINC1508	XLOC_049724	XLOC_049724	10:103198426-103202059	10.5376	0	14.5524	1.85545e-08	2.86195e-06
TCONS_00032747	LINC815	XLOC_025164	XLOC_025164	1:121688139-121743813	0	1.65768	-14.997	2.59765e-08	3.81962e-06
TCONS_00381944	Dock3-OT1	ENSRNOG00000014576	Dock3	8:115764338-115840750	0	0.911336	-14.6019	2.6051e-08	3.82008e-06
TCONS_00364545	AABR07070060.1-OT1	ENSRNOG00000052582	AABR07070060.1	8:46963108-47237329	0	0.327718	-14.9715	2.78214e-08	4.05744e-06
TCONS_00177353	LINC3916	XLOC_139312	XLOC_139312	18:75360948-75386919	0	2.49948	-14.5126	3.32802e-08	4.71232e-06
TCONS_00252901	RGD1309730-OT1	ENSRNOG00000037567	RGD1309730	3:91086099-91183272	0.360571	0	14.4309	3.79507e-08	5.28967e-06
ENSRNOT00000093536	AABR07037436.1-202	ENSRNOG00000049908	AABR07037436.1	X:20772141-20866201	0	0.649386	-14.4356	4.67956e-08	6.2773e-06
TCONS_00099616	LINC2271	XLOC_075470	XLOC_075470	13:50599213-50636163	4.70571	0	16.7288	4.83743e-08	6.44064e-06
TCONS_00075298	AABR07033287.1-OT3	ENSRNOG00000055793	AABR07033287.1	11:15760276-15950580	0	0.334285	-14.4949	5.63979e-08	7.4533e-06
TCONS_00122387	Thtpa-OT3	ENSRNOG00000018105	Thtpa	15:33713081-33759115	0	1.81081	-14.8501	6.75402e-08	8.64822e-06
TCONS_00236733	Lrrc4c-OT1	ENSRNOG00000029798	Lrrc4c	3:86246593-86343473	0	1.07997	-15.1726	9.53451e-08	1.14678e-05
TCONS_00394401	LINC8409	XLOC_312862	XLOC_312862	9:32886753-33047376	0	0.324278	-14.1948	1.09962e-07	1.29352e-05
TCONS_00032788	LINC829	XLOC_025200	XLOC_025200	1:122029648-122107918	0	0.723101	-14.3008	1.36304e-07	1.57228e-05
TCONS_00084779	Mphosph9-OT2	ENSRNOG00000001074	Mphosph9	12:37705407-37770696	0	0.783325	-14.1756	1.37916e-07	1.58406e-05
TCONS_00399590	LOC100362040-OT3	ENSRNOG00000030738	LOC100362040	9:100660423-100720689	0.505204	0	14.2041	1.43421e-07	1.63674e-05
TCONS_00179845	LINC3978	XLOC_141316	XLOC_141316	19:26454476-26520404	0	0.849419	-14.2827	1.82357e-07	2.04191e-05
TCONS_00230019	LINC4994	XLOC_181591	XLOC_181591	20:42409420-42501996	0.325105	0	14.2344	1.88752e-07	2.10033e-05
TCONS_00083638	Serpine1-OT1	ENSRNOG00000001414	Serpine1	12:22639167-22651482	58.0509	4.51347	4.49803	2.02411e-07	2.23374e-05
TCONS_00221456	LINC4844	XLOC_175586	XLOC_175586	2:262835491-262913906	0	0.608338	-14.0739	2.32569e-07	2.5352e-05
TCONS_00046786	ENSRNOG00000021902-AS1	XLOC_035578	XLOC_035578	10:4870783-4910333	0	1.24859	-14.1158	2.51815e-07	2.70098e-05
TCONS_00259786	LINC5558	XLOC_205163	XLOC_205163	3:171672961-171743578	0	0.658662	-14.0256	2.84535e-07	3.02166e-05
TCONS_00134587	Gpr183-OT4	ENSRNOG00000025094	Gpr183	15:108284694-108433878	0.209892	0	14.2325	2.87138e-07	3.04326e-05
TCONS_00071233	LINC1615	XLOC_053200	XLOC_053200	11:57588106-57707636	0	0.408064	-14.088	2.92475e-07	3.0876e-05
TCONS_00151418	LINC3295	XLOC_118076	XLOC_118076	17:13860835-13948964	2.66761	0	17.2122	3.29096e-07	3.42689e-05
TCONS_00274973	LINC5850	XLOC_217641	XLOC_217641	4:8784208-8876958	0.102945	7.53439	-5.41484	3.72145e-07	3.84523e-05
TCONS_00234446	LINC5090	XLOC_185012	XLOC_185012	3:53722758-53759742	0	1.23778	-14.0075	3.98896e-07	4.09791e-05
TCONS_00168109	LINC3709	XLOC_131602	XLOC_131602	18:38908156-38971619	0	0.691294	-13.9413	4.1119e-07	4.20003e-05
TCONS_00091891	LINC2096	XLOC_069146	XLOC_069146	13:38492938-38575803	0	0.594766	-14.098	4.13312e-07	4.21366e-05
TCONS_00376199	LINC8006	XLOC_298581	XLOC_298581	8:54508498-54590733	0.404212	0	14.3027	5.35703e-07	5.30971e-05
TCONS_00283916	LINC6008	XLOC_225144	XLOC_225144	4:146477625-146542271	0	0.726822	-14.0338	6.20237e-07	6.06891e-05
TCONS_00376211	LINC8011	XLOC_298581	XLOC_298581	8:54520392-54590733	0.350077	0	13.8918	6.44192e-07	6.23492e-05
TCONS_00076104	ENSRNOG00000028658-AS5	XLOC_057272	XLOC_057272	11:31307971-31430559	0	0.323773	-13.7963	7.14903e-07	6.77235e-05
TCONS_00371346	LINC7909	XLOC_294673	XLOC_294673	8:131628103-131712421	0	0.452944	-13.7458	7.72996e-07	7.25843e-05
TCONS_00206937	LINC4510	XLOC_163409	XLOC_163409	2:38665846-38684369	0	2.05459	-13.734	9.46748e-07	8.64724e-05
TCONS_00084553	ENSRNOG00000000963-AS1	XLOC_063980	XLOC_063980	12:33016669-33130684	0	0.379547	-13.9109	9.82527e-07	8.90025e-05
TCONS_00396383	LOC108351936-OT2	ENSRNOG00000021406	LOC108351936	9:64643518-64843953	0.123746	0	13.9374	1.00939e-06	9.12591e-05
TCONS_00156833	AABR07028816.1-OT1	ENSRNOG00000048958	AABR07028816.1	17:86745144-87028032	0.0760393	0	13.7025	1.08433e-06	9.67275e-05
TCONS_00126052	LINC2845	XLOC_096728	XLOC_096728	15:95230416-95290014	0.352605	0	13.6791	1.13466e-06	0.00010013
TCONS_00155090	ENSRNOG00000046403-AS1	XLOC_121101	XLOC_121101	17:57692352-57782305	0	0.393165	-13.6363	1.13931e-06	0.00010013
TCONS_00362687	LINC7742	XLOC_287938	XLOC_287938	8:28842365-29090121	0.00195933	4.35279	-10.2784	1.22193e-06	0.000106191
TCONS_00321226	LINC6767	XLOC_255183	XLOC_255183	6:99613133-99625243	1.64034	0	13.6186	1.27293e-06	0.000110245
TCONS_00012004	LINC268	XLOC_009290	XLOC_009290	1:153791341-153860437	0.330788	0	13.8168	1.38539e-06	0.000119212
TCONS_00097592	LINC2219	XLOC_073699	XLOC_073699	13:7652177-7695295	0	0.839951	-13.6632	1.4546e-06	0.000123775
TCONS_00376186	LINC8002	XLOC_298581	XLOC_298581	8:54408187-54609243	0.156274	0	14.2706	1.49313e-06	0.000126052
ENSRNOT00000087610	AABR07001233.1-201	ENSRNOG00000053328	AABR07001233.1	1:38895131-39035633	0	0.262188	-13.7056	1.5175e-06	0.000127306
TCONS_00299277	Eif4g3-OT1	ENSRNOG00000014368	Eif4g3	5:156396695-156442577	0.448712	0	13.6335	1.54516e-06	0.000129221
TCONS_00101377	LINC2309	XLOC_076881	XLOC_076881	13:77191411-77262610	0.265253	0	13.5438	1.7214e-06	0.000141964
TCONS_00187637	LINC4110	XLOC_147385	XLOC_147385	2:3325165-3380121	0	0.715645	-13.7724	1.74774e-06	0.000143473
TCONS_00032848	LINC840	XLOC_025218	XLOC_025218	1:122186714-122239747	0	0.650039	-13.5962	1.80168e-06	0.000147448
TCONS_00047654	ENSRNOG00000033893-AS1	XLOC_036125	XLOC_036125	10:14778850-14824697	0	1.0617	-14.0748	1.85451e-06	0.000151079
TCONS_00045110	LINC1138	XLOC_034245	XLOC_034245	1:273818637-273852657	0	1.0413	-13.6252	1.89285e-06	0.000153502
TCONS_00149019	LINC3248	XLOC_116177	XLOC_116177	16:75763090-75800091	0.49221	0	13.4928	1.92259e-06	0.000155442
TCONS_00037502	Pdzd9-OT3	ENSRNOG00000016292	Pdzd9	1:190524980-190585638	0.351148	0	13.702	2.05572e-06	0.000164713
TCONS_00176827	LINC3906	XLOC_138872	XLOC_138872	18:70012158-70043461	0	1.21266	-13.7241	2.06482e-06	0.000165195
TCONS_00093889	ENSRNOG00000002863-AS1	XLOC_070727	XLOC_070727	13:72367712-72439228	0	0.541729	-13.7733	2.10539e-06	0.000167672
TCONS_00406630	LINC8723	XLOC_323096	XLOC_323096	X:28720806-28766939	0	0.7558	-13.6189	2.10832e-06	0.000167672
TCONS_00034748	Folh1-OT1	ENSRNOG00000013770	Folh1	1:150346111-150387766	0	0.787871	-13.526	2.28078e-06	0.000178211
TCONS_00092012	LINC2097	XLOC_069259	XLOC_069259	13:43049020-43172915	0.190883	0	13.8788	2.28551e-06	0.00017832
TCONS_00150545	LINC3282	XLOC_117442	XLOC_117442	17:3066316-3144761	0	0.426215	-13.5686	2.34186e-06	0.000181138
TCONS_00174455	LINC3849	XLOC_136900	XLOC_136900	18:37247958-37292754	0	0.730127	-13.5182	2.47655e-06	0.00018909
ENSRNOT00000086314	AABR07044668.1-201	ENSRNOG00000055480	AABR07044668.1	20:16531275-16636071	0	0.407448	-13.9029	2.52681e-06	0.000191833
ENSRNOT00000091080	AABR07044980.1-201	ENSRNOG00000061835	AABR07044980.1	20:30041461-30263742	0	0.15801	-13.6465	2.53647e-06	0.000192294
TCONS_00280524	LINC5949	XLOC_222278	XLOC_222278	4:106843360-106918995	0	0.476823	-13.6554	2.56374e-06	0.000194086
TCONS_00308577	Kank4-OT1	ENSRNOG00000007779	Kank4	5:117424667-117440543	1.12423	0	13.4663	3.03169e-06	0.000225056
TCONS_00005788	Obox2-OT1	ENSRNOG00000032891	Obox2	1:71727545-71804097	0	0.514816	-13.77	3.31745e-06	0.000242583
TCONS_00030138	ENSRNOG00000047364-AS2	XLOC_023232	XLOC_023232	1:88615782-88631766	1.03961	0	13.3464	3.62549e-06	0.000258844
TCONS_00382514	Arpp21-OT1	ENSRNOG00000008919	Arpp21	8:120442270-120491751	0.323437	0	13.2932	3.87215e-06	0.000274502
TCONS_00279999	LINC5938	XLOC_221873	XLOC_221873	4:96528310-96561724	0.476119	0	13.2771	4.45009e-06	0.000307729
TCONS_00013859	Olr245-OT1	ENSRNOG00000030215	Olr245	1:172230731-172295484	0	0.45541	-13.3633	4.46728e-06	0.000308519
TCONS_00228120	LINC4960	XLOC_180081	XLOC_180081	20:16742364-16820732	0	0.434892	-13.5823	4.544e-06	0.00031301
TCONS_00130139	LINC2908	XLOC_100074	XLOC_100074	15:39353970-39462507	0.158829	0	13.3676	4.82619e-06	0.00032948
TCONS_00264679	ENSRNOG00000013729-AS1	XLOC_209137	XLOC_209137	4:65911195-65962719	0	0.506822	-13.1961	5.43229e-06	0.000362535
ENSRNOT00000090803	LOC102553018-201	ENSRNOG00000057834	LOC102553018	2:251534907-251607676	45.7485	8.74279	3.19051	5.64893e-06	0.000373268
TCONS_00133374	Klf12-OT1	ENSRNOG00000009145	Klf12	15:84605186-84748525	0.141211	0	13.5805	5.71793e-06	0.000376434
TCONS_00209144	LINC4572	XLOC_165371	XLOC_165371	2:80741436-80769072	1.30298	0	14.3918	6.17801e-06	0.000397913
TCONS_00404947	Ndp-OT1	ENSRNOG00000002960	Ndp	X:6791136-6818129	0	0.91368	-13.116	6.39964e-06	0.000409233
TCONS_00244289	Stk4-OT3	ENSRNOG00000013529	Stk4	3:160515874-160546541	0.788615	0	13.9352	6.57549e-06	0.000418478
TCONS_00402918	ENSRNOG00000058941-AS1	XLOC_319896	XLOC_319896	KL568159.1:1295463-1373030	0	0.438787	-13.5597	6.69728e-06	0.000425106
TCONS_00335174	Prima1-OT1	ENSRNOG00000008915	Prima1	6:127075954-127127974	9.83032	1.01593	4.07854	6.87247e-06	0.00043428
TCONS_00020993	LOC100911660-OT3	ENSRNOG00000047692	LOC100911660	1:257616141-257903481	0	0.529239	-15.7238	6.91483e-06	0.000435928
TCONS_00198621	ENSRNOG00000010124-AS5	XLOC_156932	XLOC_156932	2:183213045-183313148	0	0.250922	-13.1351	7.06683e-06	0.000443421
TCONS_00208885	LINC4564	XLOC_165132	XLOC_165132	2:77633022-77666897	0.406099	0	13.0959	8.12943e-06	0.000498981
TCONS_00340524	LINC7260	XLOC_270699	XLOC_270699	7:54379127-54458541	0.175641	0	13.0866	8.4499e-06	0.000515694
TCONS_00090417	LINC2049	XLOC_067888	XLOC_067888	12:48863034-48915336	12.6554	1.46177	3.90988	9.57561e-06	0.000572643
TCONS_00382515	Arpp21-OT2	ENSRNOG00000008919	Arpp21	8:120443081-120491524	0.269924	0	12.9919	9.82148e-06	0.000584971
TCONS_00376173	LINC7999	XLOC_298581	XLOC_298581	8:54372360-54404173	0.456791	0	13.1285	9.94856e-06	0.000588555
TCONS_00097406	LINC2212	XLOC_073520	XLOC_073520	13:865387-922211	0	0.458671	-13.1882	1.0133e-05	0.000597956
TCONS_00028061	LINC602	XLOC_021855	XLOC_021855	1:63574357-63592219	0	1.29991	-13.0177	1.0948e-05	0.000634166
TCONS_00376210	LINC8012	XLOC_298581	XLOC_298581	8:54520392-54590733	0.175118	0	12.9344	1.10119e-05	0.000636488
TCONS_00415218	LINC8897	XLOC_330600	XLOC_330600	X:17084364-17138910	0	0.388058	-12.896	1.2006e-05	0.000685805
TCONS_00066178	ENSRNOG00000042524-AS1	XLOC_049258	XLOC_049258	10:94864430-94968671	0.118278	0	12.9178	1.2219e-05	0.000695002
TCONS_00358510	ENSRNOG00000055700-AS1	XLOC_285007	XLOC_285007	7:120404281-120458471	0	0.515406	-13.2996	1.24786e-05	0.000706016
TCONS_00103000	ENSRNOG00000038083-AS1	XLOC_078144	XLOC_078144	13:93835124-93889934	0.267684	0	13.16	1.2636e-05	0.000711914
TCONS_00215813	LINC4727	XLOC_171243	XLOC_171243	2:182115147-182217686	0	0.250795	-13.1606	1.26553e-05	0.00071225
TCONS_00355119	ENSRNOG00000004109-AS1	XLOC_282196	XLOC_282196	7:79753201-79817364	0	0.33422	-12.921	1.27402e-05	0.000716276
TCONS_00098370	LINC2239	XLOC_074430	XLOC_074430	13:32020100-32083461	0	0.371862	-13.0353	1.29198e-05	0.000724091
TCONS_00417915	LINC8947	XLOC_332999	XLOC_332999	X:59464655-59513733	0	0.594667	-13.3409	1.29647e-05	0.000725847
TCONS_00162199	LINC3590	XLOC_126778	XLOC_126778	17:58621380-58652743	0	0.681376	-12.9001	1.31498e-05	0.000733953
TCONS_00069803	LINC1588	XLOC_052093	XLOC_052093	11:31308165-31368461	0	0.355405	-12.9267	1.38657e-05	0.000766168
TCONS_00289898	ENSRNOG00000006328-AS1	XLOC_230164	XLOC_230164	5:33664352-33696497	0.354969	0	12.8205	1.40785e-05	0.000774435
TCONS_00323331	AABR07065353.1-OT3	ENSRNOG00000037891	AABR07065353.1	6:123185237-123577752	0	0.116989	-13.9838	1.43162e-05	0.000784283
TCONS_00212339	LINC4640	XLOC_168260	XLOC_168260	2:122337786-122362940	0.46598	0	12.8601	1.43646e-05	0.000786129
TCONS_00386615	LINC8217	XLOC_306733	XLOC_306733	9:48458963-48602957	0.315582	7.65993	-3.80887	1.45937e-05	0.000793483
TCONS_00032871	LINC854	XLOC_025265	XLOC_025265	1:122233436-122273650	0	0.677864	-13.247	1.46175e-05	0.000793483
TCONS_00406623	LINC8721	XLOC_323096	XLOC_323096	X:28711179-28902937	0	0.591259	-15.3296	1.50831e-05	0.00081627
TCONS_00038125	LINC1006	XLOC_029324	XLOC_029324	1:195810501-195853409	0	0.514582	-12.9434	1.5175e-05	0.000819586
TCONS_00419203	Zdhhc15-OT2	ENSRNOG00000002751	Zdhhc15	X:75540485-75566481	0	0.820751	-12.9041	1.52726e-05	0.000822371
TCONS_00135112	LINC3000	XLOC_104441	XLOC_104441	16:811972-833520	0	0.926114	-12.8197	1.54216e-05	0.000828727
TCONS_00386652	LINC8230	XLOC_306733	XLOC_306733	9:48631442-48756059	0.0650663	2.74336	-4.58901	1.57174e-05	0.000840183
TCONS_00036971	LINC952	XLOC_028439	XLOC_028439	1:180852592-180949273	0	0.213839	-12.8757	1.5738e-05	0.000840183
TCONS_00362828	LINC7746	XLOC_288076	XLOC_288076	8:29105451-29123110	0.002676	2.92281	-9.2122	1.57444e-05	0.000840183
TCONS_00394464	LINC8413	XLOC_312862	XLOC_312862	9:33081771-33122230	0	0.493141	-12.8023	1.58034e-05	0.000841639
TCONS_00038058	LINC1001	XLOC_029268	XLOC_029268	1:195030753-195064680	0	0.58852	-12.8048	1.5932e-05	0.000847641
TCONS_00389402	ENSRNOG00000013213-AS2	XLOC_308880	XLOC_308880	9:83249432-83277791	0.389797	0	12.7689	1.61569e-05	0.000858754
TCONS_00003683	Fndc1-OT1	ENSRNOG00000030210	Fndc1	1:47605219-47642120	15.7396	1.94232	3.82259	1.63306e-05	0.000865406
TCONS_00355921	LINC7615	XLOC_282932	XLOC_282932	7:94612349-94687072	0	0.338816	-13.1788	1.648e-05	0.000870741
TCONS_00033567	ENSRNOG00000013877-AS1	XLOC_025851	XLOC_025851	1:128610154-128629330	0	1.08254	-12.8691	1.7169e-05	0.000901803
TCONS_00122864	ENSRNOG00000008053-AS1	XLOC_093944	XLOC_093944	15:40390901-40467430	0.141377	0	12.7449	1.73915e-05	0.000910807
TCONS_00370481	Ltf-OT1	ENSRNOG00000031779	Ltf	8:119293510-119342974	0.244986	0	12.9044	1.76621e-05	0.000923171
TCONS_00215403	LINC4719	XLOC_170884	XLOC_170884	2:175622124-175652397	0.362858	0	12.7407	1.82368e-05	0.000949386
TCONS_00150483	LINC3274	XLOC_117403	XLOC_117403	17:2441400-2443637	4.74598	0	12.71	1.83418e-05	0.000951265
TCONS_00363914	LINC7759	XLOC_289057	XLOC_289057	8:38256029-38281302	0	0.746427	-12.7346	1.85176e-05	0.000959455
TCONS_00234436	LINC5084	XLOC_185012	XLOC_185012	3:53699350-53875161	0.11276	3.49179	-4.17485	1.92507e-05	0.000988427
TCONS_00024820	LINC531	XLOC_019117	XLOC_019117	1:24325024-24330488	0	3.50603	-12.7672	2.0783e-05	0.00105338
TCONS_00345372	RGD1309808-OT1	ENSRNOG00000047782	RGD1309808	7:118906617-118965866	0	0.313249	-12.6986	2.10761e-05	0.00106622
TCONS_00412630	LINC8839	XLOC_328421	XLOC_328421	X:125200570-125245483	0	0.443037	-12.7983	2.12026e-05	0.0010716
TCONS_00350176	LINC7508	XLOC_277988	XLOC_277988	7:18376096-18398683	0.454793	0	12.6609	2.13094e-05	0.00107396
TCONS_00272961	LINC5802	XLOC_215993	XLOC_215993	4:168551451-168568618	0.586669	0	12.6225	2.36687e-05	0.00116973
TCONS_00260751	LINC5576	XLOC_205901	XLOC_205901	4:2843229-2915999	0.138373	0	12.6378	2.52555e-05	0.00123223
TCONS_00188143	ENSRNOG00000053036-AS1	XLOC_147852	XLOC_147852	2:7620344-7679705	0	0.29168	-12.6004	2.58969e-05	0.00125779
TCONS_00028545	LINC612	XLOC_022154	XLOC_022154	1:70174020-70210291	0	0.480431	-12.6211	2.67793e-05	0.00129244
TCONS_00034709	LINC905	XLOC_026701	XLOC_026701	1:149465712-149485149	0	0.865553	-12.5605	2.76713e-05	0.0013283
TCONS_00275971	Sema3d-OT1	ENSRNOG00000007202	Sema3d	4:19321450-19413490	0	0.265955	-13.1124	3.11949e-05	0.00146204
TCONS_00262513	LINC5612	XLOC_207306	XLOC_207306	4:28774212-28824172	0	0.357579	-12.6472	3.26107e-05	0.001512
TCONS_00404387	LOC103694908-OT1	ENSRNOG00000058500	LOC103694908	KL568483.1:605-22840	0	0.907371	-12.8278	3.3255e-05	0.00153308
TCONS_00329678	LINC6960	XLOC_262007	XLOC_262007	6:54908316-54956007	0	0.357438	-12.5725	3.41943e-05	0.00157097
TCONS_00335175	Prima1-OT2	ENSRNOG00000008915	Prima1	6:127083361-127127413	0.205582	0	12.4703	3.4299e-05	0.00157443
TCONS_00071569	ENSRNOG00000060806-AS1	XLOC_053450	XLOC_053450	11:61845376-61884126	0	0.539091	-12.8565	3.44114e-05	0.00157823
TCONS_00342788	ENSRNOG00000004200-AS2	XLOC_272573	XLOC_272573	7:83670236-83777487	0	0.783219	-14.8822	3.55923e-05	0.00162266
TCONS_00102806	LINC2342	XLOC_077960	XLOC_077960	13:92807510-92886109	0	0.233286	-12.68	3.77538e-05	0.00170956
TCONS_00342789	ENSRNOG00000004200-AS3	XLOC_272573	XLOC_272573	7:83670258-83777487	0	1.00313	-15.2373	3.8457e-05	0.00173846
TCONS_00301439	ENSRNOG00000007590-AS1	XLOC_239220	XLOC_239220	5:4366334-4394353	0	0.563852	-12.4676	3.85969e-05	0.00174184
TCONS_00334077	LINC7057	XLOC_265785	XLOC_265785	6:114636512-114676894	0	0.376314	-12.4198	3.94007e-05	0.00176917
TCONS_00036974	LINC954	XLOC_028439	XLOC_028439	1:180856375-181168003	0.0691497	2.27183	-4.22216	3.97101e-05	0.00178156
TCONS_00393564	LINC8386	XLOC_312150	XLOC_312150	9:17505210-17520123	0.636481	0	12.5383	3.98126e-05	0.00178466
TCONS_00098335	LINC2236	XLOC_074396	XLOC_074396	13:31374120-31469893	0	0.172838	-12.5562	4.00027e-05	0.00179019
TCONS_00375088	LINC7973	XLOC_297816	XLOC_297816	8:45511705-45544347	0.276132	0	12.4866	4.07106e-05	0.00181883
TCONS_00032838	LINC848	XLOC_025228	XLOC_025228	1:122173114-122229715	0	0.367331	-12.8505	4.09577e-05	0.00182377
TCONS_00012472	LINC272	XLOC_009726	XLOC_009726	1:156397248-156440529	0.208168	0	12.4903	4.11998e-05	0.00183303
ENSRNOT00000083280	LOC102551339-201	ENSRNOG00000057440	LOC102551339	14:32855462-32897232	0.202171	0	12.3777	4.21768e-05	0.00186442
TCONS_00123589	LINC2804	XLOC_094513	XLOC_094513	15:51275890-51302333	0.364753	0	12.532	4.2184e-05	0.00186442
ENSRNOT00000076446	Rgma-202	ENSRNOG00000012874	Rgma	1:134715209-134741356	39.743	7.75223	3.16769	4.22326e-05	0.00186503
ENSRNOT00000093383	Supt5h-203	ENSRNOG00000032034	Supt5h	1:85437816-85460238	23.5297	3.20419	3.68013	4.23915e-05	0.0018705
TCONS_00122385	Thtpa-OT1	ENSRNOG00000018105	Thtpa	15:33713025-33759115	0	1.72398	-14.8218	4.25957e-05	0.00187488
TCONS_00111202	LINC2535	XLOC_084682	XLOC_084682	14:102901661-102916215	0.633242	0	12.4962	4.33154e-05	0.00190342
TCONS_00204229	ENSRNOG00000011980-AS1	XLOC_161196	XLOC_161196	2:265195973-265401473	0	0.388435	-14.7956	4.3482e-05	0.00190862
TCONS_00152538	ENSRNOG00000050767-AS2	XLOC_118962	XLOC_118962	17:27926912-27969426	0.277627	0	12.8035	4.43124e-05	0.00193769
TCONS_00047980	LINC1179	XLOC_036347	XLOC_036347	10:17018455-17046880	0	0.532225	-12.4058	4.47401e-05	0.00195161
TCONS_00091213	ENSRNOG00000014859-AS1	XLOC_068573	XLOC_068573	13:25191074-25262534	0.122463	0	12.4094	4.49061e-05	0.00195725
TCONS_00205994	LINC4493	XLOC_162704	XLOC_162704	2:28469861-28494023	0	0.632466	-12.4269	4.64557e-05	0.00200802
TCONS_00188600	LINC4138	XLOC_148252	XLOC_148252	2:13464342-13488531	0	0.606675	-12.3661	4.81851e-05	0.00206321
TCONS_00007961	Sbsn-OT1	ENSRNOG00000021015	Sbsn	1:89179889-89207344	0.303149	0	12.3458	4.85819e-05	0.00207522
TCONS_00032790	LINC833	XLOC_025202	XLOC_025202	1:122050798-122161573	0	0.66244	-14.712	4.88371e-05	0.0020828
TCONS_00380559	LINC8087	XLOC_302162	XLOC_302162	8:103035754-103059896	0	0.591847	-12.3261	4.93821e-05	0.00210102
TCONS_00348104	LINC7408	XLOC_276566	XLOC_276566	7:477743-487334	0	1.75642	-12.5601	5.18281e-05	0.00219115
TCONS_00310780	Zmym4-OT1	ENSRNOG00000012397	Zmym4	5:144946681-144996446	0.189199	0	12.4914	5.27746e-05	0.00222764
TCONS_00063341	Crlf3-OT1	ENSRNOG00000050657	Crlf3	10:67330349-67403125	0.112718	0	12.3121	5.62414e-05	0.00234623
ENSRNOT00000092568	Slc26a8-203	ENSRNOG00000000512	Slc26a8	20:5894128-5931648	0.221919	0	12.3737	5.70481e-05	0.00237617
TCONS_00077564	LINC1730	XLOC_058445	XLOC_058445	11:51953513-51975547	0	0.625195	-12.2842	5.7541e-05	0.00239298
TCONS_00069498	LINC1578	XLOC_051857	XLOC_051857	11:26820781-26850830	0	0.492532	-12.3774	5.99721e-05	0.00246725
ENSRNOT00000093578	Pclo-204	ENSRNOG00000005726	Pclo	4:16519487-17058921	0	0.129235	-14.5926	6.04263e-05	0.00248021
TCONS_00154280	LINC3369	XLOC_120399	XLOC_120399	17:49991286-50031546	0.224657	0	12.4354	6.16858e-05	0.0025261
TCONS_00069006	LINC1548	XLOC_051376	XLOC_051376	11:15731686-15753973	0	3.10696	-14.6284	6.31384e-05	0.00255818
TCONS_00069332	LINC1571	XLOC_051709	XLOC_051709	11:22136180-22156761	0	0.655594	-12.2448	6.38948e-05	0.0025825
TCONS_00289638	LINC6146	XLOC_229929	XLOC_229929	5:29870889-29912087	0.191189	0	12.2613	6.39877e-05	0.00258282
TCONS_00389052	LINC8287	XLOC_308710	XLOC_308710	9:80830357-80852920	0.375915	0	12.358	6.41394e-05	0.00258699
TCONS_00099626	LINC2273	XLOC_075470	XLOC_075470	13:50617963-50636160	0.421992	0	12.2228	6.45328e-05	0.00259531
TCONS_00191715	Drosha-OT2	ENSRNOG00000013451	Drosha	2:62887267-62896065	0.879779	0	12.2601	6.54952e-05	0.00262191
ENSRNOT00000076450	Dlg3-205	ENSRNOG00000002767	Dlg3	X:70596848-70648532	0	0.254494	-12.2115	6.78842e-05	0.00268939
TCONS_00402546	LINC8599	XLOC_319531	XLOC_319531	KL568156.1:693020-733041	0	0.36953	-12.3703	6.96546e-05	0.00274329
TCONS_00135294	LINC3001	XLOC_104620	XLOC_104620	16:1065816-1209936	0	0.438368	-14.4892	7.11799e-05	0.00279303
TCONS_00413350	NEWGENE_1565644-OT1	ENSRNOG00000003409	NEWGENE_1565644	X:144699761-144876430	0	0.536241	-15.0528	7.12308e-05	0.00279303
TCONS_00071763	Arhgap31-OT1	ENSRNOG00000003088	Arhgap31	11:64609328-64701155	0	0.727367	-14.5286	7.24903e-05	0.00282586
TCONS_00340090	LINC7257	XLOC_270317	XLOC_270317	7:46189916-46233054	0	0.318653	-12.2697	7.3191e-05	0.00284695
TCONS_00014411	LINC336	XLOC_011216	XLOC_011216	1:180882211-181170256	1.96289	0	18.3599	7.4941e-05	0.00290236
TCONS_00038054	Snurf-OT1	ENSRNOG00000054391	Snurf	1:195026642-195324310	0.0740003	1.85808	-3.87085	7.61053e-05	0.0029326
ENSRNOT00000076385	AABR07021544.1-201	ENSRNOG00000049537	AABR07021544.1	13:77784808-77819211	12.3216	1.64702	3.71043	7.72847e-05	0.0029695
TCONS_00208362	LOC499541-OT2	ENSRNOG00000030171	LOC499541	2:61697768-61716011	0.382446	0	12.0958	8.40966e-05	0.00318099
TCONS_00125785	LINC2835	XLOC_096485	XLOC_096485	15:88036967-88059210	0.000726333	1.29411	-9.8579	8.47951e-05	0.00320063
TCONS_00103966	LINC2370	XLOC_078928	XLOC_078928	13:104824228-104851593	0.259984	0	12.1494	8.60679e-05	0.00324181
TCONS_00229381	LINC4987	XLOC_181093	XLOC_181093	20:31994679-32011565	0.428522	0	12.1558	8.8494e-05	0.00332081
TCONS_00180955	LINC4000	XLOC_142135	XLOC_142135	19:43097161-43105367	0	1.4326	-12.0552	8.91437e-05	0.00333653
TCONS_00201811	Dpyd-OT1	ENSRNOG00000017105	Dpyd	2:222052644-222080942	0	0.438699	-12.1307	9.17336e-05	0.0034152
TCONS_00012002	LINC267	XLOC_009290	XLOC_009290	1:153791298-153823066	0.224391	0	12.1484	9.37717e-05	0.00347612
TCONS_00273456	Golt1b-OT1	ENSRNOG00000058386	Golt1b	4:176606649-176619710	0.549692	0	12.1563	9.37824e-05	0.00347612
TCONS_00223223	Adarb1-OT3	ENSRNOG00000001227	Adarb1	20:11972381-12064165	0.347048	0	14.3197	9.90177e-05	0.00363992
TCONS_00032872	LINC831	XLOC_025200	XLOC_025200	1:122235772-122269175	0	0.346485	-12.0211	9.92563e-05	0.00364325
TCONS_00365164	LINC7804	XLOC_290029	XLOC_290029	8:54590500-54631559	0.177317	0	12.1674	0.000103149	0.0037685
TCONS_00361337	LINC7722	XLOC_287004	XLOC_287004	8:5546879-5570560	0	0.679085	-12.4911	0.000103784	0.00378911
TCONS_00245396	LINC5283	XLOC_194045	XLOC_194045	3:171436256-171446302	0.630927	0	11.9611	0.000104508	0.00381293
TCONS_00147942	LINC3226	XLOC_115258	XLOC_115258	16:62950837-62971241	0	0.562611	-12.0085	0.00010522	0.00383107
TCONS_00376867	Odf3l1-OT1	ENSRNOG00000027109	Odf3l1	8:61474127-61539723	0.0953937	0	11.9475	0.000109288	0.00393902
TCONS_00062348	LINC1433	XLOC_046602	XLOC_046602	10:58286790-58329075	0	0.261362	-11.9694	0.000112941	0.00404345
TCONS_00169696	LINC3751	XLOC_133027	XLOC_133027	18:56152631-56179281	0.241071	0	12.0008	0.00011425	0.00407668
TCONS_00032834	LINC837	XLOC_025209	XLOC_025209	1:122158790-122301262	0.0287193	1.45009	-4.88172	0.000114993	0.00409225
TCONS_00001970	LINC54	XLOC_001590	XLOC_001590	1:24358632-24367330	0.728399	0	11.9717	0.000115732	0.00411583
TCONS_00154372	LINC3376	XLOC_120483	XLOC_120483	17:50554899-50574616	0	0.549323	-11.9236	0.000120488	0.00426795
TCONS_00113235	ENSRNOG00000029397-AS2	XLOC_086292	XLOC_086292	14:13629013-13815844	0	0.280788	-14.2251	0.000122223	0.00432653
TCONS_00095477	LINC2163	XLOC_071900	XLOC_071900	13:92830675-92887319	0.264959	6.75194	-3.88498	0.000125587	0.00441641
TCONS_00234606	ENSRNOG00000056184-AS2	XLOC_185159	XLOC_185159	3:55672216-55685669	0	0.799084	-11.912	0.000127065	0.00445377
TCONS_00334268	LINC7060	XLOC_265940	XLOC_265940	6:119006389-119058305	0	0.242853	-12.165	0.000128564	0.00448573
TCONS_00138375	LINC3063	XLOC_107054	XLOC_107054	16:38435738-38446104	0	1.04487	-11.9214	0.000131015	0.00456236
TCONS_00273539	ENSRNOG00000015514-AS1	XLOC_216458	XLOC_216458	4:179237920-179340829	0.0688747	0	12.0932	0.000131273	0.00456836
TCONS_00305833	Plppr1-OT1	ENSRNOG00000007575	Plppr1	5:68040277-68142184	0	0.604035	-14.4331	0.000131877	0.00457748
TCONS_00121474	LINC2764	XLOC_092970	XLOC_092970	15:19157272-19190306	0.196649	0	12.006	0.000137337	0.00470294
ENSRNOT00000077336	Tmbim1-202	ENSRNOG00000014797	Tmbim1	9:81576139-81586553	15.0402	1.48072	4.15354	0.000137555	0.00470439
TCONS_00202112	LINC4411	XLOC_159461	XLOC_159461	2:228221772-228260918	0	0.300139	-12.0298	0.000137918	0.00470776
TCONS_00195472	LINC4282	XLOC_154151	XLOC_154151	2:132788404-132805783	0	0.777071	-12.2531	0.000140983	0.00479708
TCONS_00245392	LINC5280	XLOC_194045	XLOC_194045	3:171434592-171444445	0.613667	0	11.894	0.000145117	0.00490968
TCONS_00311904	ENSRNOG00000022402-AS1	XLOC_247621	XLOC_247621	5:154831641-154894595	0.0957527	0	11.9084	0.000146404	0.00494697
TCONS_00076431	LINC1702	XLOC_057574	XLOC_057574	11:33327778-33338340	0.538293	0	11.813	0.000148642	0.00500678
TCONS_00288066	AABR07046866.1-OT2	ENSRNOG00000060709	AABR07046866.1	5:9946572-10125252	0	0.31726	-14.2918	0.000151514	0.0050716
TCONS_00415227	LINC8898	XLOC_330600	XLOC_330600	X:17092733-17109625	0	0.754658	-12.1457	0.000152528	0.00509918
TCONS_00421437	LINC9031	XLOC_335935	XLOC_335935	X:126837563-126918360	0	0.579827	-14.0245	0.000158613	0.0052664
TCONS_00033110	LINC872	XLOC_025471	XLOC_025471	1:123131509-123152355	0	0.452398	-11.7326	0.000161974	0.00535008
TCONS_00409476	ENSRNOG00000002751-AS1	XLOC_325590	XLOC_325590	X:75540967-75566562	0	0.427861	-11.9501	0.000162033	0.00535008
TCONS_00073399	AABR07034706.1-OT1	ENSRNOG00000038119	AABR07034706.1	11:84800598-84833539	0.187918	0	11.8981	0.00016218	0.00535164
TCONS_00069813	Olig2-OT2	ENSRNOG00000028658	Olig2	11:31355156-31431418	0.041392	6.68178	-6.52336	0.000162863	0.00537088
TCONS_00237008	LINC5135	XLOC_187141	XLOC_187141	3:92518093-92556183	0.013706	7.62845	-8.24717	0.000164067	0.00540058
TCONS_00394406	LINC8411	XLOC_312862	XLOC_312862	9:32915035-33122230	0	0.231531	-14.1026	0.000165157	0.00542311
TCONS_00323333	AABR07065353.1-OT4	ENSRNOG00000037891	AABR07065353.1	6:123358428-123376395	0	0.652697	-12.0407	0.000171151	0.00557889
TCONS_00342787	ENSRNOG00000004200-AS1	XLOC_272573	XLOC_272573	7:83670236-83685929	0	0.595777	-11.7143	0.000174295	0.00565725
TCONS_00180873	Dhodh-OT1	ENSRNOG00000015063	Dhodh	19:42018001-42092858	0.0834443	0	11.9111	0.000180132	0.00578861
TCONS_00014427	LINC348	XLOC_011216	XLOC_011216	1:181234380-181349518	1.59387	0	16.8776	0.000180204	0.00578861
TCONS_00014422	LINC345	XLOC_011216	XLOC_011216	1:181169592-181349518	1.01639	0	16.8725	0.000180492	0.00579165
TCONS_00076086	ENSRNOG00000028658-AS3	XLOC_057272	XLOC_057272	11:31288652-31430559	0	0.312984	-13.9598	0.000181506	0.0058172
TCONS_00267241	LINC5704	XLOC_211367	XLOC_211367	4:92275533-92321057	0	0.20505	-11.7072	0.000181876	0.00582558
TCONS_00130127	LINC2907	XLOC_100062	XLOC_100062	15:39324793-39340582	0.327709	0	11.6617	0.000182372	0.0058345
TCONS_00132542	LINC2967	XLOC_102118	XLOC_102118	15:72725550-72820453	0	0.536146	-14.132	0.000183748	0.00587498
TCONS_00046757	LINC1158	XLOC_035553	XLOC_035553	10:4688582-4707564	0.305821	0	11.812	0.000185173	0.00590291
ENSRNOT00000084434	AABR07024786.1-201	ENSRNOG00000059262	AABR07024786.1	16:16454743-16473307	0	0.492999	-11.6816	0.000185662	0.00591499
TCONS_00307334	LINC6478	XLOC_244200	XLOC_244200	5:98882459-98937838	0	0.798357	-13.9505	0.000187719	0.00596632
TCONS_00184975	ENSRNOG00000011671-AS3	XLOC_145376	XLOC_145376	19:32363333-32380424	0.29815	0	11.6587	0.000191638	0.00606926
TCONS_00386646	LINC8229	XLOC_306733	XLOC_306733	9:48623046-48730453	0.218291	4.41296	-3.54961	0.000191994	0.00607694
TCONS_00151867	Atxn1-OT3	ENSRNOG00000016998	Atxn1	17:19219152-19463317	3.08524	0.461513	3.53982	0.000194063	0.00612409
TCONS_00279225	Osbpl3-OT1	ENSRNOG00000010011	Osbpl3	4:80009096-80084291	0	0.575198	-13.91	0.000194464	0.00612614
TCONS_00345518	AC096473.3-OT2	ENSRNOG00000055700	AC096473.3	7:120404211-120458522	0	0.768246	-13.8922	0.000198003	0.00620838
TCONS_00161869	AABR07028137.1-OT1	ENSRNOG00000046403	AABR07028137.1	17:57605145-57874112	0.094084	0	13.9021	0.000199598	0.00625287
TCONS_00087957	ENSRNOG00000060153-AS1	XLOC_066233	XLOC_066233	12:18836643-18931922	0	0.452834	-13.9141	0.000200528	0.00626553
TCONS_00050613	LINC1218	XLOC_038268	XLOC_038268	10:55970165-55991265	0.231157	0	11.5853	0.000201067	0.00627871
TCONS_00243673	LINC5248	XLOC_192716	XLOC_192716	3:152492732-152514142	0.259036	0	11.7482	0.000202303	0.00631363
TCONS_00386619	LINC8221	XLOC_306733	XLOC_306733	9:48458979-48536396	0.0574897	2.4304	-4.61147	0.000203675	0.00634165
TCONS_00222410	Nfkbil1-OT2	ENSRNOG00000000839	Nfkbil1	20:4674450-4940250	0	0.157812	-13.9084	0.000203877	0.00634423
TCONS_00072701	LINC1636	XLOC_054363	XLOC_054363	11:74632941-74651246	0.267822	0	11.5941	0.00020479	0.00636526
TCONS_00333324	LINC7044	XLOC_265194	XLOC_265194	6:105262472-105269669	0	1.21109	-11.6293	0.000205468	0.00637893
TCONS_00032693	LINC809	XLOC_025114	XLOC_025114	1:121281804-121293091	0	0.935046	-11.9023	0.000206779	0.00641219
TCONS_00014400	LINC329	XLOC_011216	XLOC_011216	1:180852581-180949279	0	3.56183	-16.9605	0.000207495	0.00641952
TCONS_00121010	ENSRNOG00000008203-AS1	XLOC_092553	XLOC_092553	15:14428670-14577377	0	0.302917	-13.9661	0.000213427	0.0065651
TCONS_00290138	LINC6164	XLOC_230346	XLOC_230346	5:37741703-37758575	0	0.527676	-11.6635	0.000215815	0.00662712
TCONS_00032706	LINC811	XLOC_025125	XLOC_025125	1:121309737-121363256	0	0.873316	-14.0155	0.000217525	0.00667197
TCONS_00176801	LINC3905	XLOC_138861	XLOC_138861	18:69733508-69737218	0	2.39973	-11.6661	0.000224672	0.00682083
TCONS_00192071	LINC4212	XLOC_151216	XLOC_151216	2:77387721-77395437	0	1.30266	-11.8048	0.000231026	0.00696238
TCONS_00299309	LINC6328	XLOC_237618	XLOC_237618	5:156781447-156793225	0.398339	0	11.5365	0.00023141	0.00696612
TCONS_00027312	LINC581	XLOC_021218	XLOC_021218	1:53603698-53618033	0	0.602572	-11.6205	0.000232714	0.00699549
TCONS_00250712	LINC5365	XLOC_198065	XLOC_198065	3:56926159-56940256	0	0.657228	-11.6885	0.000235972	0.00706767
TCONS_00180250	LINC3987	XLOC_141650	XLOC_141650	19:34760760-34798955	0.124653	0	11.5299	0.000237584	0.00710403
TCONS_00328723	ENSRNOG00000005492-AS1	XLOC_261153	XLOC_261153	6:43001913-43076582	0.28932	0	13.7041	0.000241338	0.00718016
TCONS_00406952	LINC8737	XLOC_323384	XLOC_323384	X:32394743-32407282	0.38073	0	11.5383	0.000242004	0.00719599
TCONS_00151429	LINC3297	XLOC_118076	XLOC_118076	17:13899106-13948964	0.410881	0	13.6994	0.00024758	0.00734397
TCONS_00204925	ENSRNOG00000033134-AS1	XLOC_161797	XLOC_161797	2:11491408-11808136	0.0864123	0	14.1272	0.000247941	0.00734397
TCONS_00222682	ENSRNOG00000000512-AS1	XLOC_176230	XLOC_176230	20:5864583-5895218	0.169086	0	11.6453	0.000250637	0.00740742
TCONS_00348609	LINC7469	XLOC_276923	XLOC_276923	7:5330046-5352376	0	0.373648	-11.5425	0.00025634	0.0075385
TCONS_00113296	ENSRNOG00000002031-AS1	XLOC_086292	XLOC_086292	14:13780514-13871005	0	0.433455	-13.7613	0.000260677	0.00764506
TCONS_00103492	LINC2352	XLOC_078553	XLOC_078553	13:98578651-98592992	0	0.572229	-11.521	0.000262669	0.00769505
TCONS_00259949	AABR07054897.1-OT1	ENSRNOG00000048755	AABR07054897.1	3:173175932-173444398	0.0773157	0	13.6566	0.000264311	0.00773467
TCONS_00105500	LINC2410	XLOC_080142	XLOC_080142	14:10309168-10328213	0	0.412897	-11.4586	0.000267763	0.00780513
TCONS_00038092	LINC1005	XLOC_029291	XLOC_029291	1:195333712-195429004	0	0.396381	-13.7218	0.000269387	0.00784036
TCONS_00329442	Hdac9-OT1	ENSRNOG00000004158	Hdac9	6:53975738-54020406	0.0978213	0	11.436	0.000276425	0.00800599
TCONS_00069327	LINC1570	XLOC_051704	XLOC_051704	11:22114696-22132993	0	0.691085	-12.127	0.000278702	0.00805018
ENSRNOT00000079886	Abhd16a-203	ENSRNOG00000056637	Abhd16a	20:5093478-5094737	0.0498247	17.268	-7.3482	0.000280234	0.00809005
TCONS_00205134	AABR07007399.1-OT1	ENSRNOG00000049010	AABR07007399.1	2:12252640-12529614	0.000638	0.467856	-8.7548	0.000281489	0.00812191
TCONS_00423428	LINC9051	XLOC_337641	XLOC_337641	Y:712851-776601	0	0.572588	-13.6653	0.000282073	0.00812794
TCONS_00048061	ENSRNOG00000005042-AS2	XLOC_036403	XLOC_036403	10:18443584-18507694	0	0.565098	-13.6513	0.000285829	0.00822055
TCONS_00005714	Zim1-OT1	ENSRNOG00000015071	Zim1	1:70244858-70256839	0	0.723831	-11.6027	0.000287672	0.00826177
TCONS_00226203	RT1-CE10-OT2	ENSRNOG00000050210	RT1-CE10	20:130328-176783	0.422045	0	13.5839	0.000287726	0.00826177
TCONS_00380372	LINC8083	XLOC_301962	XLOC_301962	8:99385620-99436234	0	0.192196	-11.7777	0.000290195	0.00831173
TCONS_00228088	Pcdh15-OT1	ENSRNOG00000000606	Pcdh15	20:15317771-15334745	0	0.458367	-11.4443	0.000292817	0.00835863
TCONS_00080098	Pcyt1a-OT1	ENSRNOG00000001762	Pcyt1a	11:71543840-71629210	0	2.99444	-16.5304	0.00029549	0.0084125
TCONS_00265833	LINC5688	XLOC_210071	XLOC_210071	4:80187130-80202550	0.284397	0	11.4385	0.000301159	0.00853306
TCONS_00269590	LINC5737	XLOC_213218	XLOC_213218	4:124492834-124584161	0	0.371793	-13.5976	0.000307534	0.0086815
TCONS_00054426	ENSRNOG00000002963-AS1	XLOC_040815	XLOC_040815	10:91040008-91047496	1.14226	32.4594	-4.02749	0.000309956	0.00872686
TCONS_00386624	LINC8226	XLOC_306733	XLOC_306733	9:48459374-48564416	0.6055	9.18714	-3.14521	0.000313625	0.008807
TCONS_00420041	LINC9001	XLOC_334750	XLOC_334750	X:94425465-94475881	0	0.179535	-11.6741	0.000321768	0.00897921
TCONS_00150191	LINC3268	XLOC_117157	XLOC_117157	17:81241-356992	0	0.174481	-14.0505	0.000329908	0.00917282
TCONS_00229990	LINC4993	XLOC_181563	XLOC_181563	20:42265064-42276835	0.346862	0	11.333	0.000332259	0.00923339
TCONS_00084939	ENSRNOG00000001342-AS5	XLOC_064179	XLOC_064179	12:38691271-38715206	0.192812	0	11.4682	0.000333133	0.00924807
TCONS_00392234	LINC8345	XLOC_311187	XLOC_311187	9:120423972-120466551	0.120419	0	11.6532	0.000336912	0.00931915
TCONS_00337895	LINC7204	XLOC_268584	XLOC_268584	7:13385036-13402033	0	0.432807	-11.3701	0.000337284	0.00932345
TCONS_00401812	LINC8586	XLOC_318806	XLOC_318806	KL568139.1:8160328-8202607	0	0.195248	-11.5626	0.000345362	0.00948913
TCONS_00339411	LINC7246	XLOC_269773	XLOC_269773	7:33158470-33184899	0.206426	0	11.6929	0.000346168	0.0095015
TCONS_00237393	Mpped2-OT1	ENSRNOG00000004863	Mpped2	3:97721237-97772513	8.48633	1.72502	3.10234	0.000352262	0.0096342
TCONS_00010752	LINC242	XLOC_008307	XLOC_008307	1:131506146-131561065	0	0.141945	-11.4752	0.000355003	0.0096943
TCONS_00304823	Dcaf12-OT3	ENSRNOG00000050790	Dcaf12	5:57675387-57684442	4.18308	0.129785	5.80783	0.000356785	0.00973302
TCONS_00402977	LINC8616	XLOC_319953	XLOC_319953	KL568160.1:1483808-1512221	0	0.240672	-11.2785	0.000357047	0.00973521
TCONS_00048130	LINC1185	XLOC_036460	XLOC_036460	10:19271115-19366585	0	0.333871	-13.4902	0.00036165	0.00984421
TCONS_00107214	Gabrg1-OT1	ENSRNOG00000002360	Gabrg1	14:39964588-40010100	0	0.720124	-13.5169	0.000366423	0.00991508
TCONS_00291494	ENSRNOG00000033862-AS1	XLOC_231499	XLOC_231499	5:59236734-59282398	0.372839	0	13.4338	0.000368691	0.00994804
TCONS_00373393	LINC7938	XLOC_296254	XLOC_296254	8:28830135-28843207	0	0.581419	-11.4415	0.000371027	0.0100043
TCONS_00076546	LINC1703	XLOC_057655	XLOC_057655	11:34164876-34227821	0.279891	0	13.4171	0.000374713	0.0100732
TCONS_00386621	LINC8223	XLOC_306733	XLOC_306733	9:48459204-48606575	0.0110137	1.61912	-6.34117	0.000375311	0.0100842
TCONS_00315051	LINC6632	XLOC_250005	XLOC_250005	6:15272984-15373091	0	0.345196	-13.6036	0.000383561	0.0102595
TCONS_00141074	Adam3a-OT1	ENSRNOG00000017554	Adam3a	16:72052978-72142539	0	0.503013	-13.954	0.000405647	0.0107482
TCONS_00032493	LINC746	XLOC_024972	XLOC_024972	1:119192282-119275878	0	0.41328	-13.5796	0.000414859	0.0109344
TCONS_00107336	LINC2458	XLOC_081570	XLOC_081570	14:43248349-43374793	0	0.454404	-12.177	0.000416393	0.0109572
TCONS_00159410	LINC3536	XLOC_124487	XLOC_124487	17:23455273-23549881	0	0.319868	-13.3923	0.000418403	0.0109939
TCONS_00103770	LINC2362	XLOC_078774	XLOC_078774	13:101658849-101663422	0.777987	0	11.1384	0.000420446	0.0110203
TCONS_00420341	ENSRNOG00000055454-AS2	XLOC_335027	XLOC_335027	X:105015322-105114915	0.164023	0	13.3299	0.000424394	0.0111129
TCONS_00129939	Pspc1-OT4	ENSRNOG00000020782	Pspc1	15:37006280-37061841	0	0.547467	-13.4043	0.000429596	0.0112108
TCONS_00174461	LINC3850	XLOC_136906	XLOC_136906	18:37261871-37270535	0	0.715005	-11.1338	0.000432436	0.0112574
TCONS_00336478	LINC7111	XLOC_267633	XLOC_267633	6:147202287-147298308	0.204059	0	13.6126	0.000434477	0.0112886
TCONS_00124652	LINC2818	XLOC_095450	XLOC_095450	15:61155322-61222158	0	0.474828	-13.4821	0.000436761	0.0113205
TCONS_00086467	LINC1930	XLOC_065190	XLOC_065190	12:3340372-3357414	0	0.407108	-11.2743	0.00044022	0.0113826
TCONS_00052077	LINC1237	XLOC_039172	XLOC_039172	10:68812010-68821614	0	0.748152	-11.331	0.000441833	0.0114053
TCONS_00207650	Itga1-OT1	ENSRNOG00000053550	Itga1	2:47268731-47281421	10.8143	1.08989	4.11187	0.000443567	0.0114415
TCONS_00400454	ENSRNOG00000016196-AS6	XLOC_317594	XLOC_317594	9:118890361-119098699	0	0.151893	-13.4573	0.000446226	0.0114985
TCONS_00218925	LINC4786	XLOC_173530	XLOC_173530	2:218591372-218642782	0.0894297	0	11.517	0.000446421	0.0114985
TCONS_00138588	LINC3068	XLOC_107249	XLOC_107249	16:42755801-42829574	0	0.384767	-13.3418	0.000458861	0.011723
TCONS_00420547	LINC9013	XLOC_335199	XLOC_335199	X:106647323-106652054	0.730279	0	11.0905	0.000465931	0.0118639
TCONS_00156564	LINC3418	XLOC_122293	XLOC_122293	17:82306393-82328042	0	0.275702	-11.0748	0.000468754	0.0119132
TCONS_00222048	RT1-T24-1-OT3	ENSRNOG00000032596	RT1-T24-1	20:3235417-3284167	0	0.133305	-11.1863	0.00047074	0.0119466
TCONS_00282291	LINC5976	XLOC_223699	XLOC_223699	4:124490928-124584118	0.0751663	2.85484	-4.41291	0.000471751	0.0119609
ENSRNOT00000080610	LOC100910284-201	ENSRNOG00000058727	LOC100910284	2:184915247-184917462	2.79585	92.0479	-4.26595	0.000478637	0.0120897
TCONS_00299814	AABR07050399.2-OT1	ENSRNOG00000059160	AABR07050399.2	5:163867961-163966619	0	0.279791	-13.2979	0.000479503	0.0121059
TCONS_00394263	Rims1-OT4	ENSRNOG00000011000	Rims1	9:28730859-28946545	0.0726657	0	13.2321	0.000494795	0.0123868
TCONS_00240919	Plcb4-OT2	ENSRNOG00000033119	Plcb4	3:128601343-128866266	0.338616	0	15.704	0.000499869	0.0124671
TCONS_00050610	LINC1215	XLOC_038268	XLOC_038268	10:55968974-55991265	0.148709	0	11.0456	0.000503801	0.0125185
TCONS_00188693	LINC4140	XLOC_148334	XLOC_148334	2:16055132-16162803	0	0.25916	-13.3158	0.000504274	0.0125245
TCONS_00055339	LINC1309	XLOC_041462	XLOC_041462	10:101528986-101539038	0	0.598299	-11.0744	0.000506474	0.0125528
TCONS_00077829	LINC1749	XLOC_058676	XLOC_058676	11:57791592-57815436	0	0.240857	-11.0222	0.00050656	0.0125528
TCONS_00348154	LINC7426	XLOC_276589	XLOC_276589	7:665500-711231	0.323034	0	13.2282	0.000506588	0.0125528
TCONS_00400461	ENSRNOG00000016196-AS11	XLOC_317594	XLOC_317594	9:119032492-119052738	0	0.328805	-11.2336	0.000508411	0.0125922
TCONS_00222035	RT1-T24-3-OT1	ENSRNOG00000045924	RT1-T24-3	20:3198943-3233694	0	0.788139	-13.2654	0.000508818	0.0125964
TCONS_00238314	LINC5160	XLOC_188266	XLOC_188266	3:109176845-109267467	0.170165	0	13.2296	0.000511278	0.0126369
TCONS_00264382	LINC5657	XLOC_208900	XLOC_208900	4:62104107-62173010	12.1341	3.2471	2.70143	0.000517664	0.0127564
TCONS_00020988	LOC100911660-OT2	ENSRNOG00000047692	LOC100911660	1:257588775-257720548	0	0.206469	-13.285	0.000519671	0.0127896
TCONS_00238318	LINC5161	XLOC_188266	XLOC_188266	3:109220365-109267467	0.0718747	0	11.041	0.000520817	0.0127988
TCONS_00032439	LINC717	XLOC_024938	XLOC_024938	1:118327464-118368240	0	0.697323	-13.3067	0.000521838	0.0128121
TCONS_00111757	LINC2550	XLOC_085129	XLOC_085129	14:109891123-109902050	0.296006	0	10.9897	0.000525917	0.012865
TCONS_00066591	LINC1491	XLOC_049555	XLOC_049555	10:101178270-101224359	0.0804947	0	11.1549	0.000527372	0.0128947
TCONS_00249993	ENSRNOG00000005743-AS3	XLOC_197508	XLOC_197508	3:45528076-45553167	0	1.13632	-13.3281	0.000536402	0.0130737
TCONS_00097862	LINC2225	XLOC_073963	XLOC_073963	13:21142028-21170065	0	0.211656	-11.0545	0.000537682	0.0130908
TCONS_00130420	LINC2915	XLOC_100294	XLOC_100294	15:41997035-42007682	0	0.936556	-11.7833	0.000541258	0.0131561
TCONS_00423427	LINC9050	XLOC_337641	XLOC_337641	Y:712245-776601	0	0.438717	-13.2999	0.000546019	0.0132238
TCONS_00286028	ENSRNOG00000034228-AS1	XLOC_226760	XLOC_226760	4:173833585-173847493	0.249307	0	11.0898	0.000549485	0.0132897
TCONS_00187944	LINC4117	XLOC_147653	XLOC_147653	2:6257336-6503464	0	0.656636	-15.7961	0.000550756	0.0133084
TCONS_00192557	LINC4224	XLOC_151615	XLOC_151615	2:86681320-86769183	0.0842003	2.47416	-4.0627	0.00055773	0.0134587
TCONS_00386664	LINC8235	XLOC_306767	XLOC_306767	9:48651578-48658797	0	0.793904	-11.003	0.000579009	0.0138597
TCONS_00120187	AABR07016992.2-OT1	ENSRNOG00000047272	AABR07016992.2	15:5717053-5894803	0.0813833	0	13.1815	0.000583171	0.013922
TCONS_00308229	LINC6504	XLOC_244965	XLOC_244965	5:113853304-113866299	0	0.582885	-11.3931	0.000583739	0.0139272
TCONS_00358922	ENSRNOG00000043197-AS1	XLOC_285276	XLOC_285276	7:123485865-123490129	0	1.27262	-10.9348	0.000584311	0.0139272
TCONS_00075511	LINC1675	XLOC_056817	XLOC_056817	11:16423527-16458234	0	0.160767	-10.9885	0.000584431	0.0139272
TCONS_00014367	LINC306	XLOC_011212	XLOC_011212	1:180643796-180783261	0.552529	0	15.4848	0.00060498	0.0143213
TCONS_00222543	RT1-A1-OT1	ENSRNOG00000038999	RT1-A1	20:5335614-5418638	0.007533	2.69684	-7.6606	0.00061374	0.0144966
TCONS_00107316	LINC2453	XLOC_081556	XLOC_081556	14:43106764-43114825	0.386292	0	10.9233	0.000615804	0.0145261
TCONS_00421655	LINC9035	XLOC_336049	XLOC_336049	X:129604112-129810162	0.331099	0	15.4501	0.000623157	0.0146672
TCONS_00369007	LINC7862	XLOC_293088	XLOC_293088	8:104003654-104030445	0	0.335758	-11.6706	0.000624039	0.0146744
TCONS_00168107	LOC102554034-OT3	ENSRNOG00000011225	LOC102554034	18:38848420-38856693	0	0.626527	-10.8666	0.000636914	0.0149254
TCONS_00069009	ENSRNOG00000055793-AS1	XLOC_051376	XLOC_051376	11:15731863-15872733	0.53787	7.84101	-3.0763	0.000639729	0.0149755
TCONS_00175741	LINC3889	XLOC_138025	XLOC_138025	18:56159091-56179285	0.159702	0	10.961	0.000642336	0.015013
TCONS_00401744	LINC8585	XLOC_318738	XLOC_318738	KL568139.1:1619785-1643136	0	0.317508	-11.3793	0.000646107	0.0150748
TCONS_00169028	LINC3728	XLOC_132416	XLOC_132416	18:49102820-49115030	0	0.476484	-11.0567	0.000651518	0.0151434
TCONS_00086465	LINC1932	XLOC_065190	XLOC_065190	12:3340372-3357414	0	0.332143	-10.9804	0.000653198	0.0151741
TCONS_00201776	LINC4407	XLOC_159186	XLOC_159186	2:221738482-221756375	0	0.313913	-10.9716	0.000653551	0.0151757
TCONS_00325322	LINC6856	XLOC_258337	XLOC_258337	6:2336124-2349271	0.22409	0	10.8692	0.000657603	0.0152601
TCONS_00151865	Atxn1-OT1	ENSRNOG00000016998	Atxn1	17:19219152-19351524	0.0255723	0	11.0219	0.000660602	0.0153195
TCONS_00176799	LINC3903	XLOC_138861	XLOC_138861	18:69733508-69735492	0	2.5635	-10.8419	0.000662526	0.0153474
TCONS_00337748	ENSRNOG00000013220-AS3	XLOC_268467	XLOC_268467	7:12692669-12764643	16.0297	4.86092	2.52206	0.000663064	0.01535
TCONS_00195632	LINC4289	XLOC_154290	XLOC_154290	2:140414848-140416058	2.40402	0	10.8523	0.000669328	0.0154616
TCONS_00135307	LINC3003	XLOC_104620	XLOC_104620	16:1099583-1246687	0	0.161779	-13.0818	0.000672907	0.0155241
TCONS_00187512	LINC4105	XLOC_147280	XLOC_147280	2:1702635-1781021	0	0.389988	-13.3981	0.000673337	0.0155274
TCONS_00136447	ENSRNOG00000057542-AS1	XLOC_105526	XLOC_105526	16:10294930-10304261	0	0.539891	-10.8281	0.000673867	0.0155329
TCONS_00016600	Olr312-OT1	ENSRNOG00000050629	Olr312	1:213398854-213473677	0	0.394037	-13.3436	0.000686649	0.0157732
TCONS_00174463	LINC3851	XLOC_136908	XLOC_136908	18:37265611-37269349	0	1.34928	-10.8259	0.000688029	0.0157981
TCONS_00032825	LINC845	XLOC_025228	XLOC_025228	1:122132035-122175580	0.006318	1.42628	-6.94204	0.000696445	0.0159634
TCONS_00084515	LINC1872	XLOC_063946	XLOC_063946	12:31776223-31785550	0	0.605395	-10.9767	0.000696717	0.0159634
TCONS_00199853	LINC4368	XLOC_157660	XLOC_157660	2:197144009-197151130	0	1.00927	-11.3185	0.000697918	0.0159772
TCONS_00409287	Zcchc13-OT1	ENSRNOG00000002923	Zcchc13	X:74361564-74510055	0.0914357	0	13.0966	0.000698523	0.0159774
TCONS_00011218	LINC251	XLOC_008692	XLOC_008692	1:141229814-141259231	1.41248	19.9921	-3.02304	0.000699639	0.01598
TCONS_00333191	LINC7040	XLOC_265094	XLOC_265094	6:103218819-103299440	0	0.293082	-13.076	0.000699854	0.01598
TCONS_00129221	Olr1633-OT1	ENSRNOG00000053992	Olr1633	15:27603505-27679643	0	0.370603	-13.2806	0.000701514	0.0159979
TCONS_00035648	ENSRNOG00000017054-AS2	XLOC_027468	XLOC_027468	1:165181766-165237508	0.2138	0	12.9162	0.000720416	0.0163593
TCONS_00343177	ENSRNOG00000026502-AS1	XLOC_272945	XLOC_272945	7:94756047-94765574	0.321825	0	10.9398	0.000724004	0.0164198
TCONS_00378760	LINC8070	XLOC_300614	XLOC_300614	8:80812772-80818734	0	0.837232	-10.8092	0.000729342	0.0165092
TCONS_00338073	Cyp4f4-OT1	ENSRNOG00000032895	Cyp4f4	7:14891001-14894895	0	1.34722	-10.874	0.0007432	0.0167619
TCONS_00094230	LINC2132	XLOC_070973	XLOC_070973	13:77919570-77922409	1.00265	0	10.7983	0.000746031	0.0167869
TCONS_00355563	LINC7608	XLOC_282607	XLOC_282607	7:90011523-90063687	0	0.470172	-13.0897	0.000747477	0.0167898
TCONS_00156460	Slc39a12-OT1	ENSRNOG00000025639	Slc39a12	17:81536504-81541759	0	0.911468	-10.7607	0.000753085	0.0168961
TCONS_00276907	ENSRNOG00000005775-AS1	XLOC_219334	XLOC_219334	4:38338282-38420041	0	0.272974	-12.9818	0.000754112	0.0169092
TCONS_00184495	LINC4060	XLOC_144940	XLOC_144940	19:26474357-26543507	0	0.343855	-13.0471	0.000759392	0.0169778
TCONS_00025136	ENSRNOG00000061741-AS1	XLOC_019387	XLOC_019387	1:31123152-31198349	0	0.298898	-13.0029	0.000760266	0.0169903
TCONS_00105582	LINC2416	XLOC_080198	XLOC_080198	14:10841404-10853547	0.24046	0	10.8268	0.00076468	0.0170675
ENSRNOT00000076888	AABR07021544.1-202	ENSRNOG00000049537	AABR07021544.1	13:77784855-77822333	24.8975	7.32514	2.57168	0.000765933	0.0170884
TCONS_00172570	ENSRNOG00000016671-AS1	XLOC_135327	XLOC_135327	18:14304420-14471327	0	0.131382	-12.9723	0.000767867	0.017124
TCONS_00055340	LINC1310	XLOC_041462	XLOC_041462	10:101528986-101541802	0	0.398876	-10.8383	0.00076907	0.0171298
TCONS_00036995	LINC969	XLOC_028439	XLOC_028439	1:181176120-181295140	0	0.189346	-12.9628	0.000773837	0.0172217
TCONS_00299974	ENSRNOG00000009575-AS1	XLOC_238104	XLOC_238104	5:165235656-165259224	0	0.966856	-13.0075	0.000779197	0.0173193
TCONS_00007024	ENSRNOG00000020743-AS2	XLOC_005534	XLOC_005534	1:82581199-82612022	0.110064	0	11.0163	0.000783394	0.017391
TCONS_00174492	LINC3854	XLOC_136937	XLOC_136937	18:37345898-37349126	0	1.47	-10.7372	0.000785638	0.0174227
TCONS_00141472	LINC3114	XLOC_109778	XLOC_109778	16:77669359-77675094	0	0.825315	-10.7332	0.000786513	0.0174313
TCONS_00091526	LINC2084	XLOC_068845	XLOC_068845	13:31658941-31687772	0	0.228073	-11.2178	0.000801141	0.0176856
TCONS_00016133	ENSRNOG00000027542-AS2	XLOC_012352	XLOC_012352	1:206319840-206326891	0.445624	0	10.9765	0.000811259	0.0178542
TCONS_00032837	LINC847	XLOC_025228	XLOC_025228	1:122170368-122228319	0.00431067	1.61258	-7.79836	0.000831295	0.0181977
TCONS_00325179	LINC6853	XLOC_258227	XLOC_258227	6:307599-362043	0	0.374162	-12.8432	0.000847398	0.0184973
TCONS_00039314	LOC103691261-OT1	ENSRNOG00000036648	LOC103691261	1:212311121-212317268	0	0.84977	-10.8641	0.000850572	0.0185439
TCONS_00066578	LINC1488	XLOC_049545	XLOC_049545	10:101157177-101158615	1.80856	0	10.6718	0.00085267	0.018582
TCONS_00343715	LINC7327	XLOC_273423	XLOC_273423	7:100174190-100182715	0	0.600626	-10.8473	0.000853994	0.0186033
TCONS_00060810	ENSRNOG00000045816-AS1	XLOC_045589	XLOC_045589	10:42444837-42614833	0	0.130229	-12.9936	0.000857758	0.0186625
TCONS_00129638	Cebpe-OT1	ENSRNOG00000014282	Cebpe	15:33345902-33359243	0.230886	0	10.9594	0.000859957	0.0187028
TCONS_00316262	LINC6664	XLOC_250941	XLOC_250941	6:33627894-33640272	0.209055	0	10.6858	0.000862012	0.0187246
TCONS_00420546	LINC9011	XLOC_335199	XLOC_335199	X:106647323-106651177	0	1.16278	-10.6583	0.000862759	0.0187333
TCONS_00061777	Dnah9-OT1	ENSRNOG00000004171	Dnah9	10:52641959-52649413	0	0.652599	-10.7657	0.000865649	0.0187731
TCONS_00218926	LINC4787	XLOC_173530	XLOC_173530	2:218591372-218642858	0.219085	0	12.7693	0.000870453	0.0188392
TCONS_00028737	ENSRNOG00000016877-AS1	XLOC_022327	XLOC_022327	1:72545606-72553731	0	0.663272	-10.9191	0.000872177	0.0188668
TCONS_00032101	LINC679	XLOC_024672	XLOC_024672	1:114225385-114228251	0	1.95201	-10.9582	0.000872434	0.0188668
ENSRNOT00000093219	Wbp4-203	ENSRNOG00000011678	Wbp4	15:61753347-61762685	0.281566	0	10.6784	0.000879847	0.0189811
TCONS_00066832	Cd300lb-OT1	ENSRNOG00000036728	Cd300lb	10:103438154-103563307	0	0.158627	-12.8093	0.000881805	0.019008
TCONS_00189466	LINC4154	XLOC_148978	XLOC_148978	2:28695917-28740604	0	0.451398	-12.8081	0.000883081	0.0190218
TCONS_00074980	LINC1671	XLOC_056301	XLOC_056301	11:13114774-13118593	0	1.16355	-10.6436	0.000888149	0.0190986
TCONS_00246264	LINC5296	XLOC_194698	XLOC_194698	3:177301995-177308765	0.00344133	2.79036	-8.58663	0.000893164	0.0191987
TCONS_00321358	LINC6770	XLOC_255296	XLOC_255296	6:101375412-101382566	0	0.88921	-11.1726	0.000903756	0.0193797
TCONS_00058228	Olr1380-OT2	ENSRNOG00000049114	Olr1380	10:12716689-12784490	0	0.305234	-12.8386	0.000906069	0.0194138
TCONS_00258491	LINC5512	XLOC_204187	XLOC_204187	3:155093132-155101975	0	0.546849	-10.7567	0.000908376	0.0194398
TCONS_00240582	ENSRNOG00000038259-AS1	XLOC_190042	XLOC_190042	3:123927403-124001634	0	0.27304	-12.857	0.000923068	0.0196942
ENSRNOT00000088010	AABR07054564.1-201	ENSRNOG00000052901	AABR07054564.1	3:160964878-160973026	0	0.529233	-10.6074	0.00092644	0.0197239
TCONS_00157219	LINC3437	XLOC_122801	XLOC_122801	17:31480-269608	0	0.453794	-15.2412	0.000935776	0.019891
TCONS_00076139	ENSRNOG00000028658-AS6	XLOC_057272	XLOC_057272	11:31351424-31397192	0.003365	1.43038	-7.99578	0.000939115	0.0199304
TCONS_00036989	LINC965	XLOC_028439	XLOC_028439	1:181077534-181171775	0	0.309571	-13.3273	0.000939121	0.0199304
TCONS_00190382	Pde4d-OT1	ENSRNOG00000042536	Pde4d	2:40970333-41079828	1.31498	0.012351	7.53793	0.000941463	0.01995
TCONS_00247842	Pbx3-OT5	ENSRNOG00000022162	Pbx3	3:13484882-13554074	0	0.0650817	-10.6564	0.000946191	0.0200249
TCONS_00348011	ENSRNOG00000036827-AS1	XLOC_276481	XLOC_276481	7:145153401-145228196	0	0.258156	-12.7614	0.000951148	0.0200822
TCONS_00287376	LINC6106	XLOC_227928	XLOC_227928	5:2257139-2277170	0.159626	0	10.9272	0.000962377	0.0202553
TCONS_00137558	LINC3038	XLOC_106327	XLOC_106327	16:22350565-22359202	0	0.49096	-10.5763	0.000971557	0.0204323
TCONS_00098378	LINC2240	XLOC_074438	XLOC_074438	13:32230726-32248484	0	0.284073	-10.8351	0.000974299	0.020466
TCONS_00112078	LINC2557	XLOC_085397	XLOC_085397	14:571313-594097	0	0.197035	-10.6718	0.000978178	0.0204992
TCONS_00264183	LINC5654	XLOC_208726	XLOC_208726	4:58940121-58946790	0	0.663902	-10.6328	0.000985818	0.020627
TCONS_00008425	LINC191	XLOC_006518	XLOC_006518	1:95320189-95393339	0	0.258308	-12.7473	0.000988372	0.0206563
TCONS_00202713	LINC4417	XLOC_159964	XLOC_159964	2:238994790-239046408	0	0.359952	-12.7098	0.00100782	0.0209468
TCONS_00321359	LINC6771	XLOC_255297	XLOC_255297	6:101398745-101402806	0	1.12858	-10.6888	0.00102481	0.0212025
TCONS_00360439	ENSRNOG00000054378-AS1	XLOC_286319	XLOC_286319	7:141237422-141241328	0	1.06996	-10.557	0.00102822	0.0212238
TCONS_00348111	LINC7413	XLOC_276566	XLOC_276566	7:477743-489299	0.430859	0.00160467	8.23424	0.00102948	0.0212278
TCONS_00066799	LINC1507	XLOC_049724	XLOC_049724	10:103198426-103202054	0.000372	2.17722	-8.52968	0.00103762	0.0213684
TCONS_00367775	ENSRNOG00000056662-AS1	XLOC_292015	XLOC_292015	8:86478957-86854106	0.127235	0	14.9348	0.00104429	0.0214892
TCONS_00035591	Tpbgl-OT1	ENSRNOG00000017922	Tpbgl	1:164502124-164591829	0.121146	2.74204	-3.71557	0.00107127	0.0219319
TCONS_00259808	AABR07054850.1-OT2	ENSRNOG00000028440	AABR07054850.1	3:171832268-172013695	0	0.522766	-15.1	0.001082	0.0220869
TCONS_00192771	LINC4229	XLOC_151790	XLOC_151790	2:91702028-91727593	0	0.714512	-12.6635	0.00108259	0.0220906
TCONS_00033572	ENSRNOG00000013877-AS3	XLOC_025851	XLOC_025851	1:128617843-128629259	0	0.356055	-10.5309	0.00108976	0.02222
TCONS_00177055	LINC3911	XLOC_139040	XLOC_139040	18:73886617-73937357	0	0.355091	-12.6619	0.00109109	0.0222386
TCONS_00112923	LINC2584	XLOC_086033	XLOC_086033	14:10306461-10327737	0	0.873559	-12.6843	0.00109686	0.0223051
TCONS_00373608	LINC7940	XLOC_296460	XLOC_296460	8:30368562-30370229	0	2.45765	-10.5219	0.00109975	0.0223408
TCONS_00276590	ENSRNOG00000051922-AS1	XLOC_219049	XLOC_219049	4:31194710-31283334	0	0.205742	-12.6587	0.00110692	0.0224586
TCONS_00034677	LINC904	XLOC_026678	XLOC_026678	1:148310088-148403097	0	0.204885	-12.7272	0.00111037	0.0225172
TCONS_00069955	ENSRNOG00000001984-AS1	XLOC_052201	XLOC_052201	11:32498535-32507982	0.246524	0	10.5443	0.00111065	0.0225172
TCONS_00198669	LINC4355	XLOC_156972	XLOC_156972	2:183811540-183860088	0.202712	0	12.5795	0.00111638	0.0225905
TCONS_00401119	LINC8564	XLOC_318137	XLOC_318137	KL567919.1:14564-23972	0	0.456697	-10.5862	0.0011378	0.0229253
TCONS_00348825	LINC7475	XLOC_277109	XLOC_277109	7:9983916-9992144	0.267821	0	10.4307	0.00115453	0.0230938
TCONS_00239247	LINC5182	XLOC_188893	XLOC_188893	3:115133413-115208012	0.129363	0	12.5892	0.00115558	0.0231043
TCONS_00128557	LINC2889	XLOC_098935	XLOC_098935	15:14820525-14826709	0.392269	0	10.5703	0.00115813	0.0231326
TCONS_00414586	Gpr34-OT1	ENSRNOG00000039759	Gpr34	X:9815654-10155600	0.00305167	0.85813	-7.29183	0.00116594	0.0232678
TCONS_00316261	LINC6663	XLOC_250941	XLOC_250941	6:33627700-33684314	0.190154	0	12.6676	0.00118262	0.023515
TCONS_00025231	ENSRNOG00000016103-AS2	XLOC_019439	XLOC_019439	1:32053095-32071862	0.00199033	1.18726	-8.34229	0.00118509	0.0235534
TCONS_00143227	Cacna2d3-OT2	ENSRNOG00000031287	Cacna2d3	16:5010209-5095079	0	0.260003	-12.9525	0.00118824	0.0236074
TCONS_00077013	LINC1708	XLOC_058003	XLOC_058003	11:38906042-38913169	0	0.821915	-11.0517	0.00119245	0.0236581
ENSRNOT00000092815	AABR07058158.1-211	ENSRNOG00000062170	AABR07058158.1	7:102782876-102862161	0	0.049255	-10.4542	0.00119655	0.023695
TCONS_00334265	LINC7059	XLOC_265937	XLOC_265937	6:118966994-119013649	0	0.400957	-12.7078	0.0011988	0.023729
TCONS_00213791	LINC4671	XLOC_169517	XLOC_169517	2:146651398-146673619	0	0.208587	-10.6871	0.00120057	0.0237518
TCONS_00000613	LINC22	XLOC_000506	XLOC_000506	1:8511993-8571872	0	0.278713	-12.5713	0.00120084	0.0237518
TCONS_00196226	LINC4300	XLOC_154782	XLOC_154782	2:145506787-145513091	0	0.747305	-10.7192	0.00121612	0.0239319
TCONS_00232261	ENSRNOG00000033835-AS2	XLOC_183249	XLOC_183249	3:11357141-11365077	0	0.553538	-10.6183	0.00124548	0.0244116
TCONS_00230568	LINC5009	XLOC_182088	XLOC_182088	20:47359985-47394853	0	0.473362	-12.5384	0.0012456	0.0244116
TCONS_00038059	LINC1000	XLOC_029268	XLOC_029268	1:195030753-195064680	0	0.539385	-12.6665	0.00125507	0.0245703
TCONS_00399802	LINC8533	XLOC_317039	XLOC_317039	9:106092497-106101425	0.271998	0	10.5592	0.00125886	0.024626
TCONS_00237022	LINC5136	XLOC_187155	XLOC_187155	3:92545935-92549427	0	1.07764	-10.3995	0.00125923	0.024626
TCONS_00345467	LINC7355	XLOC_274764	XLOC_274764	7:120063245-120067198	0.522026	0	10.3421	0.00128382	0.0249779
TCONS_00065892	Plcd3-OT3	ENSRNOG00000003033	Plcd3	10:91156050-91218646	0	0.267773	-12.528	0.00129896	0.0252082
TCONS_00012544	Rab30-OT1	ENSRNOG00000010224	Rab30	1:157573324-157642199	0.176025	0	12.8218	0.00130842	0.0253324
TCONS_00131314	LINC2932	XLOC_100981	XLOC_100981	15:53701206-53734239	0	0.756468	-13.1044	0.00130855	0.0253324
TCONS_00085342	LINC1893	XLOC_064432	XLOC_064432	12:43729029-43733893	0.407443	0	10.2943	0.00132106	0.0255453
TCONS_00103952	LINC2368	XLOC_078914	XLOC_078914	13:104746054-104779780	0	0.578348	-12.7521	0.00132262	0.0255472
TCONS_00136508	Grid1-OT1	ENSRNOG00000055499	Grid1	16:11630292-11675813	0	0.352017	-12.4946	0.00132626	0.0255988
TCONS_00384371	LINC8187	XLOC_305019	XLOC_305019	9:11717585-11725651	0	0.45537	-10.3643	0.00132856	0.0256248
TCONS_00097610	LINC2221	XLOC_073717	XLOC_073717	13:8158125-8210952	0	0.300436	-12.4923	0.00134286	0.025854
TCONS_00039756	AC132720.2-OT3	ENSRNOG00000051534	AC132720.2	1:215640080-215662505	0.395586	0	12.41	0.00134817	0.0259282
TCONS_00095573	Sdccag8-OT6	ENSRNOG00000004181	Sdccag8	13:95086838-95348987	0.031992	0	12.4051	0.00134873	0.0259296
TCONS_00221540	ENSRNOG00000009503-AS1	XLOC_175661	XLOC_175661	2:264688672-264739825	0	0.316384	-12.5006	0.0013516	0.0259569
TCONS_00113512	LINC2607	XLOC_086531	XLOC_086531	14:16188759-16198040	0	0.462138	-10.6211	0.00135245	0.0259638
TCONS_00114934	Atp10d-OT1	ENSRNOG00000002312	Atp10d	14:38546574-38575908	0.338717	0	12.5511	0.00135318	0.0259686
TCONS_00069391	Jam2-OT1	ENSRNOG00000042848	Jam2	11:24277795-24285320	0.0754313	16.3338	-6.9958	0.0013537	0.0259692
TCONS_00217994	LINC4771	XLOC_172755	XLOC_172755	2:207141528-207147802	0.352384	0	10.4233	0.00135872	0.0260376
TCONS_00043786	ENSRNOG00000050224-AS1	XLOC_033271	XLOC_033271	1:252490634-252516215	0.324475	0	12.3896	0.00137655	0.0262664
TCONS_00022457	LINC474	XLOC_017050	XLOC_017050	1:280599742-280610566	0.19707	0	10.4175	0.00137995	0.0263004
TCONS_00180095	LOC498933-OT1	ENSRNOG00000011671	LOC498933	19:32364154-32376531	0.183958	0	10.5044	0.00139375	0.0265095
TCONS_00386502	Il1rl2-OT2	ENSRNOG00000014683	Il1rl2	9:47048728-47052011	0.588243	0	10.2508	0.00140217	0.0266507
TCONS_00098216	ENSRNOG00000002640-AS1	XLOC_074281	XLOC_074281	13:26863964-26909641	0	0.352438	-12.5322	0.00140691	0.0267215
ENSRNOT00000092869	AC134224.2-201	ENSRNOG00000062155	AC134224.2	1:221151827-221153278	0	11.17	-12.4867	0.00140739	0.0267215
TCONS_00054266	LINC1287	XLOC_040711	XLOC_040711	10:90158771-90169853	0	1.44876	-12.4741	0.00140841	0.0267255
TCONS_00174388	LINC3848	XLOC_136850	XLOC_136850	18:36099810-36151934	0	0.291736	-12.4365	0.00141737	0.0267956
ENSRNOT00000087168	AABR07013686.1-201	ENSRNOG00000055290	AABR07013686.1	2:250349516-250352466	0.66547	0	10.2613	0.00141781	0.0267956
TCONS_00327427	ENSRNOG00000056904-AS1	XLOC_260108	XLOC_260108	6:26557862-26600231	0	0.36813	-12.4354	0.00142429	0.0268423
TCONS_00254048	LINC5416	XLOC_200801	XLOC_200801	3:109545608-109553051	0.265495	0	10.2732	0.00143077	0.0269454
TCONS_00384369	LINC8185	XLOC_305017	XLOC_305017	9:11716682-11720679	0	0.885055	-10.3312	0.00144007	0.0270921
TCONS_00158559	LINC3505	XLOC_123798	XLOC_123798	17:11783164-11809779	0	0.605673	-12.5352	0.00144223	0.0271136
TCONS_00107154	Corin-OT1	ENSRNOG00000002302	Corin	14:38266256-38345171	0	0.22704	-12.6464	0.00145186	0.0272468
TCONS_00319647	Akap6-OT2	ENSRNOG00000004841	Akap6	6:73986142-73995734	0	1.56955	-12.4108	0.00145938	0.0273517
TCONS_00102783	LINC2341	XLOC_077937	XLOC_077937	13:92430569-92436910	0	0.547674	-10.2832	0.0014629	0.0273868
TCONS_00413486	LINC8869	XLOC_329203	XLOC_329203	X:147237647-147312596	0	0.2471	-12.7395	0.00146839	0.0274512
TCONS_00350466	LINC7521	XLOC_278220	XLOC_278220	7:22682389-22733442	0	0.295029	-12.4193	0.00148093	0.0276084
TCONS_00110930	LINC2530	XLOC_084433	XLOC_084433	14:94622482-94644146	0.102916	0	10.4443	0.00148213	0.0276132
TCONS_00376077	LINC7996	XLOC_298554	XLOC_298554	8:53966258-54134839	7.40882	2.56556	2.32655	0.00148647	0.0276731
TCONS_00258607	LINC5519	XLOC_204273	XLOC_204273	3:156790276-156868186	0.107114	0	12.3416	0.00148742	0.0276759
TCONS_00271213	LINC5763	XLOC_214660	XLOC_214660	4:146540344-146547969	0	0.579091	-10.6173	0.00149173	0.0277324
ENSRNOT00000093471	RGD1304622-203	ENSRNOG00000000040	RGD1304622	13:72861090-72880831	1.85869	0.0164183	7.62518	0.00149864	0.0277934
TCONS_00197068	LINC4317	XLOC_155553	XLOC_155553	2:156711173-156767205	0	0.346954	-12.7448	0.00150815	0.0278503
TCONS_00032824	LINC844	XLOC_025228	XLOC_025228	1:122132035-122173474	0	0.114682	-10.7473	0.00150823	0.0278503
TCONS_00369009	LINC7863	XLOC_293090	XLOC_293090	8:104011440-104027283	0	0.22614	-10.3376	0.00150883	0.0278503
TCONS_00366666	Pclaf-OT1	ENSRNOG00000016561	Pclaf	8:71514281-71526608	1.01506	19.0596	-3.41796	0.00151128	0.0278503
ENSRNOT00000089772	AABR07003030.2-202	ENSRNOG00000055070	AABR07003030.2	1:94092646-94152068	0	0.254505	-12.403	0.00153021	0.0280966
TCONS_00287894	AABR07046866.1-OT1	ENSRNOG00000060709	AABR07046866.1	5:9664456-10125252	0.0912073	1.31577	-3.07747	0.00153416	0.0281497
TCONS_00032334	LINC691	XLOC_024856	XLOC_024856	1:117121468-117128415	0	0.488099	-10.2732	0.00153709	0.0281938
TCONS_00262504	LINC5611	XLOC_207305	XLOC_207305	4:28702886-28753629	0	0.313754	-12.5195	0.00155836	0.0284961
TCONS_00247843	Pbx3-OT6	ENSRNOG00000022162	Pbx3	3:13484882-13655109	0	0.439826	-14.686	0.00157276	0.0287125
TCONS_00387562	ENSRNOG00000060984-AS1	XLOC_307545	XLOC_307545	9:60186029-60227393	0	0.421392	-12.5902	0.00158473	0.0288208
TCONS_00135387	LINC3004	XLOC_104620	XLOC_104620	16:1230663-1253386	0	0.640283	-12.3353	0.00159828	0.0290081
TCONS_00140438	Nrg1-OT1	ENSRNOG00000010392	Nrg1	16:63815560-63859010	0	0.338916	-12.3797	0.00160052	0.0290388
TCONS_00355143	LINC7604	XLOC_282218	XLOC_282218	7:81099627-81142917	0.181046	0	12.3003	0.00160811	0.0291468
TCONS_00089674	Atxn2-OT5	ENSRNOG00000001256	Atxn2	12:40266258-40272279	0.298421	0	10.148	0.0016149	0.0292303
TCONS_00083720	ENSRNOG00000023686-AS1	XLOC_063324	XLOC_063324	12:23667411-23677218	0.191308	0	10.2279	0.00161602	0.0292377
TCONS_00101406	AABR07021544.2-OT1	ENSRNOG00000057285	AABR07021544.2	13:77783773-77825170	0.0511913	0	10.3943	0.00161972	0.0292879
TCONS_00387801	LINC8261	XLOC_307706	XLOC_307706	9:65312161-65315248	0.579667	0	10.1409	0.00163557	0.0294602
TCONS_00309009	LINC6524	XLOC_245604	XLOC_245604	5:125155217-125174546	0.119713	0	10.4788	0.00163568	0.0294602
TCONS_00287395	AABR07046707.1-OT5	ENSRNOG00000042458	AABR07046707.1	5:2275682-2296624	0.127732	0	10.6638	0.00163585	0.0294602
TCONS_00355954	ENSRNOG00000004328-AS1	XLOC_282960	XLOC_282960	7:94954724-94967519	0.160835	0	10.3624	0.00164014	0.0295076
TCONS_00024712	LINC529	XLOC_019024	XLOC_019024	1:21980800-21987950	0.265611	0	10.2574	0.00166245	0.0298288
TCONS_00015909	LINC376	XLOC_012182	XLOC_012182	1:202832487-202837715	0	0.587341	-10.1201	0.00166898	0.0299259
TCONS_00244743	LINC5269	XLOC_193456	XLOC_193456	3:164753157-164767402	0.0266613	3.90988	-6.37277	0.00167425	0.0300003
TCONS_00325668	LINC6861	XLOC_258581	XLOC_258581	6:5818646-6067813	0	0.287155	-14.6206	0.00167693	0.0300299
TCONS_00174494	LINC3855	XLOC_136939	XLOC_136939	18:37358052-37359402	0	2.36723	-10.1688	0.00167702	0.0300299
TCONS_00064623	ENSRNOG00000002749-AS2	XLOC_048293	XLOC_048293	10:81751732-81755767	0	0.772534	-10.1355	0.00168373	0.0301198
TCONS_00072369	Iqcg-OT2	ENSRNOG00000026420	Iqcg	11:71035916-71108313	0.116878	0	12.326	0.00169178	0.0302233
TCONS_00392585	LINC8363	XLOC_311489	XLOC_311489	9:7449646-7455449	0.324684	0	10.1906	0.00169925	0.0303265
TCONS_00069015	ENSRNOG00000055793-AS2	XLOC_051376	XLOC_051376	11:15745569-15959981	0.214779	3.10299	-3.07759	0.00170506	0.0303895
TCONS_00134896	LINC2998	XLOC_104232	XLOC_104232	15:110866911-110900877	0	0.411023	-12.3049	0.00171401	0.0305389
TCONS_00321112	ENSRNOG00000051449-AS1	XLOC_255112	XLOC_255112	6:98631799-98668433	0.218524	0	12.2979	0.00172142	0.0306301
TCONS_00215975	LINC4737	XLOC_171382	XLOC_171382	2:183811540-183860058	0.161215	0	12.2188	0.00172226	0.0306349
TCONS_00244659	LINC5266	XLOC_193393	XLOC_193393	3:164332633-164340826	0.221083	0	10.1843	0.00172934	0.0307302
ENSRNOT00000087612	Spon1-201	ENSRNOG00000058003	Spon1	1:178636693-178807906	0.0154803	3.5026	-6.9844	0.00173158	0.0307395
TCONS_00141494	LINC3123	XLOC_109794	XLOC_109794	16:77736259-77742265	0	0.503859	-10.1027	0.00174833	0.0309855
TCONS_00262469	LINC5608	XLOC_207278	XLOC_207278	4:28164116-28192228	0	0.49671	-12.2807	0.00174945	0.0309951
TCONS_00277223	AC123138.1-OT1	ENSRNOG00000012822	AC123138.1	4:45051691-45247460	0	0.0686773	-12.2556	0.00175947	0.0311313
TCONS_00422426	LINC9043	XLOC_336809	XLOC_336809	X:142435529-142571051	0	0.48224	-14.5628	0.00176607	0.0312274
TCONS_00223839	LINC4890	XLOC_177040	XLOC_177040	20:19529409-19533519	0.407127	0	10.0542	0.00177493	0.031353
TCONS_00057283	LINC1352	XLOC_042839	XLOC_042839	10:4868067-4880845	0	1.07464	-12.2555	0.00177588	0.0313595
TCONS_00141560	LINC3127	XLOC_109857	XLOC_109857	16:78176763-78185135	0	0.48713	-10.5066	0.00177666	0.0313629
TCONS_00025820	LINC551	XLOC_019896	XLOC_019896	1:43063487-43071787	0	0.35183	-10.0468	0.0017941	0.0315874
TCONS_00113627	ENSRNOG00000002225-AS1	XLOC_086624	XLOC_086624	14:17008741-17118166	0.236866	3.88751	-3.2466	0.00181987	0.0319256
TCONS_00239156	LINC5177	XLOC_188818	XLOC_188818	3:114312534-114319652	0	0.458325	-10.22	0.00182828	0.0320321
TCONS_00195490	LINC4283	XLOC_154169	XLOC_154169	2:133487778-133495093	0	0.527153	-10.4254	0.00183915	0.0322004
TCONS_00343913	LINC7330	XLOC_273586	XLOC_273586	7:102945363-103028811	0.0835747	0	12.1395	0.00184467	0.0322654
TCONS_00303760	LINC6405	XLOC_241225	XLOC_241225	5:47404211-47410068	0.282095	0	10.0278	0.00184992	0.0323362
TCONS_00409907	LINC8797	XLOC_325985	XLOC_325985	X:79925398-80008835	0.0837747	0	12.1399	0.00186223	0.0325194
TCONS_00179842	LINC3975	XLOC_141313	XLOC_141313	19:26441818-26514785	0	0.276787	-12.7965	0.00188478	0.0328028
TCONS_00005258	ENSRNOG00000058087-AS2	XLOC_004307	XLOC_004307	1:63651137-63699120	0	0.288789	-12.2697	0.00188626	0.0328105
TCONS_00118974	Ehbp1-OT1	ENSRNOG00000008917	Ehbp1	14:107059816-107115211	0.138465	0	12.1828	0.00188699	0.0328127
TCONS_00141474	LINC3112	XLOC_109778	XLOC_109778	16:77669359-77675094	0	0.528905	-10.0854	0.00189114	0.0328528
TCONS_00398162	ENSRNOG00000019850-AS1	XLOC_315766	XLOC_315766	9:82627260-82647922	0	0.666361	-12.2635	0.00189295	0.0328602
TCONS_00415352	ENSRNOG00000039063-AS1	XLOC_330719	XLOC_330719	X:18483379-18489935	0	0.668318	-10.6263	0.00194376	0.0335004
TCONS_00247935	Rab14-OT1	ENSRNOG00000018901	Rab14	3:14334351-14391124	0	1.08121	-14.4723	0.00194442	0.0335004
TCONS_00028077	ENSRNOG00000053260-AS1	XLOC_021870	XLOC_021870	1:63724803-63791367	0.119198	0	12.2213	0.00194469	0.0335004
TCONS_00319974	ENSRNOG00000046896-AS1	XLOC_254201	XLOC_254201	6:78789329-78867748	0.0994943	0	12.3062	0.00194742	0.0335367
TCONS_00216878	ENSRNOG00000009602-AS1	XLOC_171917	XLOC_171917	2:193571847-193573697	0.874104	0	10.0053	0.00194978	0.0335665
TCONS_00032330	LINC688	XLOC_024854	XLOC_024854	1:117118742-117127403	6.63333e-05	0.732846	-8.19915	0.00195779	0.0336404
TCONS_00052630	LINC1249	XLOC_039533	XLOC_039533	10:75409836-75434140	0	0.565298	-12.2461	0.00195785	0.0336404
TCONS_00222409	Nfkbil1-OT1	ENSRNOG00000000839	Nfkbil1	20:4674449-4918836	0.0740253	4.59582	-5.19389	0.00196557	0.0337298
TCONS_00327937	LINC6925	XLOC_260463	XLOC_260463	6:30629736-30630864	26.0069	0.00152833	12.3374	0.00196622	0.0337301
TCONS_00032792	LINC819	XLOC_025180	XLOC_025180	1:122057425-122072211	0	0.596023	-11.6725	0.00196899	0.033756
TCONS_00134244	LINC2990	XLOC_103699	XLOC_103699	15:100630003-101005638	0	0.161313	-14.4536	0.00197687	0.0338544
TCONS_00301264	LINC6364	XLOC_238939	XLOC_238939	5:3135258-3202538	0.0981027	2.28216	-3.73423	0.00197726	0.0338544
TCONS_00150192	LINC3269	XLOC_117157	XLOC_117157	17:81242-357118	0	0.045611	-12.1541	0.00198234	0.0339305
TCONS_00271210	LINC5761	XLOC_214660	XLOC_214660	4:146538765-146543536	0	1.00517	-10.736	0.00199353	0.0341111
TCONS_00403184	LINC8621	XLOC_320158	XLOC_320158	KL568161.1:245995-253688	0	0.543767	-10.5351	0.00202054	0.0344525
TCONS_00263360	LINC5634	XLOC_208033	XLOC_208033	4:45963044-46009248	0	0.278078	-12.1533	0.00202554	0.0345045
TCONS_00220828	ENSRNOG00000014613-AS1	XLOC_175088	XLOC_175088	2:251737502-251762210	0	0.556706	-12.2758	0.0020463	0.0347365
ENSRNOT00000087561	AABR07053480.1-201	ENSRNOG00000057230	AABR07053480.1	3:109387834-109400678	0.127497	0	9.99737	0.00205472	0.0348241
TCONS_00322894	LINC6804	XLOC_256559	XLOC_256559	6:110916192-110923645	0.21549	0	10.0042	0.00206104	0.034887
TCONS_00273000	LINC5807	XLOC_216021	XLOC_216021	4:168697812-168723689	0	0.492813	-12.189	0.00206498	0.0349206
TCONS_00145288	ENSRNOG00000022421-AS1	XLOC_112992	XLOC_112992	16:20735594-20764235	0	0.425067	-12.1149	0.0020673	0.0349378
TCONS_00100145	LINC2289	XLOC_075865	XLOC_075865	13:59387216-59616067	0	0.254792	-14.3983	0.00206987	0.0349703
TCONS_00060221	LINC1406	XLOC_045184	XLOC_045184	10:34809043-34819586	0	0.28805	-10.1125	0.00207431	0.0350231
TCONS_00065203	LINC1467	XLOC_048669	XLOC_048669	10:86699309-86703677	0	0.642428	-9.98153	0.00208472	0.0351656
TCONS_00198670	LINC4358	XLOC_156972	XLOC_156972	2:183811540-183861162	0.134725	0	12.0286	0.00208658	0.035186
TCONS_00263547	LINC5638	XLOC_208220	XLOC_208220	4:48563488-48602202	0	0.315229	-12.1135	0.00209572	0.0353034
TCONS_00202892	ENSRNOG00000033088-AS1	XLOC_160109	XLOC_160109	2:242824357-242830622	0.249264	0	9.94554	0.0021094	0.0354454
TCONS_00189575	Serf1-OT1	ENSRNOG00000017945	Serf1	2:30346069-30352110	0.451129	1.16667e-05	9.05701	0.00211292	0.0354631
TCONS_00102790	ENSRNOG00000061764-AS1	XLOC_077944	XLOC_077944	13:92672765-92768247	0	0.133122	-12.1862	0.00212075	0.0355716
TCONS_00203535	LINC4440	XLOC_160621	XLOC_160621	2:252962642-252966825	0	0.771054	-10.1689	0.00212987	0.0356798
TCONS_00291505	ENSRNOG00000033862-AS2	XLOC_231499	XLOC_231499	5:59266065-59282398	0.210219	0	11.0144	0.00214258	0.0358469
TCONS_00004413	AABR07001592.2-OT2	ENSRNOG00000058564	AABR07001592.2	1:53861078-53884118	0.078725	0	10.1712	0.00216523	0.0361589
TCONS_00072034	LINC1626	XLOC_053873	XLOC_053873	11:66245406-66246811	1.12099	0	9.98331	0.00217651	0.0363021
TCONS_00406619	LINC8720	XLOC_323096	XLOC_323096	X:28704131-28713038	0	0.393614	-10.2955	0.00217915	0.0363237
TCONS_00103848	Mark1-OT2	ENSRNOG00000002339	Mark1	13:102893494-102925676	0	0.449983	-12.3227	0.00217916	0.0363237
TCONS_00308051	LINC6502	XLOC_244795	XLOC_244795	5:111596965-111616158	0	0.160987	-10.1212	0.00218962	0.0364412
ENSRNOT00000025795	AABR07001382.1-204	ENSRNOG00000018960	AABR07001382.1	1:41905436-41938439	0	0.130673	-10.5993	0.00219295	0.0364626
TCONS_00131316	LINC2933	XLOC_100981	XLOC_100981	15:53702702-53733060	0	0.147112	-10.6444	0.0021972	0.0365219
TCONS_00386622	LINC8224	XLOC_306733	XLOC_306733	9:48459204-48756059	0.0455373	0.870307	-3.43036	0.00222331	0.0368529
TCONS_00052634	LINC1250	XLOC_039536	XLOC_039536	10:75424553-75431039	0	0.514892	-10.2262	0.0022437	0.0371435
TCONS_00120920	LINC2755	XLOC_092463	XLOC_092463	15:14300987-14307751	0	0.377935	-9.84881	0.00225359	0.0372395
TCONS_00128298	LINC2877	XLOC_098734	XLOC_098734	15:9907643-9916275	0.186553	0	9.96359	0.00226026	0.0373229
TCONS_00151702	LINC3309	XLOC_118274	XLOC_118274	17:16748014-16754167	0.247282	0	9.88986	0.00226759	0.0373982
TCONS_00198369	ENSRNOG00000054204-AS1	XLOC_156709	XLOC_156709	2:179702118-179707815	0.263506	0	9.89697	0.00227179	0.0374477
TCONS_00190150	LINC4164	XLOC_149553	XLOC_149553	2:38563392-38570847	0	0.343908	-9.85296	0.00227528	0.0374734
TCONS_00401611	LINC8580	XLOC_318609	XLOC_318609	KL568139.1:8465800-8486352	0	0.581621	-12.0483	0.00229188	0.0376167
TCONS_00330409	LINC6969	XLOC_262712	XLOC_262712	6:69799239-69806855	0	0.455238	-10.2691	0.00229446	0.0376361
TCONS_00051456	ENSRNOG00000014285-AS1	XLOC_038754	XLOC_038754	10:62767384-62954876	0	0.286755	-14.2811	0.00230417	0.0377666
TCONS_00106017	Scarb2-OT1	ENSRNOG00000002225	Scarb2	14:17008741-17118644	10.7031	74.7303	-2.003	0.00230575	0.0377666
TCONS_00032489	LINC742	XLOC_024970	XLOC_024970	1:119188119-119272285	0	0.146714	-12.1473	0.00231036	0.0377831
TCONS_00412466	AABR07041179.1-OT1	ENSRNOG00000016400	AABR07041179.1	X:121578978-121662860	4e-05	0.227661	-10.6703	0.00232897	0.0380273
TCONS_00194969	ENSRNOG00000012734-AS1	XLOC_153782	XLOC_153782	2:122630294-122650360	0	0.611388	-12.1428	0.00233676	0.0381428
TCONS_00012290	LINC271	XLOC_009547	XLOC_009547	1:155310420-155489177	0	0.307718	-14.2672	0.00234346	0.0382056
TCONS_00115633	LINC2657	XLOC_088182	XLOC_088182	14:47988014-48023100	0.178087	0	11.9111	0.00235147	0.0383012
TCONS_00333154	LINC7035	XLOC_265061	XLOC_265061	6:103110668-103152395	0	0.371876	-12.417	0.00236943	0.0384884
TCONS_00173404	ENSRNOG00000019875-AS1	XLOC_136019	XLOC_136019	18:28386281-28390549	0	0.642573	-9.93957	0.00238067	0.0385622
TCONS_00008011	LINC178	XLOC_006195	XLOC_006195	1:89522278-89531975	0.147943	0	9.84172	0.00238974	0.0386774
TCONS_00076140	ENSRNOG00000028658-AS7	XLOC_057272	XLOC_057272	11:31351424-31430513	0.012505	2.53647	-6.83963	0.00241548	0.0389996
TCONS_00126065	LINC2846	XLOC_096728	XLOC_096728	15:95285748-95291350	0.266054	0	9.85938	0.00241639	0.0390026
TCONS_00369011	Tfdp2-OT1	ENSRNOG00000011241	Tfdp2	8:104014602-104042336	0.00194333	0.780249	-7.80349	0.00243155	0.0391881
TCONS_00037001	LINC974	XLOC_028439	XLOC_028439	1:181259896-181295140	0	0.0858007	-10.0787	0.00243848	0.0392643
TCONS_00302538	LINC6387	XLOC_240145	XLOC_240145	5:21192508-21248045	0.0301973	2.40013	-5.50307	0.0024554	0.0394892
TCONS_00052017	LINC1233	XLOC_039122	XLOC_039122	10:67776443-67789865	0.108522	0	9.84025	0.00247093	0.0396794
TCONS_00041854	Olr382-OT1	ENSRNOG00000013208	Olr382	1:230725278-230762443	0	0.291966	-11.936	0.00249707	0.0399884
TCONS_00105209	LINC2404	XLOC_079926	XLOC_079926	14:5537941-5556162	0	0.14068	-9.85873	0.00249764	0.0399884
TCONS_00001747	LINC49	XLOC_001385	XLOC_001385	1:21960950-21996095	0.133173	0	11.5452	0.00250419	0.0400813
TCONS_00203248	ENSRNOG00000009205-AS3	XLOC_160416	XLOC_160416	2:250236557-250242606	0	0.660602	-10.4778	0.00252249	0.0402976
TCONS_00037093	LINC986	XLOC_028511	XLOC_028511	1:184823530-184829167	0.255433	0	9.8488	0.00253876	0.0404892
TCONS_00024507	LINC524	XLOC_018849	XLOC_018849	1:19954813-19975692	0	0.523333	-11.9214	0.00254418	0.0405636
TCONS_00384003	ENSRNOG00000046254-AS1	XLOC_304815	XLOC_304815	9:9463420-9522430	0	0.180756	-11.9123	0.00255806	0.0407606
TCONS_00303329	LINC6399	XLOC_240823	XLOC_240823	5:38530421-38534637	0	0.605711	-9.83797	0.00257293	0.0409245
TCONS_00147613	LINC3221	XLOC_114974	XLOC_114974	16:55808505-55815201	0	0.361591	-9.77491	0.00258352	0.0410686
ENSRNOT00000078831	AABR07056953.1-201	ENSRNOG00000061159	AABR07056953.1	7:48548927-48646491	0.00402933	0.912834	-7.087	0.00258589	0.041094
TCONS_00053370	LINC1274	XLOC_040125	XLOC_040125	10:83747155-83750449	0.461312	0	9.92092	0.00259022	0.0411384
TCONS_00322522	Ptgr2-OT1	ENSRNOG00000038166	Ptgr2	6:108025248-108031643	0.003182	3.45215	-9.07214	0.00259329	0.0411671
TCONS_00215045	LINC4713	XLOC_170553	XLOC_170553	2:169780480-169788763	0	0.460241	-10.4016	0.00262251	0.0415402
TCONS_00259772	LINC5549	XLOC_205163	XLOC_205163	3:171663616-171743578	0	0.132358	-11.9141	0.00263991	0.0417545
TCONS_00093331	LINC2118	XLOC_070245	XLOC_070245	13:60657171-60678211	0	0.507507	-11.892	0.00263993	0.0417545
TCONS_00221486	LINC4847	XLOC_175586	XLOC_175586	2:262900906-262913855	0	0.83344	-11.902	0.00264859	0.0418544
TCONS_00041116	UST4r-OT1	ENSRNOG00000049826	UST4r	1:224307499-224376067	0	0.160635	-11.9814	0.00267964	0.0422079
TCONS_00132228	LINC2957	XLOC_101822	XLOC_101822	15:66778398-66820368	0	0.25164	-11.9012	0.00270526	0.0425487
TCONS_00294760	LINC6255	XLOC_234269	XLOC_234269	5:114014900-114032520	0	0.141642	-9.83795	0.00274419	0.0430851
TCONS_00364307	AABR07070046.1-OT3	ENSRNOG00000039200	AABR07070046.1	8:45691170-45830323	0.17225	0	13.9004	0.00275201	0.0431826
TCONS_00044269	LINC1117	XLOC_033677	XLOC_033677	1:259231152-259240033	0	0.257712	-9.68898	0.00278075	0.0435314
TCONS_00270240	LINC5749	XLOC_213831	XLOC_213831	4:133641460-133648072	0	0.399745	-9.88343	0.00278469	0.0435677
TCONS_00034956	LINC907	XLOC_026944	XLOC_026944	1:153259030-153264189	0	0.477364	-9.7981	0.00278999	0.0436378
TCONS_00102715	LOC498276-OT1	ENSRNOG00000046663	LOC498276	13:91203715-91237259	0.159026	0	11.7504	0.00279662	0.0437287
TCONS_00033113	LINC873	XLOC_025474	XLOC_025474	1:123146924-123150185	0	0.791021	-9.8467	0.00280922	0.0438873
ENSRNOT00000085858	AABR07027961.1-201	ENSRNOG00000058818	AABR07027961.1	17:51104924-51115296	0.13523	0	9.77159	0.00282776	0.0440997
TCONS_00141492	LINC3122	XLOC_109793	XLOC_109793	16:77734800-77741422	0	0.35956	-9.76234	0.00283819	0.0442236
TCONS_00032535	LINC799	XLOC_024999	XLOC_024999	1:119328822-119523199	0	0.23703	-14.0585	0.00286291	0.0445182
TCONS_00141371	LINC3105	XLOC_109678	XLOC_109678	16:77152436-77189540	0.121355	8.21221	-5.26356	0.00286434	0.0445275
TCONS_00278948	ENSRNOG00000005310-AS1	XLOC_221031	XLOC_221031	4:77278658-77281085	0	0.937233	-9.67745	0.00286803	0.0445443
TCONS_00137593	LINC3041	XLOC_106343	XLOC_106343	16:22715023-22720115	0	0.457315	-9.73161	0.00288244	0.0447055
ENSRNOT00000085058	AABR07026483.1-201	ENSRNOG00000054984	AABR07026483.1	16:78236947-78404678	0.102255	1.61604	-3.17723	0.00288433	0.0447093
TCONS_00407793	LINC8756	XLOC_324143	XLOC_324143	X:48827551-48835738	0	0.282292	-9.70918	0.00289321	0.0448331
TCONS_00279108	ENSRNOG00000008239-AS1	XLOC_221128	XLOC_221128	4:78232181-78235565	0	0.642754	-9.6289	0.00291179	0.045025
TCONS_00003957	LOC108348175-OT1	ENSRNOG00000048297	LOC108348175	1:50839185-50959155	1.25107	12.0555	-2.48611	0.00291233	0.045025
TCONS_00027883	ENSRNOG00000026569-AS1	XLOC_021711	XLOC_021711	1:62116516-62134357	0	0.566906	-11.8189	0.00295049	0.0454836
TCONS_00279597	LINC5934	XLOC_221510	XLOC_221510	4:86327070-86336710	0	0.301602	-10.0198	0.00296313	0.0456259
TCONS_00395803	ENSRNOG00000004076-AS1	XLOC_313895	XLOC_313895	9:53120640-53197388	0.0685763	0	11.7246	0.00300567	0.0460443
TCONS_00222722	Kctd20-OT1	ENSRNOG00000000517	Kctd20	20:6171915-6223809	6.44074	1.90291	2.57347	0.00300829	0.0460694
TCONS_00313427	LINC6596	XLOC_248725	XLOC_248725	5:169927952-169934391	0	0.374653	-9.7904	0.00301745	0.0461218
TCONS_00070011	ENSRNOG00000001699-AS2	XLOC_052245	XLOC_052245	11:33799256-33807263	0	0.342983	-9.93759	0.00304243	0.0464197
TCONS_00105674	ENSRNOG00000060904-AS1	XLOC_080248	XLOC_080248	14:11499811-11682422	0	0.248888	-13.9917	0.00304535	0.0464509
TCONS_00094761	Gpr161-OT2	ENSRNOG00000003073	Gpr161	13:83530654-83547918	1.1452	0.011271	7.3695	0.00304966	0.0464793
TCONS_00287207	LINC6095	XLOC_227776	XLOC_227776	5:649411-656254	0	0.309375	-9.585	0.00305886	0.0465509
TCONS_00032846	LINC852	XLOC_025245	XLOC_025245	1:122185049-122187438	0	0.986663	-9.72932	0.00306812	0.0466519
TCONS_00291766	LINC6192	XLOC_231698	XLOC_231698	5:62825422-62830217	0.257038	0	9.61345	0.00307165	0.046668
TCONS_00376198	LINC8005	XLOC_298581	XLOC_298581	8:54498427-54609188	0.214522	0	13.7877	0.00307499	0.0466902
TCONS_00305242	LINC6430	XLOC_242470	XLOC_242470	5:60685120-60687782	0.470947	0	9.65697	0.0030992	0.0469743
TCONS_00409278	LOC680227-OT1	ENSRNOG00000037911	LOC680227	X:74316910-74347647	0.164077	0	11.6137	0.00311756	0.0471164
TCONS_00413242	LINC8861	XLOC_328966	XLOC_328966	X:144258049-144277820	4.23333e-05	0.7185	-10.2022	0.00313109	0.0472871
TCONS_00072967	LINC1640	XLOC_054614	XLOC_054614	11:76428586-76459570	0.0876343	0	10.7816	0.00314522	0.0474429
TCONS_00363463	LINC7752	XLOC_288636	XLOC_288636	8:34747960-34950983	0	0.212166	-13.9615	0.00314584	0.0474429
TCONS_00091367	Serpinb5-OT1	ENSRNOG00000002640	Serpinb5	13:26864113-26909038	0	0.215727	-11.8012	0.00317293	0.047684
TCONS_00320971	LINC6763	XLOC_254993	XLOC_254993	6:96340012-96343881	0.313491	0	9.6019	0.0031787	0.047684
TCONS_00212727	LINC4645	XLOC_168572	XLOC_168572	2:128219812-128253488	0.145279	0	11.5952	0.00319648	0.0478426
TCONS_00195262	LINC4277	XLOC_154010	XLOC_154010	2:127359260-127364270	0.252335	0	9.62423	0.00319895	0.0478454
TCONS_00075826	LINC1683	XLOC_057103	XLOC_057103	11:26620473-26645983	0	0.3595	-11.6716	0.00320114	0.0478454
TCONS_00307827	Ifna4-OT1	ENSRNOG00000033823	Ifna4	5:106857638-106950344	0.0528703	0	11.5655	0.00322381	0.0481305
TCONS_00173478	LINC3825	XLOC_136072	XLOC_136072	18:28683421-28697603	0	0.632892	-11.6701	0.00323535	0.0482624
TCONS_00072321	ENSRNOG00000001793-AS1	XLOC_054067	XLOC_054067	11:70179924-70262469	0	0.129808	-11.9514	0.00323843	0.0482949
TCONS_00003270	LINC76	XLOC_002722	XLOC_002722	1:42587804-42599002	0.122946	0	9.8016	0.00324981	0.0484094
TCONS_00028506	Usp29-OT1	ENSRNOG00000015956	Usp29	1:69994951-70210319	0.00614133	1.24422	-6.91934	0.0032529	0.0484297
TCONS_00290143	LINC6166	XLOC_230346	XLOC_230346	5:37744016-37758575	0	0.156018	-9.66953	0.00325972	0.0484773
TCONS_00201428	LINC4399	XLOC_158872	XLOC_158872	2:216771742-216775628	0.305592	0	9.56959	0.00327208	0.0485832
TCONS_00415277	LINC8904	XLOC_330648	XLOC_330648	X:17156152-17163023	0	0.405917	-9.96115	0.00328374	0.0487272
TCONS_00232426	ENSRNOG00000017019-AS1	XLOC_183350	XLOC_183350	3:12679210-12734837	0	0.77314	-13.9122	0.00328397	0.0487272
TCONS_00376885	Odf3l1-OT2	ENSRNOG00000027109	Odf3l1	8:61517873-61548486	0.156246	0	11.5573	0.00328699	0.048734
TCONS_00335567	LINC7095	XLOC_266993	XLOC_266993	6:134623670-134625860	0	0.977327	-9.60135	0.00336226	0.0494391
TCONS_00305247	LINC6434	XLOC_242470	XLOC_242470	5:60685120-60687830	0.429366	0	9.52462	0.00336575	0.0494632
TCONS_00188440	Cetn3-OT1	ENSRNOG00000048563	Cetn3	2:12066146-12138261	0.0667393	0	11.5534	0.0033746	0.0495661
TCONS_00338319	LINC7211	XLOC_268925	XLOC_268925	7:16981933-17036863	0	0.16735	-11.6983	0.00338386	0.0496476

## Sheet: mRNA
transcript_id	transcript_name	gene_id	gene_name	transcript_locus	x12_FPKM	x90_FPKM	log2FoldChange	pvalue	padj
ENSRNOT00000041264	Cald1-201	ENSRNOG00000010233	Cald1	4:62221011-62290229	280.603	0	23.5467	2.16326e-52	1.15784e-47
ENSRNOT00000011906	Prima1-201	ENSRNOG00000008915	Prima1	6:127075954-127127413	175.801	0	22.4392	5.37605e-49	1.43871e-44
ENSRNOT00000065897	Myo10-202	ENSRNOG00000010161	Myo10	2:77868412-78071263	29.4462	0	21.8423	1.93736e-46	3.45645e-42
ENSRNOT00000076467	Pappa1-203	ENSRNOG00000033527	Pappa1	5:80920568-81150929	13.217	0	20.8692	1.14226e-41	1.52843e-37
ENSRNOT00000085131	Zfand3-201	ENSRNOG00000059659	Zfand3	20:8696436-8892569	18.6625	0	21.1395	5.80121e-41	6.20996e-37
ENSRNOT00000013524	Gask1b-201	ENSRNOG00000010183	Gask1b	2:178679041-178750051	25.7072	0	20.1296	1.03069e-36	9.19428e-33
ENSRNOT00000093679	Fhod3-205	ENSRNOG00000027230	Fhod3	18:16650806-17332205	2.73967	0	20.1627	2.67498e-36	2.04533e-32
ENSRNOT00000091328	Clip2-202	ENSRNOG00000021611	Clip2	12:25173135-25236929	23.6685	0	19.8599	2.78502e-35	1.86328e-31
ENSRNOT00000035346	Clint1-201	ENSRNOG00000005406	Clint1	10:30833914-31003910	7.60042	0	19.6397	2.36247e-33	1.14951e-29
ENSRNOT00000014312	Gpm6a-201	ENSRNOG00000010731	Gpm6a	16:39367697-39476025	0	19.473	-19.5366	1.24709e-32	5.56232e-29
ENSRNOT00000032780	Eln-201	ENSRNOG00000001469	Eln	12:24989298-25021863	29.5838	0	19.2134	2.13895e-30	8.17736e-27
ENSRNOT00000082355	Nrg1-207	ENSRNOG00000010392	Nrg1	16:63958645-64057434	8.81153	0	19.0588	8.47375e-30	3.0236e-26
ENSRNOT00000051028	Mpdz-201	ENSRNOG00000007894	Mpdz	5:99413190-99566317	5.38217	0	18.9839	1.88022e-29	6.28967e-26
ENSRNOT00000079090	Kdm5a-204	ENSRNOG00000010591	Kdm5a	4:152892599-152966068	11.0555	0	18.9632	2.60612e-29	8.20514e-26
ENSRNOT00000081522	Nrg1-206	ENSRNOG00000010392	Nrg1	16:63958645-64057434	7.14655	0	18.7567	5.87669e-28	1.65546e-24
ENSRNOT00000035722	Adcyap1r1-202	ENSRNOG00000012098	Adcyap1r1	4:85662892-85711696	0	31.9291	-19.0926	1.43431e-26	3.65565e-23
ENSRNOT00000058007	Megf11-203	ENSRNOG00000010634	Megf11	8:69971778-70178343	0	12.8797	-19.8573	2.0654e-26	5.02484e-23
ENSRNOT00000012634	LOC100912481-201	ENSRNOG00000009437	LOC100912481	14:85322310-85350786	20.4186	0	18.4838	2.62218e-26	5.9618e-23
ENSRNOT00000093033	Arhgef2-207	ENSRNOG00000020027	Arhgef2	2:187988925-188021377	17.8055	0	18.4735	2.67331e-26	5.9618e-23
ENSRNOT00000030485	Ube2k-201	ENSRNOG00000027088	Ube2k	14:44289247-44348691	8.92654	0	18.3508	2.13119e-25	4.38723e-22
ENSRNOT00000093201	Phldb2-202	ENSRNOG00000002171	Phldb2	11:57430166-57481589	9.97343	0	18.3027	4.74655e-25	9.40925e-22
ENSRNOT00000090808	Calu-203	ENSRNOG00000006197	Calu	4:56625606-56653111	18.2297	0	18.2676	7.0366e-25	1.34507e-21
ENSRNOT00000028426	Ccdc12-201	ENSRNOG00000020946	Ccdc12	8:118926478-118977051	9.80596	0	18.254	9.41918e-25	1.73842e-21
ENSRNOT00000037389	Kat6a-201	ENSRNOG00000025174	Kat6a	16:73945331-74020437	6.26484	0	18.1744	2.34001e-24	4.04014e-21
ENSRNOT00000065542	Kcnma1-201	ENSRNOG00000005985	Kcnma1	15:344685-1047625	0.690548	0	18.208	3.14299e-24	5.25695e-21
ENSRNOT00000017494	Ndrg4-202	ENSRNOG00000012482	Ndrg4	19:9766439-9801942	12.6741	0	18.1124	4.15801e-24	6.74391e-21
ENSRNOT00000067633	Pcdh15-201	ENSRNOG00000000606	Pcdh15	20:14952213-15334745	0	2.38039	-18.322	9.80377e-24	1.54332e-20
ENSRNOT00000081880	Thoc2-202	ENSRNOG00000007315	Thoc2	X:128162119-128268322	4.02922	0	18.0389	1.15766e-23	1.77033e-20
ENSRNOT00000041281	Cit-201	ENSRNOG00000001143	Cit	12:46334688-46414434	19.0244	0.0302537	10.0949	3.03663e-23	4.5147e-20
TCONS_00157240	TCONS_00157240	XLOC_122801	XLOC_122801	17:65435-357150	1.48376	0	18.0676	8.39745e-23	1.18278e-19
ENSRNOT00000065001	Sorcs3-201	ENSRNOG00000028832	Sorcs3	1:268189277-268620331	0	1.58837	-17.9101	1.20434e-22	1.65282e-19
ENSRNOT00000067661	Synj2-202	ENSRNOG00000017114	Synj2	1:46873011-46932529	6.17326	0	17.8181	1.37126e-22	1.83486e-19
ENSRNOT00000061921	Mta3-201	ENSRNOG00000004685	Mta3	6:6946695-7031828	3.98469	0	17.7049	3.75491e-22	4.90181e-19
ENSRNOT00000092581	Ubap2-203	ENSRNOG00000052087	Ubap2	5:57534866-57632182	6.20088	0	18.5642	4.65902e-22	5.93726e-19
ENSRNOT00000044625	Fmn1-202	ENSRNOG00000031760	Fmn1	3:104816987-105086436	1.19074	0	17.6279	8.7059e-22	1.08364e-18
ENSRNOT00000023935	Rps3-201	ENSRNOG00000017418	Rps3	1:164435878-164441167	543.584	1.99718	8.89656	1.35723e-21	1.61429e-18
ENSRNOT00000013398	Pacsin2-201	ENSRNOG00000009756	Pacsin2	7:124225255-124317379	9.35463	0	19.0397	1.97269e-21	2.29531e-18
ENSRNOT00000078425	Erg-202	ENSRNOG00000001652	Erg	11:35646116-35749594	2.82311	0	17.4899	4.50111e-21	5.1258e-18
ENSRNOT00000058295	Mbp-203	ENSRNOG00000016516	Mbp	18:79406381-79437310	0	16.301	-17.4688	5.55498e-21	6.19415e-18
ENSRNOT00000090643	Opcml-202	ENSRNOG00000023809	Opcml	8:29453643-29961975	0	0.959494	-17.4182	1.13468e-20	1.23941e-17
ENSRNOT00000043851	Adcyap1r1-203	ENSRNOG00000012098	Adcyap1r1	4:85662892-85711696	0	21.3958	-18.5244	2.07682e-20	2.22315e-17
ENSRNOT00000089456	Myof-202	ENSRNOG00000016117	Myof	1:256585898-256734730	47.7073	0.366824	7.83138	3.96123e-20	4.15719e-17
ENSRNOT00000061047	Pcp4-202	ENSRNOG00000001628	Pcp4	11:36851038-36912229	4.24538	0	17.3255	4.34152e-20	4.46867e-17
ENSRNOT00000082780	Itgb3-202	ENSRNOG00000048449	Itgb3	10:92667869-92707000	6.49038	0	17.2816	6.13323e-20	6.19375e-17
ENSRNOT00000075869	AABR07047789.1-202	ENSRNOG00000047513	AABR07047789.1	5:47908806-47972286	3.81665	0	17.2171	2.0233e-19	2.00543e-16
ENSRNOT00000073926	Adgre1-201	ENSRNOG00000046254	Adgre1	9:9431860-9585865	0	2.80869	-17.2513	3.90464e-19	3.79979e-16
ENSRNOT00000076610	Prelp-202	ENSRNOG00000003120	Prelp	13:50749542-50761306	35.7738	0.00374833	13.5611	4.53824e-19	4.29033e-16
ENSRNOT00000004279	Mpz-201	ENSRNOG00000003171	Mpz	13:89524329-89530068	370.627	1.81125	8.47449	4.56904e-19	4.29033e-16
ENSRNOT00000076882	Dnal1-203	ENSRNOG00000042333	Dnal1	6:107596782-107625214	8.01871	0	17.1316	7.50611e-19	6.80931e-16
ENSRNOT00000066928	Kcnma1-202	ENSRNOG00000005985	Kcnma1	15:344710-1047914	0	0.752881	-17.5608	1.22262e-18	1.07276e-15
ENSRNOT00000083152	Golgb1-202	ENSRNOG00000030314	Golgb1	11:66761584-66807694	4.75541	0	17.0701	2.09544e-18	1.80894e-15
ENSRNOT00000079298	Rreb1-202	ENSRNOG00000015701	Rreb1	17:27539133-27602934	3.36717	0	17.0476	2.56962e-18	2.18308e-15
ENSRNOT00000091316	Ptprm-202	ENSRNOG00000011700	Ptprm	9:114846161-115382445	0.711597	0	17.8575	4.29944e-18	3.59561e-15
ENSRNOT00000003125	Tec-201	ENSRNOG00000002278	Tec	14:37919233-38027925	1.88767	0	16.986	7.26324e-18	5.98078e-15
ENSRNOT00000005311	Col1a1-201	ENSRNOG00000003897	Col1a1	10:82745801-82762789	3590.8	54.7588	6.84073	7.56956e-18	6.13857e-15
ENSRNOT00000084884	Ralbp1-202	ENSRNOG00000013461	Ralbp1	9:113579118-113598480	11.0515	0.000211333	15.3337	1.61078e-17	1.28677e-14
ENSRNOT00000070912	Thbs1-201	ENSRNOG00000045829	Thbs1	3:109862120-109873466	954.556	15.2508	6.77193	1.80284e-17	1.39063e-14
ENSRNOT00000011803	Atf7ip-201	ENSRNOG00000008870	Atf7ip	4:170518673-170559532	4.87403	0	16.9471	1.81054e-17	1.39063e-14
TCONS_00213724	TCONS_00213724	XLOC_169457	XLOC_169457	2:145011176-145403003	0	2.78916	-18.5604	2.50175e-17	1.82562e-14
ENSRNOT00000092968	Gpm6a-202	ENSRNOG00000010731	Gpm6a	16:39368185-39476384	0.00807367	14.017	-9.94591	2.52243e-17	1.82562e-14
ENSRNOT00000061027	RT1-CE1-202	ENSRNOG00000050183	RT1-CE1	20:4638720-4792283	1.25045	0	16.8842	2.52406e-17	1.82562e-14
ENSRNOT00000079805	Cttn-203	ENSRNOG00000047280	Cttn	1:217603942-217631862	7.21247	0	16.9604	2.65479e-17	1.89457e-14
ENSRNOT00000076022	Adcy9-202	ENSRNOG00000049768	Adcy9	10:11393103-11512402	1.57568	0	16.8509	3.60231e-17	2.53693e-14
ENSRNOT00000078675	Myocd-202	ENSRNOG00000003669	Myocd	10:51685228-51778939	1.99421	0	16.8476	4.20848e-17	2.91148e-14
ENSRNOT00000006658	Zfp512-201	ENSRNOG00000039815	Zfp512	6:26284748-26314844	6.20176	0	16.8443	4.24295e-17	2.91148e-14
ENSRNOT00000084242	LOC103692570-201	ENSRNOG00000054165	LOC103692570	6:26426869-26445787	9.94088	0	16.845	4.39785e-17	2.97957e-14
ENSRNOT00000051097	Epb41-202	ENSRNOG00000010037	Epb41	5:150084611-150167077	2.35336	0	16.8849	4.51465e-17	3.02047e-14
ENSRNOT00000080291	Tmcc3-202	ENSRNOG00000007713	Tmcc3	7:35309265-35541344	0	3.26604	-18.0746	9.27998e-17	6.132e-14
ENSRNOT00000089474	Fxyd5-202	ENSRNOG00000021062	Fxyd5	1:89464860-89473904	19.5001	0	16.7519	1.32408e-16	8.64252e-14
ENSRNOT00000031448	Myt1-201	ENSRNOG00000017346	Myt1	3:177310753-177341547	0	9.82255	-16.7298	2.4302e-16	1.54847e-13
ENSRNOT00000003060	Hspbap1-201	ENSRNOG00000002241	Hspbap1	11:68142693-68197772	3.00812	0	16.6687	3.56916e-16	2.2213e-13
ENSRNOT00000019256	Sclt1-201	ENSRNOG00000014139	Sclt1	2:128523636-128675408	1.11718	0	16.7087	3.72831e-16	2.29368e-13
ENSRNOT00000071853	Pmepa1-201	ENSRNOG00000050404	Pmepa1	3:171294856-171342646	293.1	6.24984	6.35351	5.88475e-16	3.53898e-13
ENSRNOT00000042331	Med13l-201	ENSRNOG00000001120	Med13l	12:43423905-43576754	2.09765	0.00119633	11.4903	5.96033e-16	3.54461e-13
ENSRNOT00000072868	Safb-201	ENSRNOG00000050543	Safb	9:10450426-10471009	7.72179	0	16.6088	8.94122e-16	5.25891e-13
ENSRNOT00000009687	Fnbp4-201	ENSRNOG00000007241	Fnbp4	3:79570660-79610454	3.87303	0	16.5635	1.64832e-15	9.18989e-13
ENSRNOT00000092693	Upf2-204	ENSRNOG00000023593	Upf2	17:76198959-76250537	2.95358	0	16.549	2.00233e-15	1.08253e-12
ENSRNOT00000067198	Cntnap5c-201	ENSRNOG00000043185	Cntnap5c	13:6679368-7537275	0	0.348315	-16.7165	2.08932e-15	1.11827e-12
ENSRNOT00000082607	Smarcc1-202	ENSRNOG00000020804	Smarcc1	8:118206698-118325537	11.9303	0.105905	7.63656	2.54627e-15	1.34935e-12
ENSRNOT00000024803	Chrdl2-201	ENSRNOG00000018394	Chrdl2	1:165008912-165036435	5.33539	0	16.495	2.64086e-15	1.38575e-12
ENSRNOT00000076138	Chd9-204	ENSRNOG00000049302	Chd9	19:17414819-17494585	1.83743	0	16.4959	2.87212e-15	1.49247e-12
ENSRNOT00000010991	Map2k5-201	ENSRNOG00000007926	Map2k5	8:68055977-68282590	0.680921	0	16.5731	4.13689e-15	2.12903e-12
ENSRNOT00000066362	Gal3st1-201	ENSRNOG00000042041	Gal3st1	14:84231639-84247357	0	16.7068	-16.5247	6.27596e-15	3.16895e-12
ENSRNOT00000009714	Slit3-201	ENSRNOG00000007377	Slit3	10:20320878-20518518	28.8906	0.598248	6.3915	6.34541e-15	3.17407e-12
ENSRNOT00000092037	Pym1-201	ENSRNOG00000058130	Pym1	7:3173287-3193994	6.70926	0	16.4219	7.05471e-15	3.49619e-12
TCONS_00157194	TCONS_00157194	XLOC_122801	XLOC_122801	17:1-357150	0	0.695711	-16.4479	7.21827e-15	3.54444e-12
ENSRNOT00000082464	Med12l-204	ENSRNOG00000010680	Med12l	2:149315189-149494296	0.807354	0	16.4564	9.65097e-15	4.6959e-12
ENSRNOT00000035454	Ntm-201	ENSRNOG00000023720	Ntm	8:30039408-30222036	0	1.45128	-16.5364	1.05331e-14	5.07895e-12
ENSRNOT00000068413	Col11a1-201	ENSRNOG00000023148	Col11a1	2:216863428-217056523	620.919	19.324	5.80785	2.08917e-14	9.89546e-12
ENSRNOT00000027530	Taf13-201	ENSRNOG00000020315	Taf13	2:211359623-211370284	12.1056	0	16.3136	2.26737e-14	1.06453e-11
ENSRNOT00000060608	Mmd2-201	ENSRNOG00000001113	Mmd2	12:14021727-14078134	0.412896	66.0843	-6.50754	2.66126e-14	1.2386e-11
ENSRNOT00000078159	Ick-202	ENSRNOG00000008691	Ick	8:85413537-85472670	2.09392	0	16.2433	4.71586e-14	2.13904e-11
ENSRNOT00000083351	Thbs1-202	ENSRNOG00000045829	Thbs1	3:109862117-109872871	2499.05	88.5792	5.62301	6.36512e-14	2.839e-11
ENSRNOT00000045628	Tf-202	ENSRNOG00000030625	Tf	8:111694566-111721303	0.498416	86.4338	-6.63295	1.0529e-13	4.58164e-11
ENSRNOT00000046383	Filip1l-201	ENSRNOG00000001645	Filip1l	11:45039461-45124423	17.4809	0.377076	6.34492	2.37691e-13	9.86197e-11
ENSRNOT00000086554	Zfp385a-203	ENSRNOG00000036833	Zfp385a	7:144939623-144960527	0	9.11522	-16.0638	2.74449e-13	1.12995e-10
ENSRNOT00000067388	Tmem9b-202	ENSRNOG00000013591	Tmem9b	1:174361691-174379566	6.07974	0	16.0564	3.09907e-13	1.26619e-10
ENSRNOT00000060309	Ccdc136-201	ENSRNOG00000007100	Ccdc136	4:56674832-56704549	4.761	0.000434	13.5439	3.15986e-13	1.28125e-10
ENSRNOT00000082592	Prom1-202	ENSRNOG00000003098	Prom1	14:71542057-71637393	0	2.07856	-16.1332	3.43332e-13	1.37135e-10
ENSRNOT00000022277	Pllp-201	ENSRNOG00000016558	Pllp	19:10731855-10752641	0.0572133	38.1614	-8.54633	3.82947e-13	1.51826e-10
ENSRNOT00000015875	Ybx1-201	ENSRNOG00000023786	Ybx1	5:138319762-138336475	194.211	4.26945	6.30611	4.31148e-13	1.6844e-10
ENSRNOT00000017453	Postn-201	ENSRNOG00000012660	Postn	2:143656845-143688087	309.2	9.76888	5.77983	4.82775e-13	1.85896e-10
ENSRNOT00000012676	Ugt8-201	ENSRNOG00000009345	Ugt8	2:229644382-229718659	0.0481383	19.4492	-7.82	5.46329e-13	2.08866e-10
ENSRNOT00000016164	Pcsk5-201	ENSRNOG00000012036	Pcsk5	1:236031988-236313858	47.4311	2.01894	5.35731	6.06266e-13	2.29606e-10
ENSRNOT00000077416	Ugt1a1-210	ENSRNOG00000018740	Ugt1a1	9:95241626-95302816	4.41114	0.00240933	11.5102	7.88065e-13	2.94962e-10
ENSRNOT00000088716	Plppr1-202	ENSRNOG00000007575	Plppr1	5:67852180-68059933	0.176234	21.5118	-6.13958	1.09023e-12	4.02429e-10
ENSRNOT00000011178	Plxnc1-201	ENSRNOG00000007970	Plxnc1	7:35850398-36000906	0.074126	12.4697	-6.59666	1.38744e-12	5.0863e-10
ENSRNOT00000077670	Slc16a7-202	ENSRNOG00000007839	Slc16a7	7:68446768-68523364	1.2912	0	15.9411	1.58237e-12	5.72252e-10
ENSRNOT00000092824	Ppfia1-204	ENSRNOG00000020857	Ppfia1	1:217644270-217677997	2.9888	0	15.9322	1.76047e-12	6.32385e-10
ENSRNOT00000082359	Abcb4-205	ENSRNOG00000008012	Abcb4	4:22340840-22424862	1.19585	0	15.9317	2.00601e-12	7.15783e-10
ENSRNOT00000010845	Calb1-201	ENSRNOG00000007456	Calb1	5:29538380-29562773	0.201083	47.1682	-7.06401	2.16688e-12	7.63014e-10
ENSRNOT00000092099	Spon1-202	ENSRNOG00000058003	Spon1	1:178636544-178935051	0.184275	16.5342	-5.6781	2.30369e-12	8.00653e-10
ENSRNOT00000009825	B3gat1-201	ENSRNOG00000007142	B3gat1	8:27777179-27804515	0	6.12472	-15.8788	2.84719e-12	9.83162e-10
ENSRNOT00000089334	Sorcs2-202	ENSRNOG00000007033	Sorcs2	14:79540235-79912290	4.72384	0.068591	6.91196	2.93209e-12	1.00599e-09
ENSRNOT00000036647	Disp3-201	ENSRNOG00000026447	Disp3	5:165052871-165083487	0.066988	25.348	-7.73129	3.00444e-12	1.02425e-09
ENSRNOT00000019498	Oca2-201	ENSRNOG00000014465	Oca2	1:114679537-114987433	0	0.546953	-15.8807	3.43733e-12	1.15708e-09
ENSRNOT00000008278	Pde4b-202	ENSRNOG00000005905	Pde4b	5:121952977-122136554	0	0.907866	-15.8751	3.6742e-12	1.22145e-09
ENSRNOT00000002313	Runx1-201	ENSRNOG00000001704	Runx1	11:32769165-32858830	33.8182	1.26066	5.55367	4.26832e-12	1.41021e-09
ENSRNOT00000020357	Sparcl1-201	ENSRNOG00000015093	Sparcl1	14:6994190-7025308	1.42144	121.299	-5.61519	4.43206e-12	1.45532e-09
ENSRNOT00000003173	Hnrnpd-202	ENSRNOG00000002292	Hnrnpd	14:11256268-11274578	4.71922	0	15.733	5.94521e-12	1.94028e-09
ENSRNOT00000014979	Papss2-201	ENSRNOG00000011068	Papss2	1:251145363-251230715	167.388	8.47017	5.10815	8.08072e-12	2.62124e-09
ENSRNOT00000033900	Gldn-201	ENSRNOG00000024082	Gldn	8:58870516-58914603	1340.88	73.8801	4.98476	8.89283e-12	2.8673e-09
ENSRNOT00000050639	Grm5-202	ENSRNOG00000016429	Grm5	1:151439409-151783392	0.14286	12.9484	-5.67824	1.20188e-11	3.78402e-09
ENSRNOT00000049681	Acan-202	ENSRNOG00000028992	Acan	1:140792049-140824379	2.48573	0	15.6259	1.41822e-11	4.41323e-09
ENSRNOT00000079711	Abcc3-203	ENSRNOG00000002948	Abcc3	10:82074211-82117109	1.87416	0	15.6285	1.43358e-11	4.43523e-09
ENSRNOT00000008719	Ptprz1-201	ENSRNOG00000006030	Ptprz1	4:49941304-50140762	2.27812	122.997	-4.94889	1.52439e-11	4.68906e-09
ENSRNOT00000088441	Tec-202	ENSRNOG00000002278	Tec	14:37918652-38027920	0	1.27013	-15.6114	1.62198e-11	4.96076e-09
ENSRNOT00000078369	AABR07002779.1-201	ENSRNOG00000054614	AABR07002779.1	1:84792797-84812486	0.601677	79.2479	-6.23008	1.99903e-11	6.0109e-09
ENSRNOT00000042251	Slc8a1-202	ENSRNOG00000008479	Slc8a1	6:4258991-4520604	0.569507	0	16.5397	2.13267e-11	6.3415e-09
ENSRNOT00000074322	Dcx-201	ENSRNOG00000047712	Dcx	X:115098675-115175299	0.012098	5.59654	-8.04345	2.34886e-11	6.90759e-09
ENSRNOT00000001916	Serpine1-201	ENSRNOG00000001414	Serpine1	12:22641104-22651482	579.12	29.8402	5.08183	2.99874e-11	8.72291e-09
ENSRNOT00000003452	Tnn-201	ENSRNOG00000002548	Tnn	13:77829382-77896697	528.822	31.2799	4.88333	3.16744e-11	9.11945e-09
ENSRNOT00000091265	Dgkz-202	ENSRNOG00000017737	Dgkz	3:80844033-80875817	3.4006	0	16.0378	3.16914e-11	9.11945e-09
ENSRNOT00000007604	Slc1a2-201	ENSRNOG00000005479	Slc1a2	3:92640752-92665644	0.130471	29.173	-7.00238	3.36376e-11	9.62772e-09
ENSRNOT00000087928	Aldoa-202	ENSRNOG00000052802	Aldoa	1:198228387-198233215	15.1735	0	15.4972	4.00234e-11	1.12156e-08
ENSRNOT00000020528	Ccn2-201	ENSRNOG00000015036	Ccn2	1:21851660-21854773	2434.78	147.222	4.84785	4.09225e-11	1.13487e-08
ENSRNOT00000071482	Tor1aip2-202	ENSRNOG00000048267	Tor1aip2	13:73708815-73720429	14.6934	0.003312	12.7538	4.39661e-11	1.21299e-08
ENSRNOT00000043476	Atp2b2-201	ENSRNOG00000030269	Atp2b2	4:145703046-145948996	0	0.517435	-15.4806	4.51252e-11	1.23858e-08
ENSRNOT00000021938	Fcrl2-201	ENSRNOG00000016164	Fcrl2	2:186595051-186606172	0	12.4652	-15.6078	4.60676e-11	1.258e-08
ENSRNOT00000035657	Rpl23a-201	ENSRNOG00000023344	Rpl23a	10:65441295-65443981	134.733	0	17.798	4.64176e-11	1.26112e-08
ENSRNOT00000082732	LOC103694905-201	ENSRNOG00000055705	LOC103694905	KL568473.1:279960-399184	0.601519	0	15.4625	5.03742e-11	1.35486e-08
ENSRNOT00000070809	Pfdn4-201	ENSRNOG00000050932	Pfdn4	3:168124673-168132786	8.8602	0	15.4726	5.24975e-11	1.39728e-08
ENSRNOT00000031977	Smpd3-201	ENSRNOG00000000257	Smpd3	19:38237965-38321528	0.0244927	6.8973	-7.3114	5.27343e-11	1.39728e-08
ENSRNOT00000012578	Fstl3-201	ENSRNOG00000009311	Fstl3	7:12804919-12810570	98.1509	1.85191	6.53952	5.47446e-11	1.4434e-08
ENSRNOT00000042890	Opcml-201	ENSRNOG00000023809	Opcml	8:29714285-29962825	0.15889	12.9241	-5.52891	6.1722e-11	1.61939e-08
ENSRNOT00000030966	Arsi-201	ENSRNOG00000026060	Arsi	18:56180089-56186068	1124.04	69.7871	4.81687	6.46507e-11	1.68795e-08
ENSRNOT00000086772	Prmt8-201	ENSRNOG00000053804	Prmt8	4:160253073-160334910	0	1.49747	-15.4303	6.65983e-11	1.72481e-08
ENSRNOT00000023060	Car9-201	ENSRNOG00000017073	Car9	5:59008933-59015528	457.16	25.1721	4.98624	6.6707e-11	1.72481e-08
ENSRNOT00000055877	Adamts17-201	ENSRNOG00000037080	Adamts17	1:127802978-128124171	9.22987	0.400798	5.33648	8.31854e-11	2.11011e-08
ENSRNOT00000021434	Cnnm4-201	ENSRNOG00000015886	Cnnm4	9:43049587-43088690	1.78991	0	15.4391	8.57883e-11	2.16587e-08
ENSRNOT00000024344	Cd53-201	ENSRNOG00000017874	Cd53	2:209489279-209537087	0	2.58707	-15.4395	9.91674e-11	2.4919e-08
ENSRNOT00000082336	Slc4a5-202	ENSRNOG00000010378	Slc4a5	4:114935970-115002296	0	1.75878	-15.3553	1.23887e-10	3.06982e-08
ENSRNOT00000037115	Golim4-201	ENSRNOG00000024213	Golim4	2:174322872-174413038	0.766326	0	15.4226	1.36599e-10	3.36921e-08
ENSRNOT00000081321	Myo9b-202	ENSRNOG00000016256	Myo9b	16:19686630-19753133	1.3641	0	15.7779	1.71125e-10	4.18224e-08
ENSRNOT00000014747	Ednrb-201	ENSRNOG00000010997	Ednrb	15:88006977-88036354	4.42208	215.654	-4.80457	1.78119e-10	4.33339e-08
ENSRNOT00000049771	Slc4a7-202	ENSRNOG00000005957	Slc4a7	15:11836407-11912916	0.897703	0	15.418	2.05486e-10	4.95414e-08
ENSRNOT00000017022	Zfp451-201	ENSRNOG00000012718	Zfp451	9:38396449-38451656	1.14671	0	15.2895	2.3266e-10	5.56782e-08
ENSRNOT00000005073	Col5a2-201	ENSRNOG00000003736	Col5a2	9:52092511-52238564	358.667	27.689	4.49853	2.3302e-10	5.56782e-08
ENSRNOT00000019272	Inhba-201	ENSRNOG00000014320	Inhba	17:51898217-51912496	44.1439	1.29516	5.89681	2.90108e-10	6.90108e-08
ENSRNOT00000090001	R3hdm2-202	ENSRNOG00000007801	R3hdm2	7:70753101-70804778	6.41277	0.086543	7.02582	2.99034e-10	7.08195e-08
ENSRNOT00000066322	Mrpl42-201	ENSRNOG00000042740	Mrpl42	7:36573654-36597462	2.67039	0	15.3036	3.17569e-10	7.44881e-08
ENSRNOT00000035907	Trerf1-201	ENSRNOG00000022598	Trerf1	9:15655738-15700312	1.36664	0	15.2259	3.187e-10	7.44881e-08
ENSRNOT00000018577	Fgf1-201	ENSRNOG00000013867	Fgf1	18:32336102-32357072	2.88698	0	15.2198	4.05887e-10	9.40445e-08
ENSRNOT00000079215	Dnah12-201	ENSRNOG00000059865	Dnah12	16:2379480-2534131	0.00559667	2.24859	-7.81867	4.49616e-10	1.03728e-07
ENSRNOT00000058548	Larp4b-201	ENSRNOG00000015888	Larp4b	17:63265444-63313864	19.436	0.616643	5.78181	4.94965e-10	1.13214e-07
ENSRNOT00000021073	Tpm4-201	ENSRNOG00000015496	Tpm4	16:19385736-19399903	293.667	19.7639	4.69509	5.3678e-10	1.22256e-07
ENSRNOT00000079891	Pxdn-202	ENSRNOG00000060614	Pxdn	6:48866625-48980340	27.3658	1.88575	4.66391	5.60858e-10	1.27198e-07
ENSRNOT00000074226	Lox-202	ENSRNOG00000014426	Lox	18:47500330-47513065	583.132	44.515	4.51206	6.26597e-10	1.40913e-07
ENSRNOT00000004602	Adora1-201	ENSRNOG00000003442	Adora1	13:51042248-51076165	0.0732777	21.1371	-7.35806	6.94144e-10	1.55451e-07
ENSRNOT00000087579	Bcas1-202	ENSRNOG00000012906	Bcas1	3:167958276-168018410	0.0130153	31.522	-10.3993	7.07462e-10	1.57773e-07
ENSRNOT00000087619	NEWGENE_621351-201	ENSRNOG00000052925	NEWGENE_621351	4:29535852-29564768	407.98	0.0424917	14.089	7.54318e-10	1.67524e-07
ENSRNOT00000022049	Apba2-201	ENSRNOG00000016358	Apba2	1:125367280-125548890	0.469822	22.6646	-4.79227	8.63533e-10	1.90987e-07
ENSRNOT00000049259	Satb2-201	ENSRNOG00000010188	Satb2	9:63459095-63637677	0.352496	0	15.3025	8.93271e-10	1.95407e-07
ENSRNOT00000045773	Dpp6-201	ENSRNOG00000030547	Dpp6	4:4021008-4473307	0.0626363	5.15428	-5.53911	1.02636e-09	2.22404e-07
ENSRNOT00000084506	Clasp1-204	ENSRNOG00000002376	Clasp1	13:34400170-34582203	0.327513	0	15.1766	1.03632e-09	2.23657e-07
ENSRNOT00000076683	AC134204.1-201	ENSRNOG00000051069	AC134204.1	5:74727494-74954455	7.03475	0.264702	5.54577	1.05237e-09	2.2621e-07
ENSRNOT00000088814	Mrtfa-204	ENSRNOG00000018803	Mrtfa	7:122234119-122403667	14.4028	0.90523	4.80237	1.19191e-09	2.53154e-07
ENSRNOT00000023530	Igfbp5-201	ENSRNOG00000017206	Igfbp5	9:80150211-80167033	489.293	41.8002	4.35097	1.4269e-09	2.99499e-07
ENSRNOT00000009143	Dbx2-201	ENSRNOG00000006885	Dbx2	7:136967200-136997050	0	3.24982	-15.099	1.51522e-09	3.15561e-07
ENSRNOT00000001334	Ncor2-201	ENSRNOG00000001004	Ncor2	12:36871999-37033701	22.9913	1.56462	4.69257	1.5492e-09	3.21386e-07
ENSRNOT00000013205	Fkbp14-201	ENSRNOG00000009886	Fkbp14	4:84753633-84768249	49.4381	1.73393	5.63358	1.56082e-09	3.22548e-07
ENSRNOT00000076481	Mef2c-208	ENSRNOG00000033134	Mef2c	2:11658568-11820075	0.328226	0	15.0208	1.57076e-09	3.23352e-07
ENSRNOT00000027917	Rcn3-201	ENSRNOG00000043007	Rcn3	1:101076971-101086198	252.777	17.9117	4.6258	1.58807e-09	3.25665e-07
ENSRNOT00000004764	Efemp1-201	ENSRNOG00000003553	Efemp1	14:113202419-113295014	0.359645	21.7436	-5.12227	1.72755e-09	3.51572e-07
ENSRNOT00000042432	Cbs-201	ENSRNOG00000029528	Cbs	20:10362172-10386751	0	4.12796	-15.1618	1.75424e-09	3.5431e-07
ENSRNOT00000001559	Pde9a-201	ENSRNOG00000001174	Pde9a	20:10123651-10216548	0.0399187	5.66519	-6.34478	1.76923e-09	3.55993e-07
ENSRNOT00000092907	Mbd5-202	ENSRNOG00000027596	Mbd5	3:33440256-33504238	1.27824	0	15.688	1.82215e-09	3.65269e-07
ENSRNOT00000044163	Vegfa-204	ENSRNOG00000019598	Vegfa	9:17340341-17355681	3.35655	0	14.9793	1.85515e-09	3.70497e-07
ENSRNOT00000023874	Rit2-201	ENSRNOG00000017568	Rit2	18:23700013-24057917	0.351289	15.6951	-4.6971	2.01173e-09	3.9586e-07
ENSRNOT00000067325	Dnmt1-202	ENSRNOG00000039859	Dnmt1	8:21923489-21968415	1.14522	0	14.9959	2.02991e-09	3.97973e-07
ENSRNOT00000036194	Raph1-201	ENSRNOG00000014722	Raph1	9:67293309-67341341	46.5101	3.32373	4.61065	2.08669e-09	4.07614e-07
ENSRNOT00000059264	Slc26a8-201	ENSRNOG00000000512	Slc26a8	20:5881676-5927070	1.11338	0	14.9498	2.23196e-09	4.34405e-07
ENSRNOT00000028284	Tyrobp-201	ENSRNOG00000020845	Tyrobp	1:88875375-88879303	0	23.2105	-15.001	2.30406e-09	4.46812e-07
ENSRNOT00000003527	Dpp10-201	ENSRNOG00000002595	Dpp10	13:39434217-39643361	0	0.416633	-14.9391	2.45273e-09	4.72221e-07
ENSRNOT00000082235	Wbp11l1-202	ENSRNOG00000005505	Wbp11l1	4:170154227-170186942	0	2.93791	-15.0741	2.50135e-09	4.79855e-07
ENSRNOT00000041891	Apoe-201	ENSRNOG00000018454	Apoe	1:80612895-80615704	32.7921	1411.59	-4.62668	2.53466e-09	4.84509e-07
ENSRNOT00000087089	Nfia-204	ENSRNOG00000006966	Nfia	5:116420690-116721038	0.0110837	32.8024	-10.7277	2.60139e-09	4.95495e-07
ENSRNOT00000072386	LOC100910143-201	ENSRNOG00000049895	LOC100910143	14:2410342-2438592	1.71793	0	14.8981	2.84519e-09	5.40011e-07
ENSRNOT00000000784	Rhobtb1-201	ENSRNOG00000000633	Rhobtb1	20:20638579-20713128	0	1.67434	-15.4657	2.9184e-09	5.51948e-07
ENSRNOT00000065947	Abca8a-202	ENSRNOG00000004147	Abca8a	10:98319480-98390384	0.0155847	4.68102	-7.39616	2.94009e-09	5.54093e-07
ENSRNOT00000026121	Hmgcs2-201	ENSRNOG00000019120	Hmgcs2	2:200452624-200479423	1.44197	76.9874	-4.93413	2.98095e-09	5.59822e-07
ENSRNOT00000021516	Zmat2-201	ENSRNOG00000016016	Zmat2	18:29639872-29644652	10.1729	0	14.9027	3.02815e-09	5.63685e-07
ENSRNOT00000026481	Smtn-201	ENSRNOG00000019451	Smtn	14:83755142-83776863	65.0966	4.029	4.81678	3.03177e-09	5.63685e-07
ENSRNOT00000076418	Abcf2-205	ENSRNOG00000010609	Abcf2	4:7122906-7135606	3.8648	0	14.9086	3.03311e-09	5.63685e-07
ENSRNOT00000081780	Med13l-203	ENSRNOG00000001120	Med13l	12:43423905-43576804	0	0.567575	-14.9323	3.10472e-09	5.74996e-07
ENSRNOT00000012610	Sulf1-201	ENSRNOG00000009037	Sulf1	5:6000772-6186329	12.7923	0.941917	4.56574	3.14801e-09	5.81003e-07
ENSRNOT00000080387	Nwd1-201	ENSRNOG00000052129	Nwd1	16:18877257-18937562	0.036248	6.98832	-6.79607	3.21379e-09	5.91106e-07
ENSRNOT00000023786	Eif2s2-201	ENSRNOG00000017447	Eif2s2	3:150391460-150412179	27.3722	0.898665	5.73335	3.69041e-09	6.72708e-07
ENSRNOT00000093162	Wnk3-203	ENSRNOG00000002537	Wnk3	X:20423401-20454217	1.55268	0	14.8808	3.69516e-09	6.72708e-07
ENSRNOT00000018860	Ptpn5-201	ENSRNOG00000013981	Ptpn5	1:103197915-103256823	0	1.5148	-14.9723	3.93497e-09	7.06749e-07
ENSRNOT00000092194	Mmp24-202	ENSRNOG00000047028	Mmp24	3:151310598-151353117	0	2.2678	-15.0829	3.96709e-09	7.10135e-07
ENSRNOT00000006492	Ylpm1-201	ENSRNOG00000027317	Ylpm1	6:108820920-108896469	0.638393	0	14.9075	4.3649e-09	7.76154e-07
ENSRNOT00000000149	Ly86-201	ENSRNOG00000000137	Ly86	17:28104589-28191436	0	0.945105	-14.8523	4.41465e-09	7.82401e-07
ENSRNOT00000024065	Pnlip-201	ENSRNOG00000017725	Pnlip	1:279798187-279811372	0	6.15074	-14.8366	4.55237e-09	8.04146e-07
ENSRNOT00000087408	Fgf1-202	ENSRNOG00000013867	Fgf1	18:32273770-32359824	14.8656	0.881762	4.87441	5.08858e-09	8.9297e-07
ENSRNOT00000086424	Tmem38a-202	ENSRNOG00000011912	Tmem38a	16:18959356-18974729	3.06819	0	14.8602	5.2498e-09	9.18251e-07
ENSRNOT00000090502	LOC103694867-201	ENSRNOG00000053118	LOC103694867	KL568417.1:15968-35620	0	4.0946	-14.8258	5.32204e-09	9.27855e-07
ENSRNOT00000085894	Tpm1-207	ENSRNOG00000018184	Tpm1	8:72814740-72841496	509.566	39.4212	4.48524	5.89576e-09	1.01872e-06
ENSRNOT00000024974	Adam12-201	ENSRNOG00000018384	Adam12	1:205956342-206282575	115.486	12.2317	4.04417	5.90033e-09	1.01872e-06
ENSRNOT00000016273	Utrn-201	ENSRNOG00000011058	Utrn	1:6453549-6970040	6.48374	0.56397	4.32689	6.17605e-09	1.05949e-06
ENSRNOT00000027773	Actn4-201	ENSRNOG00000020433	Actn4	1:87078020-87147308	278.572	27.8976	4.12596	6.32114e-09	1.08022e-06
ENSRNOT00000077321	Pxdn-201	ENSRNOG00000060614	Pxdn	6:48866601-48970802	176.896	18.2142	4.08592	6.33726e-09	1.08022e-06
ENSRNOT00000014022	Myo10-201	ENSRNOG00000010161	Myo10	2:77868432-78071309	0.378862	15.9779	-4.60681	7.44092e-09	1.25634e-06
ENSRNOT00000045553	Kif21a-203	ENSRNOG00000014844	Kif21a	7:132071116-132143470	1.09646	0	15.6264	7.53941e-09	1.26897e-06
ENSRNOT00000017784	Kif26b-201	ENSRNOG00000028624	Kif26b	13:96775357-97173469	16.1883	1.64807	4.10059	8.25142e-09	1.37583e-06
ENSRNOT00000082417	Ncam2-203	ENSRNOG00000002126	Ncam2	11:20474483-20656340	0	0.420092	-14.7455	8.47227e-09	1.40826e-06
ENSRNOT00000018351	Trem2-201	ENSRNOG00000013578	Trem2	9:14611561-14618013	0	12.0409	-14.7694	8.51627e-09	1.4112e-06
ENSRNOT00000055386	LOC100911486-202	ENSRNOG00000000156	LOC100911486	5:171472273-171620380	62.732	6.61754	4.05282	9.39036e-09	1.55124e-06
ENSRNOT00000008734	Snap25-201	ENSRNOG00000006037	Snap25	3:129599353-129788400	0	0.512647	-15.0884	1.0101e-08	1.6635e-06
ENSRNOT00000090944	Tmem132b-203	ENSRNOG00000038406	Tmem132b	12:35972398-36398206	0.116442	7.9699	-5.26858	1.13017e-08	1.8442e-06
ENSRNOT00000007321	Sec16b-201	ENSRNOG00000005229	Sec16b	13:75177965-75216933	1.03268	0	14.6309	1.24195e-08	2.02045e-06
ENSRNOT00000003077	Pdgfra-201	ENSRNOG00000002244	Pdgfra	14:35527927-35581031	1.9562	72.5154	-4.40841	1.31098e-08	2.11986e-06
ENSRNOT00000009755	Thoc2-201	ENSRNOG00000007315	Thoc2	X:128161895-128268285	0.015354	5.81937	-7.81412	1.32573e-08	2.13726e-06
ENSRNOT00000045237	Fblim1-201	ENSRNOG00000011774	Fblim1	5:160122467-160156209	1.21116	0	14.6496	1.33583e-08	2.14708e-06
ENSRNOT00000091317	Tmem184b-202	ENSRNOG00000022802	Tmem184b	7:120593356-120636563	2.98951	0.018349	8.1341	1.40474e-08	2.23767e-06
ENSRNOT00000042316	Vgll3-201	ENSRNOG00000028774	Vgll3	11:3119885-3164751	89.4377	9.21962	4.0808	1.62386e-08	2.55628e-06
ENSRNOT00000019247	Rpl27a-201	ENSRNOG00000014214	Rpl27a	1:174132798-174135816	244.039	13.4341	4.99293	1.64696e-08	2.58505e-06
ENSRNOT00000039341	AABR07073181.1-201	ENSRNOG00000021437	AABR07073181.1	5:155812105-155885829	320.088	36.3691	3.94569	1.70017e-08	2.66076e-06
ENSRNOT00000021689	Fam129b-201	ENSRNOG00000015845	Fam129b	3:11921715-11971327	143.715	15.8607	3.98864	1.74834e-08	2.72817e-06
ENSRNOT00000032106	Adamtsl3-201	ENSRNOG00000010840	Adamtsl3	1:144239020-144561247	97.3655	11.1191	3.93357	1.78882e-08	2.78323e-06
ENSRNOT00000078972	RT1-A1-202	ENSRNOG00000038999	RT1-A1	20:5414448-5418015	0	18.8179	-14.5586	1.80654e-08	2.80265e-06
ENSRNOT00000003240	Gabrg1-201	ENSRNOG00000002360	Gabrg1	14:39964588-40049354	0.0116347	12.0874	-9.16228	1.89023e-08	2.9072e-06
ENSRNOT00000092965	Cntnap5c-202	ENSRNOG00000043185	Cntnap5c	13:6679369-7382961	0	0.147031	-15.2034	1.90222e-08	2.91726e-06
ENSRNOT00000075382	Arhgef10l-202	ENSRNOG00000050636	Arhgef10l	5:159018893-159119171	13.4891	0	19.6912	1.91942e-08	2.93523e-06
ENSRNOT00000088355	Igfbp3-201	ENSRNOG00000061910	Igfbp3	14:87457647-87465374	264.533	24.1448	4.25796	1.99446e-08	3.04129e-06
ENSRNOT00000019288	Pold2-201	ENSRNOG00000014098	Pold2	14:86111418-86117578	6.12595	0	14.5379	2.03659e-08	3.08795e-06
ENSRNOT00000022437	Eif3j-201	ENSRNOG00000016459	Eif3j	3:113976687-113998922	3.08038	0	15.409	2.14588e-08	3.23533e-06
ENSRNOT00000055602	Rrbp1-201	ENSRNOG00000005958	Rrbp1	3:138055240-138116664	37.1552	3.36847	4.26697	2.22969e-08	3.35065e-06
ENSRNOT00000014849	Rpl29-201	ENSRNOG00000011138	Rpl29	8:115131367-115133401	568.174	0	19.513	2.23489e-08	3.35065e-06
ENSRNOT00000061516	Clasp1-203	ENSRNOG00000002376	Clasp1	13:34400170-34582203	0.238083	0	14.6972	2.29491e-08	3.43102e-06
ENSRNOT00000093407	Dclk1-205	ENSRNOG00000032922	Dclk1	2:144646429-144936803	0	8.85008	-19.795	2.33092e-08	3.47515e-06
ENSRNOT00000033377	Rbm33-201	ENSRNOG00000006718	Rbm33	4:594882-695383	0.373709	0	14.5292	2.41863e-08	3.58594e-06
ENSRNOT00000080927	Prss23-202	ENSRNOG00000017307	Prss23	1:153732532-153752541	141.957	12.184	4.34177	2.42568e-08	3.58645e-06
ENSRNOT00000015283	Sox10-201	ENSRNOG00000011305	Sox10	7:120393254-120403523	0.0429477	19.1043	-7.94975	2.45135e-08	3.61443e-06
ENSRNOT00000057062	Dclk2-202	ENSRNOG00000016550	Dclk2	2:186117355-186245342	0	15.8737	-19.4887	2.70426e-08	3.95465e-06
ENSRNOT00000007802	Car8-201	ENSRNOG00000005669	Car8	5:21249020-21345810	0.337807	15.9031	-4.76143	2.84528e-08	4.12705e-06
ENSRNOT00000083568	Adamts2-201	ENSRNOG00000061484	Adamts2	10:36099263-36304409	35.5668	4.08501	3.92613	2.86786e-08	4.13737e-06
ENSRNOT00000016740	Smarca2-201	ENSRNOG00000011931	Smarca2	1:244630377-244782706	4.60249	0.237102	5.08963	2.9002e-08	4.17277e-06
ENSRNOT00000080218	Pabpc1-202	ENSRNOG00000008639	Pabpc1	7:75411311-75422268	23.731	0.570669	6.16601	3.15139e-08	4.50994e-06
ENSRNOT00000028877	Adra1d-201	ENSRNOG00000021256	Adra1d	3:124129558-124145566	22.0759	0.811021	5.57743	3.18736e-08	4.54925e-06
ENSRNOT00000084660	AABR07044900.1-202	ENSRNOG00000000373	AABR07044900.1	20:25064702-25826658	0.0477503	0	14.4722	3.19955e-08	4.55451e-06
ENSRNOT00000091001	Extl2-202	ENSRNOG00000014323	Extl2	2:218951141-218971259	1.84249	0	14.5007	3.30007e-08	4.68514e-06
ENSRNOT00000014452	Lhx2-201	ENSRNOG00000010551	Lhx2	3:22640604-22657887	21.6459	0.874399	5.43239	3.52238e-08	4.96127e-06
ENSRNOT00000001639	Itgb2-201	ENSRNOG00000001224	Itgb2	20:11777783-11815647	0	1.72787	-14.5246	3.54059e-08	4.97383e-06
ENSRNOT00000031331	Ltbp2-201	ENSRNOG00000012094	Ltbp2	6:108500114-108596446	760.014	96.1272	3.78956	3.55776e-08	4.98486e-06
ENSRNOT00000082435	Rubcn-201	ENSRNOG00000059880	Rubcn	11:71151132-71197035	17.9732	0	18.9582	3.72712e-08	5.20853e-06
ENSRNOT00000017065	C1qc-201	ENSRNOG00000012804	C1qc	5:155255005-155258392	0	18.3933	-14.4528	3.83113e-08	5.32606e-06
ENSRNOT00000081032	Wnt7b-202	ENSRNOG00000015750	Wnt7b	7:126420656-126461658	0.005487	7.41052	-9.54787	3.86238e-08	5.35559e-06
ENSRNOT00000091368	Brd4-202	ENSRNOG00000006770	Brd4	7:14222149-14302552	6.94909	0.0167427	9.49066	3.91331e-08	5.41219e-06
ENSRNOT00000010636	Nuak1-201	ENSRNOG00000008061	Nuak1	7:25039335-25113664	46.4255	5.06384	4.00417	4.02148e-08	5.5332e-06
ENSRNOT00000041878	Abhd3-201	ENSRNOG00000029370	Abhd3	18:1892413-1946840	1.08414	40.4615	-4.4248	4.11898e-08	5.65283e-06
ENSRNOT00000015178	Csnk1d-201	ENSRNOG00000036676	Csnk1d	10:110148600-110182291	10.0719	0.273411	6.02258	4.2103e-08	5.76338e-06
ENSRNOT00000000474	Numa1-201	ENSRNOG00000000417	Numa1	1:167066516-167090296	23.2209	1.12512	5.18114	4.23361e-08	5.7805e-06
ENSRNOT00000039997	Pcnp-201	ENSRNOG00000028411	Pcnp	11:47061354-47068648	4.73892	0	14.4208	4.30353e-08	5.86102e-06
ENSRNOT00000086114	Itga1-201	ENSRNOG00000053550	Itga1	2:47127219-47281421	66.2988	8.29606	3.79919	4.41956e-08	5.98856e-06
ENSRNOT00000055073	Prkca-202	ENSRNOG00000003491	Prkca	10:96191133-96584947	0	3.62516	-18.9949	4.48983e-08	6.06841e-06
ENSRNOT00000088188	Lrba-203	ENSRNOG00000023453	Lrba	2:185590986-186109464	1.44403	0	18.8534	4.5498e-08	6.13398e-06
ENSRNOT00000089569	Ttc29-202	ENSRNOG00000012342	Ttc29	19:33206026-33424972	0	0.304766	-14.5709	4.59811e-08	6.18354e-06
ENSRNOT00000005175	Kcnk10-201	ENSRNOG00000003813	Kcnk10	6:122419046-122545899	0.416053	15.8883	-4.45838	4.76507e-08	6.37602e-06
ENSRNOT00000044972	Nfasc-201	ENSRNOG00000030515	Nfasc	13:49335408-49487892	0.003951	1.33093	-7.56911	4.81576e-08	6.42777e-06
ENSRNOT00000079360	Csf1r-202	ENSRNOG00000018414	Csf1r	18:56431820-56457869	0	2.81392	-14.695	5.39283e-08	7.16229e-06
ENSRNOT00000051853	Cpxm2-201	ENSRNOG00000015902	Cpxm2	1:204048785-204087001	9.43587	0.333596	5.6294	5.62633e-08	7.4533e-06
ENSRNOT00000008285	Fez1-201	ENSRNOG00000006075	Fez1	8:39305128-39350270	4.2531	117.157	-3.97968	5.89663e-08	7.75442e-06
ENSRNOT00000090352	Sec24c-203	ENSRNOG00000009042	Sec24c	15:4036086-4055539	1.69137	0	14.3283	6.10087e-08	8.00335e-06
ENSRNOT00000059673	AABR07025295.1-201	ENSRNOG00000010107	AABR07025295.1	16:31734944-31946242	171.07	22.8896	3.70638	6.22467e-08	8.1458e-06
ENSRNOT00000075882	Sema4c-202	ENSRNOG00000016254	Sema4c	9:43130100-43139246	3.52973	0	14.3129	6.31339e-08	8.24175e-06
ENSRNOT00000035277	Tns1-201	ENSRNOG00000014182	Tns1	9:81194119-81400987	84.1753	11.0134	3.738	6.34141e-08	8.24664e-06
ENSRNOT00000001625	Pfkl-201	ENSRNOG00000001214	Pfkl	20:11393877-11415882	62.8807	5.78333	4.24851	6.41004e-08	8.30714e-06
ENSRNOT00000079250	Nhsl1-201	ENSRNOG00000060603	Nhsl1	1:13595295-13705396	30.5586	3.35044	3.99445	6.55476e-08	8.43342e-06
ENSRNOT00000089458	Fndc1-202	ENSRNOG00000030210	Fndc1	1:47605262-47687504	44.0979	5.05258	3.93869	6.73266e-08	8.64154e-06
ENSRNOT00000016194	Adgrb3-201	ENSRNOG00000012045	Adgrb3	9:31281316-32019205	0.532373	13.293	-3.84875	6.78693e-08	8.66961e-06
ENSRNOT00000024110	Ccdc3-201	ENSRNOG00000017933	Ccdc3	17:76995043-77093308	23.4147	2.44663	4.0573	6.81138e-08	8.68013e-06
ENSRNOT00000081235	Phactr3-201	ENSRNOG00000057996	Phactr3	3:173799833-173871904	0	0.817508	-14.3734	7.02498e-08	8.90991e-06
ENSRNOT00000017705	Zfyve16-201	ENSRNOG00000013055	Zfyve16	2:22062492-22105710	3.17275	0.0396323	7.11418	7.08492e-08	8.95991e-06
ENSRNOT00000010333	Col27a1-201	ENSRNOG00000007657	Col27a1	5:79055521-79170765	8.56937	0.661272	4.49928	7.31241e-08	9.18737e-06
TCONS_00157483	TCONS_00157483	XLOC_122988	XLOC_122988	17:2279389-2380716	23.1624	2.5092	4.02052	7.37251e-08	9.24119e-06
ENSRNOT00000092778	Agbl1-203	ENSRNOG00000022610	Agbl1	1:137799185-138711126	0	0.0606747	-14.2871	7.43807e-08	9.30159e-06
ENSRNOT00000013116	Cyp7b1-201	ENSRNOG00000009730	Cyp7b1	2:102701903-102871257	0.697747	24.881	-4.35576	7.57822e-08	9.45475e-06
ENSRNOT00000023239	Prss23-201	ENSRNOG00000017307	Prss23	1:153732534-153740905	273.869	29.2935	4.02568	7.64324e-08	9.49583e-06
ENSRNOT00000025934	Synpo-201	ENSRNOG00000019181	Synpo	18:55865467-55916220	0.773203	0	14.6283	7.80237e-08	9.66681e-06
ENSRNOT00000011945	Gpnmb-201	ENSRNOG00000008816	Gpnmb	4:78694447-78715683	6.53955	184.131	-4.00657	8.01641e-08	9.88622e-06
ENSRNOT00000001310	Pdap1-201	ENSRNOG00000000990	Pdap1	12:11240761-11251004	30.1946	1.1769	5.48437	8.06829e-08	9.92734e-06
ENSRNOT00000065811	Gipc2-201	ENSRNOG00000042152	Gipc2	2:257293167-257376756	0.387115	0	14.3171	8.60725e-08	1.05482e-05
ENSRNOT00000024023	Bdp1-201	ENSRNOG00000017864	Bdp1	2:30250633-30340103	0.362147	0	14.324	8.67311e-08	1.05984e-05
ENSRNOT00000015166	Prag1-201	ENSRNOG00000011407	Prag1	16:59666775-59721227	110.588	14.4755	3.73942	9.14607e-08	1.10919e-05
ENSRNOT00000085201	Bgn-201	ENSRNOG00000055962	Bgn	X:157319046-157331204	1499.93	206.023	3.66775	9.15983e-08	1.10919e-05
ENSRNOT00000006947	Mapt-201	ENSRNOG00000005133	Mapt	10:92288910-92386517	0.0104487	8.60689	-8.91888	9.4663e-08	1.14371e-05
ENSRNOT00000017385	C1qa-201	ENSRNOG00000012807	C1qa	5:155261250-155264143	0	18.7889	-14.2582	9.52381e-08	1.14678e-05
TCONS_00198559	TCONS_00198559	XLOC_156879	XLOC_156879	2:182113354-182319003	0.0348803	2.63846	-5.44554	9.55845e-08	1.14708e-05
ENSRNOT00000036666	Myo1c-201	ENSRNOG00000004072	Myo1c	10:63803309-63819614	137.951	15.5391	3.95776	1.0065e-07	1.19824e-05
ENSRNOT00000025669	Mt3-201	ENSRNOG00000018958	Mt3	19:11324698-11326139	25.5881	1008.15	-4.49466	1.04146e-07	1.23597e-05
ENSRNOT00000009705	Slc6a1-201	ENSRNOG00000006527	Slc6a1	4:146276862-146292213	0.002511	10.5732	-11.033	1.0567e-07	1.25128e-05
ENSRNOT00000017217	LOC108348074-201	ENSRNOG00000039197	LOC108348074	5:64476317-64542645	11.8113	0.847727	4.61509	1.0734e-07	1.26545e-05
ENSRNOT00000089615	Supt6h-202	ENSRNOG00000012240	Supt6h	10:65471106-65502936	5.09263	0.0293273	8.24563	1.1623e-07	1.36425e-05
ENSRNOT00000064282	Pamr1-201	ENSRNOG00000005348	Pamr1	3:92403582-92502089	0.621819	20.7681	-4.25581	1.1689e-07	1.36899e-05
ENSRNOT00000089235	Mpdz-202	ENSRNOG00000007894	Mpdz	5:99413187-99566318	0.110749	6.32217	-5.02891	1.18171e-07	1.37815e-05
ENSRNOT00000046215	Rai14-202	ENSRNOG00000028872	Rai14	2:60546091-60683451	49.9781	6.70782	3.70326	1.18186e-07	1.37815e-05
ENSRNOT00000020272	Slc1a1-201	ENSRNOG00000014816	Slc1a1	1:246954980-247037056	0.949051	29.6051	-4.16378	1.29022e-07	1.49797e-05
ENSRNOT00000027064	Gmppa-201	ENSRNOG00000019946	Gmppa	9:82632384-82639810	30.2105	0.0306803	10.6687	1.29529e-07	1.50061e-05
ENSRNOT00000086352	Col5a1-202	ENSRNOG00000008749	Col5a1	3:6430201-6571377	89.029	11.7648	3.72599	1.33571e-07	1.54408e-05
ENSRNOT00000013623	Slc17a9-201	ENSRNOG00000010275	Slc17a9	3:176230378-176246953	11.1525	0.263706	6.19825	1.37513e-07	1.58282e-05
ENSRNOT00000015327	Tpd52-201	ENSRNOG00000011441	Tpd52	2:95008477-95039076	11.535	0	17.8009	1.39184e-07	1.59519e-05
ENSRNOT00000049961	Kcnq2-201	ENSRNOG00000011624	Kcnq2	3:176589906-176644951	0	0.938693	-14.1754	1.45932e-07	1.66185e-05
ENSRNOT00000088795	Actn1-202	ENSRNOG00000056756	Actn1	6:103376557-103470501	200.593	28.7219	3.60994	1.55208e-07	1.76373e-05
ENSRNOT00000087857	Crispld2-203	ENSRNOG00000016752	Crispld2	19:52647143-52704098	0.546348	0	14.2724	1.57245e-07	1.7831e-05
ENSRNOT00000066165	Kdm4a-201	ENSRNOG00000019956	Kdm4a	5:136967650-137014375	0	13.8644	-17.8122	1.58822e-07	1.79718e-05
ENSRNOT00000002996	Ociad1-201	ENSRNOG00000002205	Ociad1	14:37458029-37475418	19.3024	0	17.7348	1.65945e-07	1.87381e-05
ENSRNOT00000002883	Fam114a1-201	ENSRNOG00000026504	Fam114a1	14:44943172-45002719	45.3583	5.7379	3.79174	1.69141e-07	1.90588e-05
ENSRNOT00000064263	Limch1-201	ENSRNOG00000002318	Limch1	14:42762587-43072843	38.9845	5.69643	3.58171	1.71156e-07	1.92453e-05
ENSRNOT00000077477	Rin3-202	ENSRNOG00000007062	Rin3	6:126170911-126279561	13.8288	1.35934	4.14795	1.83499e-07	2.0504e-05
ENSRNOT00000029526	Sgo2-201	ENSRNOG00000027035	Sgo2	9:64898459-64922821	1.13854	0	14.1023	1.86568e-07	2.08035e-05
ENSRNOT00000009696	Fbln2-201	ENSRNOG00000007338	Fbln2	4:122835436-122895121	1853.26	274.395	3.56178	1.93222e-07	2.14561e-05
ENSRNOT00000004329	H3f3a-201	ENSRNOG00000003220	H3f3a	13:99091763-99101208	0.29012	368.825	-9.48825	2.00267e-07	2.21465e-05
ENSRNOT00000059735	Ccdc80-201	ENSRNOG00000002052	Ccdc80	11:60645086-60679555	331.57	49.6265	3.54333	2.19765e-07	2.40754e-05
ENSRNOT00000007771	Creb3l1-201	ENSRNOG00000005413	Creb3l1	3:80892435-80933283	11.8649	0.725055	4.84234	2.19959e-07	2.40754e-05
ENSRNOT00000075427	Nkain2-202	ENSRNOG00000029608	Nkain2	1:27476375-28159290	0	0.969312	-17.845	2.29312e-07	2.50479e-05
ENSRNOT00000078818	Erg-203	ENSRNOG00000001652	Erg	11:35646428-35749464	0.27614	0	14.1386	2.34666e-07	2.55285e-05
ENSRNOT00000010462	Nrdc-202	ENSRNOG00000007111	Nrdc	5:128629942-128694060	0.450496	18.3313	-4.54576	2.37828e-07	2.582e-05
ENSRNOT00000075952	Palm2-201	ENSRNOG00000025558	Palm2	5:74649765-74788497	4.25645	0.208342	5.16602	2.39827e-07	2.59844e-05
ENSRNOT00000089057	Drd3-201	ENSRNOG00000060806	Drd3	11:61822077-61874327	0	0.898854	-14.0482	2.43399e-07	2.62984e-05
ENSRNOT00000003320	Fam129a-201	ENSRNOG00000002403	Fam129a	13:68949665-69101588	49.0918	6.91979	3.62909	2.44038e-07	2.62984e-05
ENSRNOT00000016749	Cpne4-201	ENSRNOG00000026577	Cpne4	8:113105814-113586418	0	0.099829	-14.0708	2.442e-07	2.62984e-05
ENSRNOT00000012334	Col5a1-201	ENSRNOG00000008749	Col5a1	3:6430589-6578882	64.3388	8.89812	3.66607	2.51615e-07	2.70098e-05
ENSRNOT00000021630	Wfdc1-201	ENSRNOG00000015904	Wfdc1	19:52313795-52332697	104.004	12.4575	3.86763	2.66049e-07	2.84795e-05
ENSRNOT00000012532	Dnase1l3-201	ENSRNOG00000009291	Dnase1l3	15:18710492-18736473	1.03629	0	14.031	2.74158e-07	2.92306e-05
ENSRNOT00000058143	Atp1a2-201	ENSRNOG00000007290	Atp1a2	13:90651686-90676629	1.65615	58.2854	-4.33266	2.81527e-07	2.99566e-05
ENSRNOT00000090360	Ccm2-202	ENSRNOG00000060825	Ccm2	14:86813082-86859406	8.92224	0	18.0451	2.90381e-07	3.07156e-05
ENSRNOT00000088323	Adcy6-202	ENSRNOG00000054757	Adcy6	7:140270692-140291620	1.27807	0	14.0476	3.06109e-07	3.21883e-05
ENSRNOT00000049855	Plcb4-203	ENSRNOG00000033119	Plcb4	3:128756799-128970450	1.23449	0	17.3913	3.12383e-07	3.27837e-05
ENSRNOT00000093237	Sfswap-204	ENSRNOG00000000931	Sfswap	12:30740563-30811000	0.513209	0	14.5148	3.13503e-07	3.28368e-05
ENSRNOT00000007984	Tacr1-201	ENSRNOG00000005853	Tacr1	4:113247795-113414504	0	0.28562	-14.0534	3.21754e-07	3.36353e-05
ENSRNOT00000025392	Jph3-201	ENSRNOG00000018784	Jph3	19:54553419-54613477	0.011551	8.01758	-8.57095	3.28488e-07	3.42689e-05
ENSRNOT00000014437	Npvf-201	ENSRNOG00000010806	Npvf	4:80391785-80395502	105.015	2.83276	5.98669	3.41691e-07	3.55113e-05
ENSRNOT00000057537	Sfxn5-201	ENSRNOG00000037871	Sfxn5	4:116993914-117111653	3.032	62.941	-3.5695	3.59282e-07	3.7195e-05
ENSRNOT00000003283	Plp1-201	ENSRNOG00000002419	Plp1	X:107496072-107511348	0.78187	40.9931	-4.91016	3.78853e-07	3.90701e-05
ENSRNOT00000064991	Edil3-201	ENSRNOG00000033064	Edil3	2:17616401-18128512	0.0844283	4.0613	-4.76084	3.8132e-07	3.92488e-05
ENSRNOT00000034096	Fndc3b-201	ENSRNOG00000024089	Fndc3b	2:113112902-113345577	61.8765	9.75633	3.46784	4.03611e-07	4.13841e-05
ENSRNOT00000002091	Gap43-201	ENSRNOG00000001528	Gap43	11:58624198-58717914	0.111613	6.43631	-5.05676	4.04441e-07	4.13898e-05
ENSRNOT00000023101	Haus1-201	ENSRNOG00000017067	Haus1	18:74141481-74151950	2.31715	0	13.8997	4.17535e-07	4.24861e-05
ENSRNOT00000000553	Pfdn6-201	ENSRNOG00000000473	Pfdn6	20:5455974-5457444	16.4638	0	13.8947	4.26186e-07	4.32022e-05
ENSRNOT00000007572	Grm3-201	ENSRNOG00000005519	Grm3	4:21317695-21560490	0.011008	1.32276	-6.08997	4.28963e-07	4.34015e-05
ENSRNOT00000004141	Kif19-201	ENSRNOG00000003105	Kif19	10:103308392-103334466	0.0332937	8.20864	-7.12359	4.31624e-07	4.35883e-05
ENSRNOT00000012739	Src-201	ENSRNOG00000009495	Src	3:153580869-153593765	9.63688	0.184516	6.50585	4.37918e-07	4.41407e-05
ENSRNOT00000092133	Scn1b-203	ENSRNOG00000021102	Scn1b	1:89550738-89559960	2.61751	0	13.8916	4.43319e-07	4.4601e-05
ENSRNOT00000076339	Abcf2-204	ENSRNOG00000010609	Abcf2	4:7122890-7135669	4.70311	0.00258567	11.3962	4.54725e-07	4.5492e-05
ENSRNOT00000036472	Tmem255a-201	ENSRNOG00000028085	Tmem255a	X:124402868-124464963	0.00731933	6.49089	-8.94797	4.81568e-07	4.80876e-05
ENSRNOT00000075628	Vat1l-201	ENSRNOG00000011989	Vat1l	19:46525919-46693838	0.16526	6.20225	-4.42163	4.84992e-07	4.83394e-05
ENSRNOT00000020410	Tmem266-201	ENSRNOG00000015201	Tmem266	8:59900651-60014363	0	0.368482	-13.8863	4.87796e-07	4.85285e-05
ENSRNOT00000010433	Plod1-201	ENSRNOG00000007763	Plod1	5:164720587-164747083	91.2148	12.7817	3.64114	5.0811e-07	5.04556e-05
ENSRNOT00000003687	Cluh-201	ENSRNOG00000002669	Cluh	10:61432819-61453530	0	17.5006	-17.0108	5.49814e-07	5.4395e-05
ENSRNOT00000003770	Gfpt2-201	ENSRNOG00000002810	Gfpt2	10:35279236-35325508	15.9151	1.47293	4.23953	5.55375e-07	5.48438e-05
ENSRNOT00000087088	Dclk2-205	ENSRNOG00000016550	Dclk2	2:186143811-186232292	0.530366	22.3569	-4.57102	5.56664e-07	5.48698e-05
ENSRNOT00000036527	Kiz-201	ENSRNOG00000025141	Kiz	3:141068023-141173858	1.92816	0	16.9353	5.61883e-07	5.52824e-05
ENSRNOT00000013720	Chmp4c-201	ENSRNOG00000010238	Chmp4c	2:93574559-93641497	17.5723	1.9771	3.95873	6.00873e-07	5.90102e-05
ENSRNOT00000037611	Myh9l1-201	ENSRNOG00000049236	Myh9l1	7:118992356-119071712	291.374	49.0642	3.37828	6.18599e-07	6.06397e-05
ENSRNOT00000025019	Cx3cr1-201	ENSRNOG00000018509	Cx3cr1	8:128740756-128754514	0	3.18761	-13.9424	6.23064e-07	6.08544e-05
ENSRNOT00000038066	Tmco6-201	ENSRNOG00000017718	Tmco6	18:29579145-29585740	3.80194	0	13.9405	6.32784e-07	6.16913e-05
ENSRNOT00000084527	Postn-202	ENSRNOG00000012660	Postn	2:143656793-143688085	114.78	17.1529	3.55119	6.35108e-07	6.18053e-05
ENSRNOT00000092748	Ppfia1-203	ENSRNOG00000020857	Ppfia1	1:217644486-217721376	2.64079	0.069741	6.01652	6.40146e-07	6.21592e-05
ENSRNOT00000082958	Agpat4-202	ENSRNOG00000017731	Agpat4	1:48719942-48797631	2.47894	0	16.8745	6.41068e-07	6.21592e-05
ENSRNOT00000087025	Kdm5b-202	ENSRNOG00000060544	Kdm5b	13:51384389-51455357	0	6.20322	-17.2453	6.48366e-07	6.26399e-05
ENSRNOT00000049000	Tpm2-202	ENSRNOG00000016731	Tpm2	5:59016622-59025631	157.511	19.3938	3.82359	6.55663e-07	6.31534e-05
ENSRNOT00000028675	Susd5-201	ENSRNOG00000026951	Susd5	8:122331583-122368368	14.5115	0.901314	4.81884	6.66791e-07	6.38533e-05
ENSRNOT00000091270	Tnrc6b-202	ENSRNOG00000024907	Tnrc6b	7:121930615-122140091	0	1.95822	-17.2013	6.66891e-07	6.38533e-05
TCONS_00198739	TCONS_00198739	XLOC_157021	XLOC_157021	2:184899907-184908347	2.64442	0	13.7821	6.69284e-07	6.3968e-05
ENSRNOT00000042103	Fmn1-201	ENSRNOG00000031760	Fmn1	3:104816987-105086436	0	0.1615	-13.953	6.9222e-07	6.58763e-05
ENSRNOT00000027497	Atp1a3-201	ENSRNOG00000020263	Atp1a3	1:81852429-81881549	0	1.35953	-13.7962	6.92942e-07	6.58763e-05
ENSRNOT00000082161	Cacna2d1-203	ENSRNOG00000033531	Cacna2d1	4:15710802-15859132	0.00110667	2.92376	-10.474	7.08678e-07	6.72528e-05
ENSRNOT00000076571	Zfp326-202	ENSRNOG00000047761	Zfp326	14:4998539-5006594	2.76347	0	13.7753	7.4394e-07	7.02255e-05
ENSRNOT00000029587	Dpysl4-201	ENSRNOG00000027582	Dpysl4	1:211423022-211438531	0.183926	18.2724	-5.83413	7.66561e-07	7.21066e-05
ENSRNOT00000085237	Loxl2-202	ENSRNOG00000016758	Loxl2	15:51303909-51365234	194.432	31.503	3.43356	7.85779e-07	7.36554e-05
ENSRNOT00000072135	Ms4a4a-201	ENSRNOG00000050024	Ms4a4a	1:227592635-227607042	0	2.81652	-13.8307	7.90287e-07	7.39485e-05
ENSRNOT00000058070	Upf2-201	ENSRNOG00000023593	Upf2	17:76184928-76281660	0.00886833	2.36218	-7.20736	7.92666e-07	7.40416e-05
ENSRNOT00000046525	AABR07026805.1-201	ENSRNOG00000027309	AABR07026805.1	17:2201924-2278613	22.9322	3.04856	3.71404	7.94496e-07	7.40833e-05
ENSRNOT00000083407	LOC103694210-201	ENSRNOG00000061132	LOC103694210	18:44029927-44141865	0	0.34515	-13.7594	8.1022e-07	7.54181e-05
ENSRNOT00000064785	Ptprc-205	ENSRNOG00000000655	Ptprc	13:55061562-55173692	0	0.333817	-13.7202	8.19175e-07	7.61193e-05
ENSRNOT00000006930	Kcnq3-201	ENSRNOG00000005206	Kcnq3	7:106717229-106753592	0	1.15324	-13.891	8.37575e-07	7.76289e-05
ENSRNOT00000083164	Malrd1-201	ENSRNOG00000052916	Malrd1	17:82430836-82953864	0	0.0812387	-13.8907	8.537e-07	7.89164e-05
ENSRNOT00000041499	Pik3c2g-201	ENSRNOG00000034228	Pik3c2g	4:173732248-174102496	0.057371	0	13.7037	8.81204e-07	8.11785e-05
ENSRNOT00000073915	Basp1-201	ENSRNOG00000046313	Basp1	2:77586424-77632628	127.99	20.4574	3.4403	9.04367e-07	8.30265e-05
ENSRNOT00000085110	Xiap-203	ENSRNOG00000006967	Xiap	X:128416809-128452969	4.81086	0	16.6974	9.2343e-07	8.46314e-05
ENSRNOT00000036140	Tmed9-201	ENSRNOG00000021882	Tmed9	17:9560761-9565249	268.559	33.0783	3.82884	9.27428e-07	8.48525e-05
ENSRNOT00000077883	Vav3-202	ENSRNOG00000020485	Vav3	2:212257225-212585818	0	0.114915	-13.7238	9.81101e-07	8.90025e-05
ENSRNOT00000055285	Hnrnpa1-201	ENSRNOG00000036839	Hnrnpa1	7:144865623-144871585	24.9225	0.427718	6.64108	9.82764e-07	8.90025e-05
ENSRNOT00000042798	Fnbp1-202	ENSRNOG00000008258	Fnbp1	3:9861237-9936405	11.567	0.87784	4.49684	1.03034e-06	9.28398e-05
ENSRNOT00000064809	Sec24d-201	ENSRNOG00000014872	Sec24d	2:227455722-227562319	70.4461	12.0189	3.36179	1.03866e-06	9.34319e-05
ENSRNOT00000019384	Neto1-201	ENSRNOG00000014006	Neto1	18:83471342-83584357	0.00568133	3.20562	-8.27873	1.04171e-06	9.35493e-05
ENSRNOT00000047669	Cttn-208	ENSRNOG00000050994	Cttn	1:215255381-215290845	10.5427	0	17.8641	1.06756e-06	9.55498e-05
ENSRNOT00000010146	Kcnj10-201	ENSRNOG00000007705	Kcnj10	13:90723092-90752581	3.3242	79.5956	-3.77348	1.09682e-06	9.76789e-05
ENSRNOT00000082084	Cyp7b1-202	ENSRNOG00000009730	Cyp7b1	2:102702689-102838745	0	0.259829	-13.6375	1.11277e-06	9.89351e-05
ENSRNOT00000072411	Sulf1-202	ENSRNOG00000009037	Sulf1	5:5999475-6083083	0.527731	16.0128	-4.11381	1.12495e-06	9.9727e-05
ENSRNOT00000028051	Tgfb1-201	ENSRNOG00000020652	Tgfb1	1:82480195-82497199	57.805	6.61811	3.93422	1.12541e-06	9.9727e-05
ENSRNOT00000087274	Fhl1-205	ENSRNOG00000000875	Fhl1	X:159165169-159172518	0.0253047	59.3997	-10.3878	1.13125e-06	0.000100079
ENSRNOT00000000155	Plxdc2-201	ENSRNOG00000000142	Plxdc2	17:83221827-83610272	69.3577	12.5652	3.26681	1.1359e-06	0.00010013
ENSRNOT00000073967	Nrn1-201	ENSRNOG00000050767	Nrn1	17:27925057-27969433	19.1619	1.93604	4.11028	1.14378e-06	0.000100358
ENSRNOT00000081607	Camk2b-202	ENSRNOG00000052080	Camk2b	14:86208901-86297652	0.0946137	5.23901	-4.9702	1.16125e-06	0.000101411
ENSRNOT00000031935	Hk3-201	ENSRNOG00000026235	Hk3	17:10137974-10152955	0	2.56606	-13.7517	1.16146e-06	0.000101411
ENSRNOT00000013991	Nrg1-201	ENSRNOG00000010392	Nrg1	16:63958645-64057434	14.0615	1.79919	3.76989	1.16377e-06	0.000101447
ENSRNOT00000082090	Cep290-201	ENSRNOG00000056458	Cep290	7:40217269-40306327	0.224614	0	13.6169	1.22216e-06	0.000106191
ENSRNOT00000076032	Kdm5a-203	ENSRNOG00000010591	Kdm5a	4:152945760-152967361	0.934515	0	13.6333	1.26184e-06	0.000109461
ENSRNOT00000092452	Upf2-203	ENSRNOG00000023593	Upf2	17:76260636-76287186	3.81292	0.00526367	10.2596	1.36338e-06	0.000117887
ENSRNOT00000080988	Aldoa-201	ENSRNOG00000052802	Aldoa	1:198228387-198232344	720.723	113.453	3.47431	1.36841e-06	0.000118131
ENSRNOT00000024084	Acta1-201	ENSRNOG00000017786	Acta1	19:56674074-56677084	168.366	14.5323	4.34763	1.41765e-06	0.000121524
ENSRNOT00000084870	Abracl-201	ENSRNOG00000051450	Abracl	1:13165572-13175876	27.6511	1.74549	4.78845	1.44642e-06	0.000123275
ENSRNOT00000077374	Txnrd3-201	ENSRNOG00000059810	Txnrd3	4:121612332-121650541	0.857174	0	14.3623	1.45974e-06	0.000123862
ENSRNOT00000088385	Col15a1-201	ENSRNOG00000060381	Col15a1	5:62840360-62950240	17.2737	2.34727	3.68813	1.46138e-06	0.000123862
ENSRNOT00000019844	Lox-201	ENSRNOG00000014426	Lox	18:47503350-47577819	2.7094	0.081891	5.86692	1.514e-06	0.000127212
TCONS_00101675	TCONS_00101675	XLOC_077075	XLOC_077075	13:80582052-80614909	0.582744	0	13.5684	1.53715e-06	0.000128753
ENSRNOT00000089402	Tuft1-203	ENSRNOG00000020923	Tuft1	2:195863287-195907450	0.463584	0	13.6642	1.57334e-06	0.000131372
ENSRNOT00000038222	Pla2g7-201	ENSRNOG00000025691	Pla2g7	9:19935768-19978013	1.76252	45.7571	-3.88606	1.57746e-06	0.000131512
ENSRNOT00000078017	LOC103689977-201	ENSRNOG00000052613	LOC103689977	2:235341365-235353967	1.61112	0	13.6396	1.58914e-06	0.000132279
ENSRNOT00000028075	Ccdc51-201	ENSRNOG00000020688	Ccdc51	8:117820538-117830842	1.86508	0	13.5481	1.63014e-06	0.000135481
ENSRNOT00000008087	Cngb3-201	ENSRNOG00000006084	Cngb3	5:33097654-33507467	0.047529	0	13.5693	1.6392e-06	0.000135812
ENSRNOT00000067984	Pdia5-201	ENSRNOG00000032327	Pdia5	11:68493035-68578995	9.78892	0.795558	4.41983	1.71956e-06	0.000141964
ENSRNOT00000047666	Ncam1-202	ENSRNOG00000031890	Ncam1	8:53839683-53901358	113.825	20.7144	3.26658	1.75693e-06	0.000144006
ENSRNOT00000036273	Kif16b-201	ENSRNOG00000004951	Kif16b	3:136657814-136936650	0.7903	0	17.1367	1.85137e-06	0.000151079
ENSRNOT00000024459	Sv2c-201	ENSRNOG00000018094	Sv2c	2:26501833-26699333	0.848616	17.193	-3.53003	1.85239e-06	0.000151079
ENSRNOT00000093672	Sla-205	ENSRNOG00000056714	Sla	7:107584118-107634287	0	0.661115	-13.5469	1.86494e-06	0.000151698
ENSRNOT00000020144	Il1rl1-202	ENSRNOG00000014835	Il1rl1	9:47165342-47174710	22.379	1.09764	5.15714	1.88854e-06	0.000153385
ENSRNOT00000083555	Papss2-202	ENSRNOG00000011068	Papss2	1:251145253-251229303	9.58798	0.474338	5.16261	1.94766e-06	0.000157231
TCONS_00157239	TCONS_00157239	XLOC_122801	XLOC_122801	17:65435-348520	0.463919	0	16.2966	1.97436e-06	0.000159147
ENSRNOT00000002837	Rest-201	ENSRNOG00000002074	Rest	14:33135413-33150509	8.68591	0.0137997	10.0402	1.98591e-06	0.000159738
ENSRNOT00000090970	Ccpg1-202	ENSRNOG00000053428	Ccpg1	8:79660657-79692039	0.575308	0	13.4772	2.08139e-06	0.000166272
ENSRNOT00000073011	Hdgfl2-201	ENSRNOG00000049142	Hdgfl2	9:10972351-10991820	23.3912	2.04548	4.32048	2.08572e-06	0.000166369
ENSRNOT00000044313	Slc39a12-201	ENSRNOG00000025639	Slc39a12	17:81455955-81541759	0.725927	18.4165	-3.86436	2.1189e-06	0.000168264
ENSRNOT00000039400	Mzt1-201	ENSRNOG00000024813	Mzt1	15:83431178-83442008	1.66474	0	13.4626	2.12748e-06	0.000168695
ENSRNOT00000046208	Usf3-201	ENSRNOG00000027756	Usf3	11:61432904-61499557	2.25839	0.012385	8.32014	2.16031e-06	0.000171045
ENSRNOT00000028176	Snrnp70-201	ENSRNOG00000020763	Snrnp70	1:101367471-101388125	20.7485	1.4929	4.59849	2.19393e-06	0.000172919
ENSRNOT00000004950	Prrx1-201	ENSRNOG00000003720	Prrx1	13:81147348-81214494	15.3303	1.83237	3.87438	2.19582e-06	0.000172919
TCONS_00324943	TCONS_00324943	XLOC_258016	XLOC_258016	6:145387883-145437910	0	0.65551	-13.5341	2.19691e-06	0.000172919
ENSRNOT00000087861	Vars-204	ENSRNOG00000000867	Vars	20:4993690-5008255	0	16.4079	-16.3794	2.22297e-06	0.000174714
ENSRNOT00000013393	S100a11-201	ENSRNOG00000010105	S100a11	2:193866951-193868502	1577.54	254.556	3.43543	2.24161e-06	0.00017592
ENSRNOT00000070897	P4ha1-201	ENSRNOG00000050655	P4ha1	20:28920616-28971966	165.18	31.1439	3.21163	2.2956e-06	0.000178846
ENSRNOT00000007004	Fbln5-201	ENSRNOG00000050539	Fbln5	6:125644804-125723944	465.787	91.599	3.15269	2.31174e-06	0.000179842
ENSRNOT00000092629	Brpf3-206	ENSRNOG00000028641	Brpf3	20:6054199-6084771	0.599295	0	13.5083	2.32164e-06	0.00018035
ENSRNOT00000033200	Clip2-201	ENSRNOG00000021611	Clip2	12:25173005-25237009	0.196845	10.4235	-4.88984	2.33054e-06	0.000180779
ENSRNOT00000080783	Wscd2-201	ENSRNOG00000053045	Wscd2	12:48817320-48857724	30.4634	4.18387	3.67363	2.34532e-06	0.000181138
ENSRNOT00000068150	Aqp4-202	ENSRNOG00000016043	Aqp4	18:6766009-6782757	8.11503	173.855	-3.61257	2.40047e-06	0.000184598
ENSRNOT00000081770	Safb-202	ENSRNOG00000050543	Safb	9:10450235-10462491	1.43147	0	13.4248	2.41679e-06	0.000185587
TCONS_00299187	TCONS_00299187	XLOC_237553	XLOC_237553	5:155885958-155914986	250.984	47.1967	3.21848	2.43724e-06	0.000186889
ENSRNOT00000032685	Drc3-201	ENSRNOG00000021303	Drc3	10:46722109-46762250	37.9017	5.44696	3.59947	2.45432e-06	0.00018793
ENSRNOT00000083002	Hectd2-201	ENSRNOG00000056753	Hectd2	1:255185629-255254181	0	3.19418	-16.2446	2.48288e-06	0.000189304
ENSRNOT00000068102	Dctn1-201	ENSRNOG00000010048	Dctn1	4:114876770-114896566	0.60022	27.5023	-4.72779	2.48763e-06	0.000189396
ENSRNOT00000022983	Serpinh1-201	ENSRNOG00000016831	Serpinh1	1:164301010-164308317	1516.32	294.897	3.16852	2.51136e-06	0.000190931
ENSRNOT00000039864	Drp2-201	ENSRNOG00000026704	Drp2	X:105239840-105286052	0	1.48914	-14.5666	2.57704e-06	0.000194557
ENSRNOT00000074572	Slc14a1-202	ENSRNOG00000016753	Slc14a1	18:74461055-74478341	5.61458	122.197	-3.63804	2.61778e-06	0.00019734
ENSRNOT00000080787	Ubap2-202	ENSRNOG00000052087	Ubap2	5:57534695-57632177	19.7519	3.09584	3.47498	2.63128e-06	0.000198079
ENSRNOT00000027756	Fads2-201	ENSRNOG00000020440	Fads2	1:226114413-226152524	266.08	51.8891	3.16333	2.67724e-06	0.000200692
ENSRNOT00000037681	Nfam1-201	ENSRNOG00000022975	Nfam1	7:123856567-123892429	0	0.884237	-13.4817	2.69484e-06	0.000201728
ENSRNOT00000035821	Slc1a3-202	ENSRNOG00000016163	Slc1a3	2:57860883-57935363	30.1531	465.835	-3.14804	2.7988e-06	0.000209218
ENSRNOT00000080485	Raly-202	ENSRNOG00000017405	Raly	3:150323224-150387332	62.8579	11.3409	3.28311	2.8746e-06	0.000214585
ENSRNOT00000026793	Cadm4-201	ENSRNOG00000024243	Cadm4	1:81365138-81370109	449.836	75.7346	3.37498	2.93676e-06	0.000218919
ENSRNOT00000015270	Igfbpl1-201	ENSRNOG00000011320	Igfbpl1	5:61395408-61410812	0	1.98509	-13.4226	2.99285e-06	0.000222481
ENSRNOT00000027616	Bag3-201	ENSRNOG00000020298	Bag3	1:199941161-199965191	41.1305	5.14335	3.80861	3.06796e-06	0.000226804
ENSRNOT00000089243	Grb14-201	ENSRNOG00000052498	Grb14	3:50937669-51054378	29.5403	5.33161	3.27432	3.12685e-06	0.000230521
ENSRNOT00000082429	Vdr-201	ENSRNOG00000054420	Vdr	7:139342063-139394166	17.2862	2.12299	3.83344	3.1848e-06	0.000234471
ENSRNOT00000085808	Plod2-203	ENSRNOG00000030183	Plod2	8:99977334-100059728	96.1467	10.0664	4.07962	3.19274e-06	0.000234732
ENSRNOT00000044092	Kif21a-202	ENSRNOG00000014844	Kif21a	7:132071116-132143470	1.4837	0	16.0297	3.27325e-06	0.000240322
ENSRNOT00000015181	Tenm4-201	ENSRNOG00000011151	Tenm4	1:161401527-161880923	0.0217223	0.947695	-4.63262	3.36327e-06	0.00024373
ENSRNOT00000013531	Pkp1-201	ENSRNOG00000010076	Pkp1	13:52705174-52752997	10.428	1.01145	4.17684	3.3634e-06	0.00024373
ENSRNOT00000057735	Stum-201	ENSRNOG00000037960	Stum	13:98724295-98772968	0	0.718652	-13.6041	3.36522e-06	0.00024373
ENSRNOT00000079138	Lama2-202	ENSRNOG00000011134	Lama2	1:18491384-19143269	0.323833	5.83463	-3.37302	3.40273e-06	0.00024545
ENSRNOT00000064706	Plekha7-201	ENSRNOG00000024602	Plekha7	1:185427736-185487594	4.85101	0.122122	6.10146	3.47504e-06	0.000249993
ENSRNOT00000092233	Aimp2-202	ENSRNOG00000001044	Aimp2	12:12738812-12747961	1.797	0	13.3533	3.53405e-06	0.000253217
ENSRNOT00000034305	Arhgap23-201	ENSRNOG00000022771	Arhgap23	10:85384881-85444556	34.0381	5.77647	3.36565	3.62015e-06	0.000258844
ENSRNOT00000024418	Cnksr3-201	ENSRNOG00000018052	Cnksr3	1:43789791-43884267	30.774	5.59548	3.26484	3.62709e-06	0.000258844
ENSRNOT00000031370	Stk32a-201	ENSRNOG00000027066	Stk32a	18:37597156-37710306	1.1077	21.4787	-3.47302	3.83759e-06	0.000272775
ENSRNOT00000004191	Btbd17-201	ENSRNOG00000003109	Btbd17	10:103334052-103340922	0.0670477	16.8411	-7.1174	3.86549e-06	0.000274393
ENSRNOT00000019554	Anxa5-201	ENSRNOG00000014453	Anxa5	2:123162461-123193130	401.48	80.0803	3.12981	3.90885e-06	0.000276737
ENSRNOT00000009693	Map3k9-201	ENSRNOG00000007271	Map3k9	6:105459882-105518725	0.637969	0	14.5007	3.92371e-06	0.000277423
ENSRNOT00000089564	NEWGENE_621351-202	ENSRNOG00000052925	NEWGENE_621351	4:29529854-29564435	1013.6	3.19692	9.11375	3.9868e-06	0.000281153
ENSRNOT00000012600	Tbc1d4-201	ENSRNOG00000009431	Tbc1d4	15:85930044-86105273	0.000444333	0.787059	-10.0014	3.98851e-06	0.000281153
ENSRNOT00000084134	Runx1-202	ENSRNOG00000001704	Runx1	11:32769219-33003021	0.416083	0	15.9364	3.99224e-06	0.000281153
ENSRNOT00000038433	Slitrk6-201	ENSRNOG00000022337	Slitrk6	15:95507640-95514259	14.3278	0.308871	6.33332	4.00654e-06	0.000281578
ENSRNOT00000048446	Fam83h-201	ENSRNOG00000030264	Fam83h	7:117062748-117070936	1.90831	0	13.2674	4.02051e-06	0.000282031
ENSRNOT00000046135	Lcp2-201	ENSRNOG00000005620	Lcp2	10:18996523-19043286	0	0.617235	-13.3366	4.03654e-06	0.000282785
ENSRNOT00000045048	Sytl2-201	ENSRNOG00000030776	Sytl2	1:154579949-154599430	6.92854	0.0135097	9.81162	4.04389e-06	0.00028293
ENSRNOT00000090588	Stra6-202	ENSRNOG00000008312	Stra6	8:62925376-62943788	0	1.48837	-13.2686	4.0731e-06	0.000284601
ENSRNOT00000045127	Mapt-203	ENSRNOG00000005133	Mapt	10:92288956-92382691	0	0.291233	-13.2653	4.08145e-06	0.000284813
ENSRNOT00000022319	Slc1a3-201	ENSRNOG00000016163	Slc1a3	2:57860834-57935334	3.8347	73.486	-3.44412	4.16808e-06	0.000290479
ENSRNOT00000013701	Cd28-201	ENSRNOG00000010283	Cd28	9:67546408-67571871	0.614051	0	13.2724	4.31472e-06	0.000299918
ENSRNOT00000013732	Il6-201	ENSRNOG00000010278	Il6	4:3043231-3047807	3.37123	0	13.2483	4.36855e-06	0.000303265
ENSRNOT00000008971	Itga11-201	ENSRNOG00000006723	Itga11	8:67615635-67683973	34.2884	6.10328	3.29963	4.42794e-06	0.00030699
ENSRNOT00000011682	Rbms1-201	ENSRNOG00000008482	Rbms1	3:46803355-47025128	9.33599	1.25889	3.68882	4.45002e-06	0.000307729
ENSRNOT00000002411	Tnk2-201	ENSRNOG00000001769	Tnk2	11:71348727-71387992	12.4721	0.0227903	9.85083	4.55685e-06	0.000313089
ENSRNOT00000017338	Creb3l2-201	ENSRNOG00000012826	Creb3l2	4:64869026-64981384	75.0578	15.4956	3.08304	4.56722e-06	0.000313399
ENSRNOT00000028883	Rassf2-201	ENSRNOG00000021261	Rassf2	3:124575621-124610267	0.420848	15.9146	-4.42521	4.65931e-06	0.000318901
ENSRNOT00000078473	Tmem176b-202	ENSRNOG00000008465	Tmem176b	4:78450724-78458179	1.78409	77.429	-4.61908	4.77595e-06	0.000326467
ENSRNOT00000021193	Bcat1-201	ENSRNOG00000015514	Bcat1	4:179259310-179307095	135.404	26.3901	3.17389	4.84418e-06	0.000330287
ENSRNOT00000072627	Cdkl5-202	ENSRNOG00000003742	Cdkl5	X:35599258-35771711	0	1.04542	-15.9604	4.88596e-06	0.000332299
ENSRNOT00000036642	Rbms3-201	ENSRNOG00000025881	Rbms3	8:124840160-125544427	2.49451	0.00337233	10.3588	4.88611e-06	0.000332299
ENSRNOT00000091894	Pknox2-206	ENSRNOG00000028856	Pknox2	8:39361698-39551700	1.10112	0	16.9273	4.91694e-06	0.000333972
ENSRNOT00000003268	LOC102553715-201	ENSRNOG00000002382	LOC102553715	10:47765783-47768483	65.6372	3.31998	5.09331	5.06138e-06	0.000342046
ENSRNOT00000093348	Il1rapl2-201	ENSRNOG00000062221	Il1rapl2	X:108287068-109851047	0.009549	0	13.1951	5.2388e-06	0.0003527
ENSRNOT00000051680	Sept5-202	ENSRNOG00000029912	2021-09-05	11:86512797-86519915	2.14104	0	13.2326	5.24692e-06	0.000352702
ENSRNOT00000055464	Copz2-201	ENSRNOG00000009225	Copz2	10:84718824-84731880	98.1412	15.3382	3.48311	5.25201e-06	0.000352702
ENSRNOT00000083127	Mitf-202	ENSRNOG00000008658	Mitf	4:130332076-130425532	1.67069	0.07626	5.25065	5.32313e-06	0.00035703
ENSRNOT00000064702	Eef1akmt1-201	ENSRNOG00000009849	Eef1akmt1	15:37813117-37826211	6.8597	0	15.7865	5.38331e-06	0.000359926
TCONS_00101672	TCONS_00101672	XLOC_077075	XLOC_077075	13:80582052-80614903	0.444995	0	13.1699	5.49851e-06	0.000366496
ENSRNOT00000049891	Tmem176a-201	ENSRNOG00000023708	Tmem176a	4:78458625-78462423	1.28631	78.2	-5.10731	5.51827e-06	0.000367356
ENSRNOT00000081470	Zdhhc18-201	ENSRNOG00000058156	Zdhhc18	5:151831527-151856256	13.8004	1.22682	4.29477	5.53192e-06	0.000367808
ENSRNOT00000008826	Hpgds-201	ENSRNOG00000006583	Hpgds	4:95946025-95970666	0	1.09565	-13.2524	5.61699e-06	0.000372538
ENSRNOT00000010183	Padi2-201	ENSRNOG00000007574	Padi2	5:159428515-159471144	0.914664	24.7401	-3.94717	5.62847e-06	0.000372621
ENSRNOT00000089609	Capsl-201	ENSRNOG00000054277	Capsl	2:58724855-58747843	0	1.10565	-13.1625	5.63216e-06	0.000372621
ENSRNOT00000003248	Uchl1-201	ENSRNOG00000002343	Uchl1	14:43133218-43143973	443.874	89.0443	3.12542	5.69483e-06	0.000375375
ENSRNOT00000057386	Col4a1-201	ENSRNOG00000016281	Col4a1	16:83522162-83632153	241.151	50.7043	3.05679	5.77909e-06	0.000379993
TCONS_00198555	TCONS_00198555	XLOC_156879	XLOC_156879	2:182089823-182253189	0	1.00945	-15.8338	5.7887e-06	0.000380158
ENSRNOT00000013817	Slc25a13-201	ENSRNOG00000009957	Slc25a13	4:31608269-31730386	12.7573	2.10122	3.4102	5.96756e-06	0.000389514
ENSRNOT00000089358	Slc44a5-202	ENSRNOG00000042332	Slc44a5	2:260249566-260535721	0.0110833	0.873249	-5.51503	5.99094e-06	0.000390089
ENSRNOT00000083468	Acta2-201	ENSRNOG00000058039	Acta2	1:252537615-252550394	5209.52	1126.14	3.02039	6.08715e-06	0.000394492
ENSRNOT00000006754	Rpl7a-202	ENSRNOG00000049097	Rpl7a	3:4867233-4869656	277.265	30.5766	3.9905	6.08805e-06	0.000394492
ENSRNOT00000087113	Clec12a-201	ENSRNOG00000054860	Clec12a	4:163112301-163126864	0	1.75721	-13.1725	6.1187e-06	0.000395999
ENSRNOT00000019966	Hs6st1-201	ENSRNOG00000014516	Hs6st1	9:42620006-42659184	36.5717	6.12283	3.38721	6.17216e-06	0.000397913
ENSRNOT00000059459	Dctd-202	ENSRNOG00000013215	Dctd	16:47177148-47207487	0.5061	0	13.22	6.33901e-06	0.000406747
ENSRNOT00000022185	Vps13d-201	ENSRNOG00000016443	Vps13d	5:162891451-163119239	0.0162323	4.74107	-7.35842	6.34556e-06	0.000406747
ENSRNOT00000026854	Gmppb-201	ENSRNOG00000037229	Gmppb	8:116826680-116856159	38.0619	5.87511	3.50282	6.38729e-06	0.000408932
ENSRNOT00000021915	Cd4-201	ENSRNOG00000016294	Cd4	4:157383052-157408176	0	1.0083	-13.1497	6.46317e-06	0.000412802
ENSRNOT00000079824	Actn1-201	ENSRNOG00000056756	Actn1	6:103375873-103470555	192.121	41.4086	3.01897	6.53514e-06	0.000416405
ENSRNOT00000084185	Ntn4-202	ENSRNOG00000005573	Ntn4	7:34533584-34649481	37.6661	7.71556	3.09439	6.70051e-06	0.000425106
ENSRNOT00000039580	Jazf1-201	ENSRNOG00000027026	Jazf1	4:82836260-83137527	18.7755	3.53514	3.20837	6.70346e-06	0.000425106
ENSRNOT00000085362	Myom1-201	ENSRNOG00000057701	Myom1	9:119353840-119468715	1.76746	0.112657	4.77051	6.80209e-06	0.000430341
ENSRNOT00000023163	Atp11a-201	ENSRNOG00000017154	Atp11a	16:81990340-82100222	7.80261	0.643778	4.39797	6.88943e-06	0.000434838
ENSRNOT00000005195	Cep350-201	ENSRNOG00000003882	Cep350	13:73561498-73638073	1.10597	0	15.685	6.92866e-06	0.000436286
ENSRNOT00000002717	Kcne1-201	ENSRNOG00000001984	Kcne1	11:32498261-32508420	1.35342	0	13.0855	6.99436e-06	0.000439905
ENSRNOT00000083481	Asns-202	ENSRNOG00000007546	Asns	4:33743366-33760716	7.10859	0.0129813	9.828	7.14485e-06	0.000447791
ENSRNOT00000080517	Dock11-202	ENSRNOG00000013321	Dock11	X:122507418-122690465	0	0.873444	-15.8443	7.18797e-06	0.000449967
ENSRNOT00000080024	Ncald-202	ENSRNOG00000042978	Ncald	7:76199311-76488216	2.39283	0.00455567	9.8459	7.19878e-06	0.000450117
ENSRNOT00000078786	Chd9-207	ENSRNOG00000049302	Chd9	19:17370253-17494516	0.00643133	2.43491	-7.7877	7.2868e-06	0.000455089
ENSRNOT00000021717	Setbp1-201	ENSRNOG00000016208	Setbp1	18:75095632-75207306	10.5093	1.62142	3.51139	7.41295e-06	0.00046189
ENSRNOT00000032123	Hrasls5-201	ENSRNOG00000023528	Hrasls5	1:222907159-222937633	0.448187	0	13.0692	7.43071e-06	0.000462458
ENSRNOT00000002568	Med15-201	ENSRNOG00000001877	Med15	11:87553868-87628502	11.8983	0.115801	7.46692	7.72036e-06	0.000477707
ENSRNOT00000028079	Tmem216-201	ENSRNOG00000020692	Tmem216	1:226601201-226606344	5.03096	0.00342433	10.7371	7.87537e-06	0.000486736
ENSRNOT00000090197	Epha3-202	ENSRNOG00000030285	Epha3	11:421135-768644	0.160737	3.73594	-3.73542	7.93123e-06	0.000489315
ENSRNOT00000006403	Rock2-201	ENSRNOG00000004496	Rock2	6:42180894-42286970	0.125939	0	13.0391	7.93538e-06	0.000489315
ENSRNOT00000092916	Cttn-205	ENSRNOG00000047280	Cttn	1:217602698-217638152	20.4188	0.124865	8.13066	7.96674e-06	0.000490684
ENSRNOT00000005647	Sdccag8-201	ENSRNOG00000004181	Sdccag8	13:94888174-95076568	1.6322	0.0630333	5.51185	8.00365e-06	0.00049239
ENSRNOT00000086603	Rbx1-201	ENSRNOG00000058914	Rbx1	7:122700854-122709935	113.933	16.7906	3.57094	8.17511e-06	0.00050121
ENSRNOT00000024240	Sidt2-201	ENSRNOG00000017871	Sidt2	8:50230339-50246656	887.68	179.949	3.10252	8.3359e-06	0.000510483
ENSRNOT00000026187	Gata3-201	ENSRNOG00000019336	Gata3	17:72429618-72450681	0.62882	0	13.0353	8.40868e-06	0.000514352
ENSRNOT00000003658	Nme1-201	ENSRNOG00000002693	Nme1	10:81657153-81666523	101.997	15.1508	3.55854	8.44836e-06	0.000515694
ENSRNOT00000019501	Ccn1-201	ENSRNOG00000014350	Ccn1	2:251529354-251532312	700.005	131.907	3.21343	8.48593e-06	0.000516677
ENSRNOT00000016341	Golga2-201	ENSRNOG00000011884	Golga2	3:11317328-11336379	7.95638	0.289576	5.59662	8.49495e-06	0.000516677
ENSRNOT00000091697	Sptan1-205	ENSRNOG00000015396	Sptan1	3:8547349-8598918	3.74484	0.021047	8.25616	8.56062e-06	0.00052008
ENSRNOT00000044009	Maob-201	ENSRNOG00000029778	Maob	X:6430594-6533534	0.457411	10.9786	-3.77741	8.67863e-06	0.000526651
ENSRNOT00000087107	Foxp4-202	ENSRNOG00000022804	Foxp4	9:15068405-15125318	5.80138	0.501964	4.33592	8.70891e-06	0.00052789
ENSRNOT00000001315	Arpc1b-201	ENSRNOG00000000991	Arpc1b	12:11252296-11265865	258.094	53.2728	3.08405	8.73011e-06	0.000528577
ENSRNOT00000091541	Fcgr2b-203	ENSRNOG00000046452	Fcgr2b	13:89327794-89433815	0	0.256963	-13.2697	8.87601e-06	0.000536197
ENSRNOT00000025826	LOC100911615-201	ENSRNOG00000047551	LOC100911615	1:213997709-214002815	10.5859	0.0164607	10.0119	8.92297e-06	0.000538426
ENSRNOT00000026637	Vegfa-202	ENSRNOG00000019598	Vegfa	9:17340341-17355681	0.858187	0	13.0017	9.24322e-06	0.000557123
ENSRNOT00000018116	Col9a1-201	ENSRNOG00000012920	Col9a1	9:30419001-30502298	7.66631	0.0799313	7.36915	9.31476e-06	0.000560441
ENSRNOT00000044081	App-201	ENSRNOG00000006997	App	11:24425813-24641820	24.3155	5.28327	3.00678	9.3618e-06	0.00056237
ENSRNOT00000086062	Col2a1-201	ENSRNOG00000058560	Col2a1	7:139455242-139483997	3.67049	0.102871	5.96425	9.4021e-06	0.000564157
ENSRNOT00000050832	Synm-201	ENSRNOG00000014030	Synm	1:128692120-128722048	0.190906	11.3266	-5.10919	9.54465e-06	0.00057207
ENSRNOT00000029072	Clec4a1-201	ENSRNOG00000042139	Clec4a1	4:155947453-155959993	0	1.87452	-13.0461	9.56318e-06	0.000572539
ENSRNOT00000002827	Olig1-201	ENSRNOG00000028648	Olig1	11:31428358-31430517	1.41318	104.925	-5.40139	9.62943e-06	0.000575219
ENSRNOT00000091571	Rfx4-202	ENSRNOG00000051536	Rfx4	7:25808419-25907846	0.875386	17.4475	-3.52143	9.82547e-06	0.000584971
ENSRNOT00000066004	Dclk2-203	ENSRNOG00000016550	Dclk2	2:186116630-186245771	0	3.00579	-17.086	9.88564e-06	0.000587282
ENSRNOT00000092093	Trim46-206	ENSRNOG00000055433	Trim46	2:188557421-188561360	3.18097	0	12.9478	9.88624e-06	0.000587282
ENSRNOT00000015935	Klc1-201	ENSRNOG00000011572	Klc1	6:136330485-136362720	31.7976	4.42661	3.63851	9.93612e-06	0.000588555
ENSRNOT00000090921	Trim37-202	ENSRNOG00000006248	Trim37	10:74436208-74552273	0.532143	11.8075	-3.65934	9.95165e-06	0.000588555
ENSRNOT00000026263	Zfp61-202	ENSRNOG00000019416	Zfp61	1:81137511-81152384	0.834462	0	12.93	1.02405e-05	0.000600987
ENSRNOT00000029577	Cnn1-201	ENSRNOG00000027736	Cnn1	8:23113048-23121761	356.731	68.9944	3.17214	1.03565e-05	0.000607133
ENSRNOT00000079547	LOC103692165-202	ENSRNOG00000059679	LOC103692165	4:113970079-113984292	4.83744	0	15.4396	1.04085e-05	0.000609514
ENSRNOT00000049321	Pak1-201	ENSRNOG00000029784	Pak1	1:162768156-162882685	47.7189	8.44636	3.32685	1.06087e-05	0.000619879
ENSRNOT00000084446	Pid1-202	ENSRNOG00000029735	Pid1	9:91665986-91882927	35.678	7.98014	2.96429	1.06322e-05	0.000620573
ENSRNOT00000026925	Folr2-201	ENSRNOG00000019890	Folr2	1:166915045-166919302	0	5.44925	-13.0284	1.07088e-05	0.000622333
ENSRNOT00000074723	Tmem212-202	ENSRNOG00000012608	Tmem212	2:113598991-113616766	0	1.21401	-12.9211	1.07305e-05	0.000622914
ENSRNOT00000034075	AABR07032338.1-202	ENSRNOG00000024536	AABR07032338.1	18:61762103-61788859	0.513023	0	13.0627	1.09671e-05	0.000634584
ENSRNOT00000085765	Dysf-202	ENSRNOG00000032788	Dysf	4:115712850-115901868	13.8826	2.86719	3.08324	1.12201e-05	0.000647126
ENSRNOT00000082097	Cdv3-202	ENSRNOG00000010186	Cdv3	8:111839091-111850075	1.18249	0	13.0167	1.12361e-05	0.000647353
ENSRNOT00000054980	Tgfb1i1-201	ENSRNOG00000019965	Tgfb1i1	1:199664173-199670961	73.6154	8.95651	3.84679	1.12802e-05	0.000648538
ENSRNOT00000013184	Dync1i1-201	ENSRNOG00000009700	Dync1i1	4:30807879-31121090	1.88747	0.235907	3.8015	1.12809e-05	0.000648538
ENSRNOT00000056727	Plscr1-202	ENSRNOG00000008048	Plscr1	8:99625602-99645881	0.596233	0	12.8914	1.13126e-05	0.000649663
ENSRNOT00000086808	Asap2-201	ENSRNOG00000061519	Asap2	6:43234526-43343551	51.9466	11.5073	2.97623	1.13647e-05	0.000651953
ENSRNOT00000084777	Agap3-202	ENSRNOG00000012764	Agap3	4:7203003-7252950	4.30869	0.144188	5.70046	1.18534e-05	0.000678533
ENSRNOT00000033811	Luzp2-201	ENSRNOG00000021507	Luzp2	1:111849998-113527735	0.640737	9.46097	-3.10131	1.19116e-05	0.000681135
ENSRNOT00000049895	Os9-201	ENSRNOG00000025570	Os9	7:70380311-70407177	45.3941	7.50827	3.3956	1.20991e-05	0.000690093
ENSRNOT00000059639	Aldh1l2-201	ENSRNOG00000008586	Aldh1l2	7:26375866-26425108	9.46437	1.07956	3.93213	1.21069e-05	0.000690093
ENSRNOT00000047105	Ppp1r13l-201	ENSRNOG00000025350	Ppp1r13l	1:80279706-80290408	20.1628	1.46096	4.59755	1.21336e-05	0.00069088
ENSRNOT00000039780	Ntsr1-201	ENSRNOG00000028708	Ntsr1	3:175885894-176046345	0	0.136236	-12.956	1.22854e-05	0.000697295
ENSRNOT00000018562	Capg-201	ENSRNOG00000013668	Capg	4:100407658-100419446	130.233	23.871	3.25976	1.24149e-05	0.000703155
ENSRNOT00000086611	Kcnh3-201	ENSRNOG00000057315	Kcnh3	7:140788987-140910422	0	0.178976	-12.9416	1.25452e-05	0.000708287
ENSRNOT00000059318	Mia2-202	ENSRNOG00000005101	Mia2	6:80220547-80286546	0.979917	0	15.3568	1.2589e-05	0.00071001
ENSRNOT00000088025	Mtfr2-204	ENSRNOG00000058050	Mtfr2	1:15782477-15860624	0	2.51704	-16.1047	1.30608e-05	0.000730464
ENSRNOT00000014964	Plac9-201	ENSRNOG00000011263	Plac9	16:3851270-3866008	16.0508	1.01457	4.77578	1.31506e-05	0.000733953
ENSRNOT00000088006	Sbno1-202	ENSRNOG00000001064	Sbno1	12:37603986-37647773	0.281665	0	12.9241	1.35686e-05	0.00075649
ENSRNOT00000017339	Msr1-201	ENSRNOG00000012779	Msr1	16:56813791-56900052	0	0.264129	-12.9996	1.37015e-05	0.000763109
ENSRNOT00000001135	Aif1-201	ENSRNOG00000000853	Aif1	20:5161356-5163247	0	10.5957	-12.8149	1.37746e-05	0.000765482
ENSRNOT00000066328	Rps11-201	ENSRNOG00000020595	Rps11	1:101116635-101118825	450.29	71.6082	3.45643	1.37853e-05	0.000765482
ENSRNOT00000072400	Traf1-201	ENSRNOG00000048914	Traf1	3:14003340-14019204	0	1.32631	-12.8949	1.38292e-05	0.000766168
ENSRNOT00000057585	Fn1-202	ENSRNOG00000014288	Fn1	9:78900103-78969078	71.754	15.9404	2.97699	1.38321e-05	0.000766168
ENSRNOT00000079682	Zfp521-202	ENSRNOG00000016874	Zfp521	18:5046826-5314585	2.06764	0.182978	4.309	1.38579e-05	0.000766168
ENSRNOT00000010491	Sept3-201	ENSRNOG00000007686	2021-09-03	7:123510804-123526542	0.106204	10.8204	-5.88711	1.3871e-05	0.000766168
ENSRNOT00000082181	Ank3-203	ENSRNOG00000053288	Ank3	20:20105047-20471259	0.0224303	1.00439	-4.69107	1.39853e-05	0.000770891
ENSRNOT00000077325	Setdb1-202	ENSRNOG00000021143	Setdb1	2:196496189-196526886	0.839866	0	14.0046	1.41914e-05	0.000779041
ENSRNOT00000032359	Trim67-201	ENSRNOG00000019024	Trim67	19:57556694-57592722	0.0157143	6.00221	-7.78111	1.42139e-05	0.000779476
ENSRNOT00000012209	Tnks1bp1-201	ENSRNOG00000009195	Tnks1bp1	3:72460889-72483217	46.8012	7.86168	3.37862	1.44205e-05	0.000788385
ENSRNOT00000016933	Rab23-201	ENSRNOG00000012629	Rab23	9:38471716-38495126	0.507187	0	12.8751	1.44715e-05	0.000790365
ENSRNOT00000065093	Cnn2-201	ENSRNOG00000043044	Cnn2	7:12782491-12787750	510.91	108.019	3.05062	1.44887e-05	0.000790415
ENSRNOT00000090914	Ntrk2-203	ENSRNOG00000018839	Ntrk2	17:6114598-6244627	11.1284	143.235	-2.88116	1.45422e-05	0.000791801
ENSRNOT00000043854	Slco3a1-201	ENSRNOG00000032798	Slco3a1	1:135799801-136073483	2.38296	0.026269	7.30607	1.46165e-05	0.000793483
ENSRNOT00000007957	Grin3a-201	ENSRNOG00000005723	Grin3a	5:64928620-65073012	0.543995	10.8518	-3.50781	1.49979e-05	0.000812482
ENSRNOT00000084815	Fbln5-202	ENSRNOG00000050539	Fbln5	6:125645601-125723732	120.478	28.3658	2.89563	1.51259e-05	0.000817759
ENSRNOT00000014158	Elmsan1-201	ENSRNOG00000010653	Elmsan1	6:107636856-107678156	0.269998	0	12.7807	1.52518e-05	0.000822371
ENSRNOT00000066798	Synj2-201	ENSRNOG00000017114	Synj2	1:46835971-46932053	0.00602067	2.69491	-8.06173	1.52717e-05	0.000822371
TCONS_00192339	TCONS_00192339	XLOC_151431	XLOC_151431	2:81207819-81241090	0	0.685996	-13.0017	1.56627e-05	0.000839995
ENSRNOT00000024711	Park7-201	ENSRNOG00000018289	Park7	5:167988385-168004724	162.044	33.8444	3.06439	1.5692e-05	0.000840183
ENSRNOT00000061011	Iws1-201	ENSRNOG00000014630	Iws1	18:24849545-24880317	0.059983	5.63106	-5.76364	1.57447e-05	0.000840183
ENSRNOT00000018634	Fyb1-201	ENSRNOG00000013886	Fyb1	2:55835151-55983804	0	0.175136	-13.1963	1.57991e-05	0.000841639
ENSRNOT00000007738	Pde4b-201	ENSRNOG00000005905	Pde4b	5:122100099-122136769	0.0484993	4.75306	-5.79744	1.64129e-05	0.000868911
ENSRNOT00000008356	Calu-201	ENSRNOG00000006197	Calu	4:56625561-56653105	281.653	64.9667	2.92015	1.64451e-05	0.000869755
ENSRNOT00000072429	Hk1-201	ENSRNOG00000046891	Hk1	20:31912262-31956649	92.4191	20.4441	2.9884	1.66559e-05	0.000879163
ENSRNOT00000085677	Krt26-202	ENSRNOG00000033617	Krt26	10:87238723-87248632	0	2.01471	-12.8093	1.67669e-05	0.000884155
ENSRNOT00000050372	Nova1-201	ENSRNOG00000031440	Nova1	6:66965377-67084234	0.0304067	2.6332	-5.63216	1.67923e-05	0.00088454
ENSRNOT00000071884	Dpy19l2-201	ENSRNOG00000045585	Dpy19l2	8:25710472-25829569	0	0.174535	-12.875	1.68073e-05	0.00088454
ENSRNOT00000048864	AABR07071287.1-201	ENSRNOG00000031523	AABR07071287.1	8:107699480-107717313	0	1.08751	-12.7627	1.72128e-05	0.000903216
ENSRNOT00000022846	Tmsb10-201	ENSRNOG00000042499	Tmsb10	4:100882216-100883275	175.416	4.37328	6.13079	1.72983e-05	0.000906812
ENSRNOT00000065871	Map7d1-201	ENSRNOG00000010237	Map7d1	5:144250419-144274981	60.5136	11.7541	3.16849	1.79511e-05	0.000937365
ENSRNOT00000000383	Nid2-201	ENSRNOG00000000341	Nid2	15:4894213-4951917	173.795	42.4123	2.83976	1.80299e-05	0.000940558
ENSRNOT00000089292	Col1a2-202	ENSRNOG00000011292	Col1a2	4:31534225-31568806	584.552	58.2542	4.13479	1.82683e-05	0.000949386
ENSRNOT00000010645	Rab3b-201	ENSRNOG00000008001	Rab3b	5:128501847-128568188	0.66822	15.625	-3.72777	1.83117e-05	0.000950627
ENSRNOT00000047674	Ltbp1-201	ENSRNOG00000033090	Ltbp1	6:21203502-21600451	13.466	3.16675	2.89865	1.8778e-05	0.000970131
ENSRNOT00000013036	Kirrel3-201	ENSRNOG00000009772	Kirrel3	8:36125999-36254753	6.54178	1.03386	3.4602	1.88575e-05	0.000973298
ENSRNOT00000076996	Adgrv1-204	ENSRNOG00000016306	Adgrv1	2:8926850-9504134	0.721904	10.1181	-3.00661	1.89737e-05	0.000977562
ENSRNOT00000072297	Fgf18-201	ENSRNOG00000048389	Fgf18	10:18047109-18063391	0.694855	0	12.7719	1.89766e-05	0.000977562
ENSRNOT00000085727	Myo1e-201	ENSRNOG00000061928	Myo1e	8:76754492-76839593	41.4452	9.33757	2.9546	1.90291e-05	0.000979324
ENSRNOT00000036871	Uqcc2-201	ENSRNOG00000025909	Uqcc2	20:5712203-5723902	41.6136	5.16728	3.81161	1.91187e-05	0.00098299
ENSRNOT00000048535	LOC100364500-201	ENSRNOG00000048951	LOC100364500	20:2704376-2707120	4.38791	0	12.9177	1.93133e-05	0.00099014
ENSRNOT00000025705	Fam89a-201	ENSRNOG00000019022	Fam89a	19:57502308-57514896	0.421935	23.4484	-4.97797	1.94553e-05	0.000996467
ENSRNOT00000044325	Grm1-202	ENSRNOG00000014290	Grm1	1:4753144-5165859	0	0.044359	-12.6851	1.97346e-05	0.00100884
ENSRNOT00000077606	Aqp4-203	ENSRNOG00000016043	Aqp4	18:6766009-6781841	3.82746	78.4744	-3.5583	2.00399e-05	0.00102347
ENSRNOT00000048543	Sez6-201	ENSRNOG00000009350	Sez6	10:64865805-64915148	2.06148	35.9853	-3.31768	2.01361e-05	0.0010274
ENSRNOT00000024897	Vwa1-201	ENSRNOG00000018338	Vwa1	5:173216741-173222440	40.5279	3.60649	4.30093	2.02222e-05	0.00103081
ENSRNOT00000086775	Ptpn14-202	ENSRNOG00000003407	Ptpn14	13:108696384-108841511	26.145	3.37649	3.73744	2.02414e-05	0.00103081
ENSRNOT00000051139	Enpp2-202	ENSRNOG00000004089	Enpp2	7:94480396-94563001	0.313693	8.26393	-3.9105	2.02709e-05	0.00103133
ENSRNOT00000092314	Sgsm2-203	ENSRNOG00000027194	Sgsm2	10:61704744-61745086	2.91519	0.0311407	7.29807	2.03236e-05	0.00103303
ENSRNOT00000016104	Acsbg1-201	ENSRNOG00000011381	Acsbg1	8:59184113-59239954	8.63404	115.146	-2.93315	2.04599e-05	0.00103897
ENSRNOT00000010601	Ckap4-201	ENSRNOG00000008016	Ckap4	7:24939498-24947595	179.743	35.4435	3.14669	2.08599e-05	0.00105628
ENSRNOT00000078336	Eml2-202	ENSRNOG00000030127	Eml2	1:80092403-80119012	15.552	1.89449	3.84296	2.12908e-05	0.00107396
ENSRNOT00000076995	Sept4-210	ENSRNOG00000007367	2021-09-04	10:74871523-74884194	11.3555	0.578086	5.10508	2.12998e-05	0.00107396
ENSRNOT00000022583	Cep164-201	ENSRNOG00000029826	Cep164	8:50070579-50126413	1.51359	0.000199667	13.316	2.13805e-05	0.00107617
ENSRNOT00000017536	Plxna4-201	ENSRNOG00000013072	Plxna4	4:59445767-59809321	11.2741	2.55583	2.95067	2.13936e-05	0.00107617
ENSRNOT00000082792	Ltbp2-203	ENSRNOG00000012094	Ltbp2	6:108500112-108596569	24.103	4.53596	3.22127	2.16504e-05	0.00108705
ENSRNOT00000048848	Rbms2-201	ENSRNOG00000003076	Rbms2	7:2554308-2588686	51.8374	7.00033	3.6847	2.16758e-05	0.00108731
ENSRNOT00000092024	Cacna1g-202	ENSRNOG00000060528	Cacna1g	10:82129541-82197520	0	0.398181	-13.2485	2.17829e-05	0.00109165
ENSRNOT00000031227	Nrxn2-202	ENSRNOG00000021103	Nrxn2	1:221801524-221908049	0.024935	3.32995	-6.2192	2.18487e-05	0.00109393
ENSRNOT00000067649	Col14a1-201	ENSRNOG00000026415	Col14a1	7:95074236-95273298	128.91	31.9885	2.8131	2.19424e-05	0.00109759
ENSRNOT00000085461	Tmem268-202	ENSRNOG00000008712	Tmem268	5:79382096-79405240	0.441558	0	12.646	2.23021e-05	0.0011135
ENSRNOT00000007402	Wbp11l1-201	ENSRNOG00000005505	Wbp11l1	4:170154263-170167633	4.17428	0	15.0791	2.23908e-05	0.00111689
ENSRNOT00000003158	Hnrnpd-201	ENSRNOG00000002292	Hnrnpd	14:11256268-11274578	5.76421	0.247745	5.34513	2.24613e-05	0.00111841
ENSRNOT00000027752	Nucb2-201	ENSRNOG00000020456	Nucb2	1:185104656-185143272	14.9653	2.0937	3.64155	2.25489e-05	0.00112164
ENSRNOT00000086792	Tbc1d31-202	ENSRNOG00000006103	Tbc1d31	7:97760134-97839663	0	1.83299	-15.6501	2.2618e-05	0.00112403
ENSRNOT00000007351	Snrpf-201	ENSRNOG00000005556	Snrpf	7:34478331-34485034	1.52247	0	12.6497	2.29595e-05	0.00113995
ENSRNOT00000064115	Pxn-202	ENSRNOG00000001149	Pxn	12:46797954-46845080	62.0554	11.6993	3.22743	2.32061e-05	0.00115005
ENSRNOT00000073003	Knop1-201	ENSRNOG00000046147	Knop1	1:188556352-188572141	0.635846	0	12.6204	2.33035e-05	0.00115381
ENSRNOT00000024464	Clic4-201	ENSRNOG00000018109	Clic4	5:153568745-153625869	309.478	77.5757	2.7992	2.37435e-05	0.00117235
ENSRNOT00000044638	Slc4a10-202	ENSRNOG00000005307	Slc4a10	3:48096954-48286058	0	0.506989	-15.0909	2.394e-05	0.00117992
ENSRNOT00000003928	Cacna1e-202	ENSRNOG00000002863	Cacna1e	13:71907171-72367980	0.0144143	0.712303	-4.80916	2.39409e-05	0.00117992
ENSRNOT00000065386	Tiam2-201	ENSRNOG00000016728	Tiam2	1:44311513-44433193	21.8547	4.89175	2.96414	2.42511e-05	0.00119411
ENSRNOT00000047854	Agrn-202	ENSRNOG00000020205	Agrn	5:173589914-173611202	41.8233	2.42023	4.93264	2.45017e-05	0.00120534
ENSRNOT00000089042	Ubap2l-202	ENSRNOG00000017990	Ubap2l	2:189334780-189395746	19.4578	2.68378	3.65693	2.45512e-05	0.00120666
ENSRNOT00000091150	Lrrc56-202	ENSRNOG00000016697	Lrrc56	1:214183724-214197065	0.746114	0	12.6264	2.48186e-05	0.00121868
ENSRNOT00000014180	Car3-201	ENSRNOG00000010079	Car3	2:88126667-88135410	50.4245	6.40222	3.78633	2.48467e-05	0.00121895
ENSRNOT00000079545	Cd300a-201	ENSRNOG00000057058	Cd300a	10:103441549-103450947	0	1.81633	-12.5877	2.49259e-05	0.00122135
ENSRNOT00000092971	Gpm6a-203	ENSRNOG00000010731	Gpm6a	16:39367692-39719187	2.73477	47.4122	-3.32515	2.49686e-05	0.00122157
ENSRNOT00000050649	Megf11-202	ENSRNOG00000010634	Megf11	8:69971778-70184742	0.0984873	3.11844	-4.20496	2.51193e-05	0.00122782
ENSRNOT00000009914	Evc2-201	ENSRNOG00000007025	Evc2	14:78129749-78211931	7.40115	1.10567	3.54269	2.52806e-05	0.00123232
ENSRNOT00000076874	Urgcp-204	ENSRNOG00000012184	Urgcp	14:85957729-85982794	4.726	0.104388	6.29311	2.56596e-05	0.00124966
ENSRNOT00000061187	Spock1-201	ENSRNOG00000012747	Spock1	17:7675531-7797863	0.0308217	1.91596	-5.13721	2.57066e-05	0.00125081
ENSRNOT00000057802	Relb-203	ENSRNOG00000033235	Relb	1:80517411-80544825	0	3.49486	-15.053	2.57928e-05	0.00125387
ENSRNOT00000047011	Stk10-201	ENSRNOG00000004217	Stk10	10:17421075-17519706	7.57867	1.1075	3.57218	2.60568e-05	0.00126441
ENSRNOT00000018837	Wwp2-201	ENSRNOG00000012937	Wwp2	19:39543242-39614625	19.7713	3.74598	3.21293	2.60944e-05	0.00126508
ENSRNOT00000005583	Dnah9-201	ENSRNOG00000004171	Dnah9	10:52351192-52710862	0.0399903	1.19588	-4.09309	2.61541e-05	0.00126653
ENSRNOT00000016506	Sema5a-201	ENSRNOG00000011977	Sema5a	2:85377318-85808970	0.60115	8.38284	-2.99858	2.61716e-05	0.00126653
ENSRNOT00000003977	Abcc3-201	ENSRNOG00000002948	Abcc3	10:82047863-82116621	0.065022	3.44063	-4.9168	2.66056e-05	0.00128637
ENSRNOT00000036990	RGD1305645-201	ENSRNOG00000023576	RGD1305645	9:50526811-50548046	86.8406	18.0686	3.06707	2.6744e-05	0.00129189
ENSRNOT00000014904	LOC100360057-201	ENSRNOG00000011104	LOC100360057	5:169506138-169512871	138.796	24.2271	3.32109	2.68054e-05	0.00129253
ENSRNOT00000012875	Slc6a6-201	ENSRNOG00000009019	Slc6a6	4:123642210-123713319	63.7235	15.3459	2.85911	2.71975e-05	0.0013079
ENSRNOT00000025660	Tjap1-201	ENSRNOG00000018980	Tjap1	9:17086475-17110770	12.0108	1.17306	4.16346	2.75084e-05	0.00132166
ENSRNOT00000066702	Prpf39-201	ENSRNOG00000004521	Prpf39	6:86785771-86810316	0.393593	0	12.5582	2.77336e-05	0.00133009
ENSRNOT00000084563	Tnc-201	ENSRNOG00000058645	Tnc	5:79789671-79874671	409.089	105.833	2.75562	2.79146e-05	0.00133627
ENSRNOT00000055742	Kif21a-205	ENSRNOG00000014844	Kif21a	7:132116609-132143470	1.90149	0	14.961	2.7933e-05	0.00133627
ENSRNOT00000079511	LOC103692165-201	ENSRNOG00000059679	LOC103692165	4:113968995-113984632	3.12236	0	14.9468	2.81513e-05	0.00134411
ENSRNOT00000090923	Lims2-202	ENSRNOG00000016021	Lims2	18:24717336-24745747	14.6828	1.85936	3.78946	2.83145e-05	0.00134949
ENSRNOT00000059541	Cox17-201	ENSRNOG00000038951	Cox17	11:64962666-64968437	10.2743	0.244449	6.17969	2.92393e-05	0.00138687
ENSRNOT00000039354	Nf1x-201	ENSRNOG00000002983	Nf1x	19:25821949-25914696	33.4717	5.5552	3.39994	2.92544e-05	0.00138687
ENSRNOT00000085315	Errfi1-201	ENSRNOG00000058186	Errfi1	5:167952728-167966009	64.4108	11.119	3.33764	2.92834e-05	0.00138702
ENSRNOT00000090751	Akap9-202	ENSRNOG00000026319	Akap9	4:27195650-27331508	3.47813	0.369626	4.02427	2.94434e-05	0.00139337
ENSRNOT00000022897	Rps27-201	ENSRNOG00000016961	Rps27	2:189572176-189573280	298.71	33.636	3.95308	2.96386e-05	0.00140137
ENSRNOT00000027132	Myh14-201	ENSRNOG00000020014	Myh14	1:100608975-100671074	15.598	0.0409843	9.38065	2.96699e-05	0.00140161
ENSRNOT00000007398	Myh9-201	ENSRNOG00000004860	Myh9	7:118741110-118792625	189.415	0.222763	10.5702	3.02643e-05	0.00142744
ENSRNOT00000087368	Fam78b-201	ENSRNOG00000051941	Fam78b	13:85110098-85231155	5.74944	0.797931	3.64846	3.04516e-05	0.00143474
ENSRNOT00000023651	Cltb-201	ENSRNOG00000017506	Cltb	17:10537365-10554989	80.7643	16.7412	3.07723	3.0664e-05	0.00144348
ENSRNOT00000010586	Cgref1-201	ENSRNOG00000007923	Cgref1	6:26797126-26809129	29.9304	3.52636	3.88408	3.06969e-05	0.00144375
ENSRNOT00000001084	Ppp1r18-201	ENSRNOG00000000816	Ppp1r18	20:3372413-3397039	17.5083	2.2836	3.74362	3.09567e-05	0.0014547
ENSRNOT00000077083	Wasf2-202	ENSRNOG00000009805	Wasf2	5:151362019-151381238	2.56285	0	14.8936	3.11208e-05	0.00145984
ENSRNOT00000042717	Panx3-201	ENSRNOG00000031675	Panx3	8:40126342-40137390	0.838059	0	12.5113	3.13322e-05	0.00146719
ENSRNOT00000021871	Fubp3-201	ENSRNOG00000009139	Fubp3	3:10221395-10269693	11.5941	1.76235	3.52757	3.18249e-05	0.00148636
ENSRNOT00000010521	Reln-201	ENSRNOG00000021441	Reln	4:9347528-9773670	0.346671	5.28049	-3.12287	3.186e-05	0.0014867
ENSRNOT00000047450	Eef2-201	ENSRNOG00000020266	Eef2	7:11401501-11406771	1461.5	370.503	2.79012	3.20391e-05	0.00149375
ENSRNOT00000084651	P3h1-201	ENSRNOG00000053991	P3h1	5:138279506-138294262	94.4827	19.7104	3.06659	3.23797e-05	0.00150439
ENSRNOT00000012219	Rab6b-201	ENSRNOG00000009198	Rab6b	8:111627856-111668808	0.181451	7.38909	-4.54997	3.24167e-05	0.00150481
ENSRNOT00000028653	Scn1b-201	ENSRNOG00000021102	Scn1b	1:89550739-89560719	0	1.63659	-12.5292	3.26536e-05	0.001512
ENSRNOT00000028086	Tead2-201	ENSRNOG00000020695	Tead2	1:101214593-101230477	0.030197	10.796	-7.63848	3.26566e-05	0.001512
ENSRNOT00000049574	Ms4a6e-202	ENSRNOG00000030689	Ms4a6e	1:227757497-227769322	0	1.35945	-12.5011	3.29414e-05	0.00152388
ENSRNOT00000003466	Serpinb7-201	ENSRNOG00000002555	Serpinb7	13:27312498-27354052	0.236792	0	12.5823	3.29797e-05	0.00152433
ENSRNOT00000067456	Vcan-203	ENSRNOG00000029212	Vcan	2:18490102-18565842	0.614385	15.8049	-3.85729	3.30999e-05	0.00152725
ENSRNOT00000021876	Cnnm1-201	ENSRNOG00000016302	Cnnm1	1:263186235-263242468	0.852859	17.3126	-3.53551	3.38871e-05	0.00155954
ENSRNOT00000026112	Psd2-201	ENSRNOG00000019177	Psd2	18:28781349-28832428	0.595687	13.6613	-3.71437	3.41548e-05	0.00157051
TCONS_00192354	TCONS_00192354	XLOC_151434	XLOC_151434	2:81316605-81336399	0	1.1995	-13.0421	3.46487e-05	0.0015864
ENSRNOT00000083682	Adh1-202	ENSRNOG00000012436	Adh1	2:243550639-243561757	0	1.6178	-12.6684	3.50986e-05	0.00160426
ENSRNOT00000036025	Celsr1-201	ENSRNOG00000021285	Celsr1	7:126775516-126913585	1.57145	22.1946	-3.00896	3.52221e-05	0.00160853
ENSRNOT00000008964	Snf8-201	ENSRNOG00000006500	Snf8	10:83856280-83868598	52.0489	8.37943	3.43741	3.53592e-05	0.00161341
ENSRNOT00000081570	Rgs12-203	ENSRNOG00000030568	Rgs12	14:80982162-81023682	2.83411	0.14783	5.05057	3.59777e-05	0.00163884
ENSRNOT00000022980	Simc1-201	ENSRNOG00000016932	Simc1	17:10599223-10622063	0.443266	0	12.6048	3.60144e-05	0.00163911
ENSRNOT00000007233	Dnah11-201	ENSRNOG00000005451	Dnah11	6:145785275-146099053	0.019424	0.864083	-4.69017	3.66878e-05	0.00166693
ENSRNOT00000057798	Specc1-201	ENSRNOG00000002903	Specc1	10:48240330-48444334	0.21749	0	14.8139	3.71206e-05	0.00168415
ENSRNOT00000025067	Hspa5-201	ENSRNOG00000018294	Hspa5	3:13838304-13842762	285.008	57.9442	3.10332	3.80506e-05	0.00172154
ENSRNOT00000032937	Ms4a6e-201	ENSRNOG00000030689	Ms4a6e	1:227757425-227818305	0	0.403283	-13.1006	3.8695e-05	0.00174333
ENSRNOT00000010827	Slc24a2-201	ENSRNOG00000008169	Slc24a2	5:105336262-105579959	0.00352567	3.04193	-8.92264	3.90841e-05	0.00175938
ENSRNOT00000066253	Kmt5a-201	ENSRNOG00000001062	Kmt5a	12:37559770-37574750	7.70441	0.06984	7.56257	3.9274e-05	0.00176495
ENSRNOT00000004941	Lrrc59-201	ENSRNOG00000003524	Lrrc59	10:82352390-82367047	110.764	24.176	3.0036	3.98706e-05	0.00178577
ENSRNOT00000064588	Golim4-202	ENSRNOG00000024213	Golim4	2:174322673-174413236	7.79834	1.23728	3.4587	4.03127e-05	0.00180255
ENSRNOT00000042281	Ncam1-201	ENSRNOG00000031890	Ncam1	8:53839685-53901358	31.1093	4.25286	3.69559	4.08378e-05	0.00182197
ENSRNOT00000089876	Fbxl3-201	ENSRNOG00000059334	Fbxl3	15:93647503-93667395	3.271	0.0209047	8.07948	4.08491e-05	0.00182197
ENSRNOT00000021546	Myof-201	ENSRNOG00000016117	Myof	1:256585410-256734719	0.344437	12.678	-4.41424	4.0926e-05	0.00182377
ENSRNOT00000045041	Tcof1-201	ENSRNOG00000026108	Tcof1	18:56082195-56115593	18.9461	3.10312	3.41488	4.12774e-05	0.00183496
ENSRNOT00000081980	Myadm-201	ENSRNOG00000053450	Myadm	1:64438472-64446818	125.839	24.5818	3.15905	4.14676e-05	0.00184036
ENSRNOT00000018899	Pdlim7-201	ENSRNOG00000013653	Pdlim7	17:9653561-9668712	96.107	17.747	3.23762	4.17193e-05	0.00184953
ENSRNOT00000071484	Shank2-201	ENSRNOG00000050206	Shank2	1:217151166-217592763	0.0245713	0.807869	-4.22679	4.17435e-05	0.00184953
ENSRNOT00000024736	Mrc1-201	ENSRNOG00000018251	Mrc1	17:81352700-81433743	0.00405933	1.50664	-7.70222	4.1941e-05	0.00185675
ENSRNOT00000023240	Zfp384-202	ENSRNOG00000017066	Zfp384	4:157523771-157552596	1.44298	0	14.7143	4.25385e-05	0.0018739
ENSRNOT00000092079	Cd99l2-202	ENSRNOG00000023841	Cd99l2	15:5306459-5311204	3.9366	0.00886633	9.27914	4.29964e-05	0.00189096
ENSRNOT00000075592	B3gat2-201	ENSRNOG00000046852	B3gat2	9:29984077-30068649	0.050461	3.24272	-5.17711	4.35049e-05	0.00190862
ENSRNOT00000082152	Syne3-202	ENSRNOG00000005287	Syne3	6:128657880-128727374	0.188552	0	13.0556	4.38308e-05	0.00192134
ENSRNOT00000093472	Gar1-202	ENSRNOG00000061146	Gar1	2:235252216-235257464	1.69363	0	12.4369	4.4196e-05	0.00193576
ENSRNOT00000007112	Rapgef5-201	ENSRNOG00000005271	Rapgef5	6:145546595-145625236	0.028982	1.98611	-5.29353	4.44078e-05	0.00194028
ENSRNOT00000056531	Cep63-202	ENSRNOG00000008410	Cep63	8:111064049-111116014	0.00110133	1.48371	-9.4158	4.45292e-05	0.00194399
ENSRNOT00000056612	Traf3ip1-201	ENSRNOG00000024468	Traf3ip1	9:98621506-98656843	1.14383	0	14.6733	4.50644e-05	0.00196256
ENSRNOT00000030470	Gphn-201	ENSRNOG00000028366	Gphn	6:101603319-101859164	1.27323	17.009	-2.94006	4.53706e-05	0.00197429
ENSRNOT00000019363	Tma16-201	ENSRNOG00000014188	Tma16	16:24978527-24994718	0.601748	0	12.6079	4.54415e-05	0.00197576
ENSRNOT00000043827	Ccser1-201	ENSRNOG00000029321	Ccser1	4:91373942-91972325	0.0475843	1.22374	-3.9093	4.55889e-05	0.00198056
ENSRNOT00000005490	Vasn-201	ENSRNOG00000004141	Vasn	10:11121041-11131548	69.9561	12.5086	3.2912	4.57761e-05	0.00198708
ENSRNOT00000025901	Prkcq-201	ENSRNOG00000019057	Prkcq	17:70971915-71105286	17.5082	4.17996	2.86973	4.66087e-05	0.00200894
ENSRNOT00000067161	Nostrin-201	ENSRNOG00000006611	Nostrin	3:55369214-55433843	0.132633	0	12.3872	4.66758e-05	0.00200984
ENSRNOT00000018038	Atp5if1-201	ENSRNOG00000013300	Atp5if1	5:150719569-150723321	42.8493	2.93892	4.66098	4.71581e-05	0.00202734
ENSRNOT00000075163	Car10-202	ENSRNOG00000002626	Car10	10:80790168-81296363	0	0.148844	-14.7382	4.76375e-05	0.00204631
ENSRNOT00000083580	Gal3st1-202	ENSRNOG00000042041	Gal3st1	14:84237520-84247369	0.837431	0	12.3514	4.77892e-05	0.00204997
ENSRNOT00000088893	AABR07057675.1-201	ENSRNOG00000054487	AABR07057675.1	7:83682272-83701447	0	0.793352	-12.4136	4.8447e-05	0.00207276
ENSRNOT00000015845	Pcsk6-201	ENSRNOG00000011526	Pcsk6	1:126749508-126947392	25.8329	6.81059	2.73008	4.85226e-05	0.00207434
ENSRNOT00000046798	Mdc1-201	ENSRNOG00000032813	Mdc1	20:3405018-3419831	2.64863	0	14.6327	4.87729e-05	0.00208172
ENSRNOT00000018697	Stmn3-201	ENSRNOG00000013657	Stmn3	3:176808121-176816162	0.175786	38.1944	-6.97997	4.91888e-05	0.00209446
ENSRNOT00000065416	Ptpn6-201	ENSRNOG00000014294	Ptpn6	4:157239142-157263890	0.335072	0	12.3688	5.04326e-05	0.002144
ENSRNOT00000007710	Cdk5rap2-201	ENSRNOG00000005788	Cdk5rap2	5:86387240-86554102	0.349341	6.53108	-3.436	5.0902e-05	0.00215882
ENSRNOT00000082445	Gabrg2-202	ENSRNOG00000003241	Gabrg2	10:27092827-27179900	0	0.161931	-12.3071	5.12907e-05	0.00217087
ENSRNOT00000086681	Plekha7-202	ENSRNOG00000024602	Plekha7	1:185356975-185538694	28.8515	7.69014	2.71198	5.13053e-05	0.00217087
ENSRNOT00000076012	Asb12-202	ENSRNOG00000004197	Asb12	X:64715214-64726210	0.725947	0	12.3001	5.13079e-05	0.00217087
ENSRNOT00000021168	Efhd1-201	ENSRNOG00000015596	Efhd1	9:94362299-94408885	0.132258	5.49149	-4.57447	5.25947e-05	0.0022218
ENSRNOT00000075188	Armc3-201	ENSRNOG00000016716	Armc3	17:85914410-86009396	0	0.15286	-12.3499	5.29605e-05	0.00223373
ENSRNOT00000091828	Macf1-204	ENSRNOG00000016047	Macf1	5:141040752-141229781	6.57007	0.000330667	14.7835	5.33517e-05	0.00224492
ENSRNOT00000027093	Arl3-201	ENSRNOG00000019973	Arl3	1:266287017-266333105	7.20398	0.746461	4.0727	5.3729e-05	0.00225371
ENSRNOT00000080846	Bicc1-202	ENSRNOG00000000614	Bicc1	20:18833481-18940408	12.3411	2.68655	3.00355	5.39934e-05	0.00226126
ENSRNOT00000063889	Glra1-201	ENSRNOG00000013588	Glra1	10:40855559-40953651	4.13044	0.596738	3.60087	5.60507e-05	0.00234009
ENSRNOT00000024677	Gas6-201	ENSRNOG00000018233	Gas6	16:81213364-81243757	172.169	46.3629	2.70207	5.67037e-05	0.00236367
ENSRNOT00000083536	Fap-202	ENSRNOG00000005679	Fap	3:48503525-48536235	0	0.449065	-12.3694	5.78839e-05	0.00240537
ENSRNOT00000057382	Ewsr1-201	ENSRNOG00000046950	Ewsr1	4:24612205-24640686	20.0304	3.3221	3.39187	5.85023e-05	0.0024273
ENSRNOT00000081033	Rab28-202	ENSRNOG00000017074	Rab28	14:73889337-73963202	0.400482	17.8148	-4.67027	5.89449e-05	0.00244002
ENSRNOT00000008282	Gpr37l1-201	ENSRNOG00000006237	Gpr37l1	13:51985684-51992693	18.8294	273.887	-3.05918	5.89457e-05	0.00244002
ENSRNOT00000084582	Gabbr1-206	ENSRNOG00000000774	Gabbr1	20:1956577-1980101	0.020729	5.68698	-7.27521	5.91743e-05	0.00244417
ENSRNOT00000013052	Creld1-201	ENSRNOG00000009414	Creld1	4:145440114-145449892	45.5672	6.941	3.52345	5.9183e-05	0.00244417
ENSRNOT00000075342	RT1-DMb-201	ENSRNOG00000049491	RT1-DMb	20:3945601-3952846	0	2.11853	-12.428	5.95651e-05	0.00245614
ENSRNOT00000015576	Akap2-201	ENSRNOG00000011504	Akap2	5:74941802-74982401	22.6486	2.80318	3.80482	5.96103e-05	0.00245614
ENSRNOT00000028875	Srp68-202	ENSRNOG00000009351	Srp68	10:105123327-105228547	6.7844	0	18.7964	6.03328e-05	0.00247828
ENSRNOT00000077889	Fam3c-201	ENSRNOG00000060349	Fam3c	4:49389501-49422824	5.04947	0.380165	4.55189	6.10277e-05	0.00250298
ENSRNOT00000048770	Slc6a9-201	ENSRNOG00000019484	Slc6a9	5:136669674-136703697	14.9669	2.31723	3.50201	6.13762e-05	0.00251534
ENSRNOT00000014924	Dlc1-201	ENSRNOG00000010780	Dlc1	16:59197367-59247754	25.3514	2.05325	4.43239	6.20783e-05	0.00254023
ENSRNOT00000046943	P4ha3-201	ENSRNOG00000017118	P4ha3	1:165295847-165330322	47.858	11.261	2.89189	6.26774e-05	0.00255373
ENSRNOT00000074131	Pnkd-203	ENSRNOG00000014806	Pnkd	9:81566074-81568532	0.0105663	25.7821	-9.85139	6.2688e-05	0.00255373
ENSRNOT00000090641	Slc6a15-202	ENSRNOG00000027468	Slc6a15	7:45328162-45382229	2.10482	31.9516	-3.12206	6.2864e-05	0.00255373
ENSRNOT00000087748	Itga5-201	ENSRNOG00000057451	Itga5	7:144970444-144993652	52.017	11.3159	3.01019	6.28676e-05	0.00255373
ENSRNOT00000076833	Znfx1-202	ENSRNOG00000008194	Znfx1	3:163787101-163847671	0.00279467	4.265	-9.62505	6.28855e-05	0.00255373
ENSRNOT00000019408	Zfhx3-201	ENSRNOG00000014452	Zfhx3	19:42758127-42920344	5.0698	0.857555	3.38124	6.30399e-05	0.00255806
ENSRNOT00000026962	Folr1-201	ENSRNOG00000019902	Folr1	1:166934462-166943592	0.548566	26.6999	-4.78742	6.3128e-05	0.00255818
ENSRNOT00000090816	Rock2-202	ENSRNOG00000004496	Rock2	6:42180894-42289908	31.6274	8.20017	2.75075	6.39317e-05	0.0025825
ENSRNOT00000084012	Agap2-202	ENSRNOG00000025584	Agap2	7:70364813-70372286	0.0230023	6.79143	-7.27979	6.43481e-05	0.0025915
ENSRNOT00000046802	Rap1gap-201	ENSRNOG00000013825	Rap1gap	5:156026911-156074395	0.517314	12.0824	-3.73674	6.46314e-05	0.00259531
ENSRNOT00000092867	Rps7-203	ENSRNOG00000008551	Rps7	6:47899525-47904437	81.346	6.79693	4.3883	6.48405e-05	0.00260154
ENSRNOT00000004091	Calr-201	ENSRNOG00000003029	Calr	19:25956771-25961666	1127.72	305.053	2.69176	6.52954e-05	0.00261783
ENSRNOT00000047271	Mapk4-201	ENSRNOG00000015401	Mapk4	18:69894684-69944632	0.334333	8.45483	-3.85253	6.5351e-05	0.0026181
ENSRNOT00000020194	Il18r1-201	ENSRNOG00000015027	Il18r1	9:47185443-47219175	0.22451	0	12.2132	6.55902e-05	0.00262375
ENSRNOT00000042459	Actb-201	ENSRNOG00000034254	Actb	12:13715843-13718812	10666	3028.84	2.62331	6.57432e-05	0.00262791
ENSRNOT00000006387	Cytip-201	ENSRNOG00000004772	Cytip	3:44150992-44177689	0	0.483309	-12.1858	6.60227e-05	0.00263326
ENSRNOT00000080907	Atp10a-201	ENSRNOG00000056228	Atp10a	1:115975324-116141892	8.33164	1.91588	2.92853	6.65021e-05	0.002649
ENSRNOT00000036721	B4galnt3-201	ENSRNOG00000010344	B4galnt3	4:152737161-152835182	1.41891	0.103348	4.5849	6.66081e-05	0.002649
ENSRNOT00000057880	LOC102553715-203	ENSRNOG00000045683	LOC102553715	10:49000973-49003931	363.603	76.7292	3.04777	6.66174e-05	0.002649
ENSRNOT00000013271	Foxp1-201	ENSRNOG00000009184	Foxp1	4:131366744-131694755	7.50258	1.85452	2.8158	6.77294e-05	0.00268723
TCONS_00198580	TCONS_00198580	XLOC_156879	XLOC_156879	2:182253269-182319003	0	1.24752	-14.8196	6.78117e-05	0.00268851
ENSRNOT00000061014	Runx2-201	ENSRNOG00000020193	Runx2	9:18564927-18773092	5.60045	1.18644	3.04326	6.80302e-05	0.00269318
ENSRNOT00000091807	Slco2b1-202	ENSRNOG00000017976	Slco2b1	1:164626083-164671577	0	0.309581	-12.3042	6.82231e-05	0.00269882
ENSRNOT00000021532	Trip13-201	ENSRNOG00000015810	Trip13	1:31967982-32012919	0.192665	0	12.4061	6.84634e-05	0.00270592
ENSRNOT00000078231	LOC102553715-202	ENSRNOG00000002382	LOC102553715	10:47765432-47767983	343.955	66.5171	3.18208	6.85035e-05	0.00270592
ENSRNOT00000044017	Atp8a1-201	ENSRNOG00000034200	Atp8a1	14:42015347-42206311	2.50625	29.3729	-2.7459	6.86062e-05	0.00270797
ENSRNOT00000085681	Spag9-202	ENSRNOG00000002749	Spag9	10:81693885-81827559	0.238808	9.74051	-4.55235	6.88251e-05	0.00271461
ENSRNOT00000045513	Grik3-201	ENSRNOG00000008992	Grik3	5:143500441-143715546	0.0144197	2.68214	-6.75483	6.97299e-05	0.00274423
ENSRNOT00000017592	Tram2-201	ENSRNOG00000013046	Tram2	9:27117869-27192135	22.8565	5.19558	2.94435	7.06897e-05	0.00277996
ENSRNOT00000000025	Hebp1-201	ENSRNOG00000000024	Hebp1	4:168903565-168933079	28.9267	5.63437	3.16097	7.14602e-05	0.00279849
ENSRNOT00000071913	Atp5f1e-201	ENSRNOG00000049912	Atp5f1e	3:172563105-172566010	217.05	39.4566	3.26727	7.14745e-05	0.00279849
ENSRNOT00000072077	AABR07006269.1-201	ENSRNOG00000047349	AABR07006269.1	1:227670159-227680128	0	1.27044	-12.153	7.15503e-05	0.00279941
ENSRNOT00000022962	Rlbp1-201	ENSRNOG00000016897	Rlbp1	1:141097695-141111400	0.220264	13.0064	-5.06077	7.19087e-05	0.00280967
ENSRNOT00000020219	Scg2-201	ENSRNOG00000015055	Scg2	9:85237458-85243001	0.198759	20.2849	-5.8322	7.19176e-05	0.00280967
ENSRNOT00000064251	Msrb3-201	ENSRNOG00000042668	Msrb3	7:62850515-62972084	20.6265	5.38719	2.74368	7.20096e-05	0.00281121
ENSRNOT00000047563	Col6a4-201	ENSRNOG00000031782	Col6a4	8:114670631-114766803	0	0.131527	-12.1579	7.32736e-05	0.00284809
ENSRNOT00000013009	Slitrk3-201	ENSRNOG00000009821	Slitrk3	2:170452702-170460754	0	1.55699	-12.1446	7.40623e-05	0.00287457
ENSRNOT00000091139	Piezo1-201	ENSRNOG00000056786	Piezo1	19:55305496-55367353	26.6706	6.33762	2.8826	7.45861e-05	0.00289071
ENSRNOT00000087230	Scml4-202	ENSRNOG00000026110	Scml4	20:47596575-47686862	0	0.700118	-14.4545	7.53363e-05	0.00291338
ENSRNOT00000088016	Xpnpep1-202	ENSRNOG00000012084	Xpnpep1	1:273708212-273758442	20.0207	3.96436	3.13901	7.53887e-05	0.00291338
ENSRNOT00000001458	Rnf216-201	ENSRNOG00000001101	Rnf216	12:13508429-13631689	3.00893	0.41527	3.64826	7.5562e-05	0.00291797
ENSRNOT00000005740	Ccdc59-201	ENSRNOG00000004183	Ccdc59	7:47928060-47934929	1.03259	0	12.1298	7.57832e-05	0.0029244
ENSRNOT00000022637	Zfp521-201	ENSRNOG00000016874	Zfp521	18:5032029-5314511	18.0077	4.98754	2.65587	7.73677e-05	0.00297055
ENSRNOT00000090402	Actn4-203	ENSRNOG00000020433	Actn4	1:87078847-87147333	1.80331	28.2675	-3.18066	7.77035e-05	0.00298131
ENSRNOT00000010939	Jph2-201	ENSRNOG00000008170	Jph2	3:159712325-159775643	22.0913	4.6752	3.05165	7.85401e-05	0.00300967
ENSRNOT00000027273	Cdh3-201	ENSRNOG00000020129	Cdh3	19:38669230-38719677	9.93689	1.67778	3.37605	7.85553e-05	0.00300967
ENSRNOT00000033980	Lrrtm3-201	ENSRNOG00000026466	Lrrtm3	20:25990304-26163656	0.0423337	1.74757	-4.53066	7.92329e-05	0.00303346
ENSRNOT00000082338	Gba3-202	ENSRNOG00000024634	Gba3	14:64390793-64535170	0.0483667	0	12.1071	7.95179e-05	0.0030422
ENSRNOT00000025394	Stab1-201	ENSRNOG00000018434	Stab1	16:7222067-7250924	0.00463533	1.495	-7.40105	7.97263e-05	0.00304582
ENSRNOT00000038395	Unc119b-201	ENSRNOG00000021725	Unc119b	12:47219089-47229564	140.27	33.428	2.87596	8.0284e-05	0.00306275
ENSRNOT00000033288	Cnpy4-201	ENSRNOG00000027175	Cnpy4	12:19328957-19335119	20.7161	1.51063	4.5828	8.04857e-05	0.00306826
ENSRNOT00000076585	P3h4-202	ENSRNOG00000015787	P3h4	10:88318817-88325326	9.75813	0.139697	6.90894	8.14566e-05	0.00310085
ENSRNOT00000032193	Sez6l-201	ENSRNOG00000025612	Sez6l	12:50090464-50241995	0.287695	5.42585	-3.42629	8.2268e-05	0.00312507
ENSRNOT00000080124	Smarca2-202	ENSRNOG00000011931	Smarca2	1:244615821-244781633	0.228235	4.81255	-3.59313	8.31471e-05	0.00315399
ENSRNOT00000003207	Rasgef1b-201	ENSRNOG00000002345	Rasgef1b	14:11988671-12027381	0.0744257	4.2729	-5.03338	8.3424e-05	0.00316225
ENSRNOT00000071708	Tmsb4x-201	ENSRNOG00000047931	Tmsb4x	X:28593405-28595395	6821.36	1915.66	2.63712	8.37011e-05	0.0031692
ENSRNOT00000032289	March1-201	ENSRNOG00000026310	2021-03-01	16:25001666-25192675	0	0.355601	-14.5776	8.43204e-05	0.0031872
ENSRNOT00000010701	Ehd4-201	ENSRNOG00000007584	Ehd4	3:111877853-111941841	14.8963	3.1342	3.05279	8.55673e-05	0.00322523
ENSRNOT00000073652	Bola2-201	ENSRNOG00000047988	Bola2	1:198120099-198121158	26.2649	0.320002	7.12287	8.85376e-05	0.00332081
ENSRNOT00000089266	Lonrf3-202	ENSRNOG00000013092	Lonrf3	X:122938009-122973321	0.545723	13.7228	-3.87283	8.86693e-05	0.00332342
ENSRNOT00000025327	Sec22b-201	ENSRNOG00000018673	Sec22b	2:200076054-200098076	63.0412	14.8144	2.89808	8.92925e-05	0.00333885
ENSRNOT00000021253	Chst9-201	ENSRNOG00000015867	Chst9	18:6834365-7081356	0.113283	2.4431	-3.63906	8.95156e-05	0.00334344
ENSRNOT00000047522	Trabd2b-201	ENSRNOG00000029141	Trabd2b	5:133221139-133420644	3.71126	0.534571	3.60822	9.0577e-05	0.00337836
ENSRNOT00000067374	Nedd9-201	ENSRNOG00000014548	Nedd9	17:23116661-23179701	78.8774	22.2381	2.63041	9.07079e-05	0.00338089
ENSRNOT00000028283	Cttn-207	ENSRNOG00000050994	Cttn	1:215255386-215290838	10.5737	0	17.908	9.1756e-05	0.0034152
ENSRNOT00000041910	Fmn1-203	ENSRNOG00000031760	Fmn1	3:104899682-105086436	0.163799	0	14.2719	9.28506e-05	0.00345354
ENSRNOT00000022761	Sap130-201	ENSRNOG00000016773	Sap130	18:24397369-24497832	7.14935	1.41907	3.14361	9.31071e-05	0.00346068
ENSRNOT00000009377	Dync1h1-201	ENSRNOG00000006178	Dync1h1	6:134958973-135022584	33.3655	5.31135	3.42392	9.36522e-05	0.00347611
ENSRNOT00000081802	Ptms-201	ENSRNOG00000060098	Ptms	4:157435373-157439507	532.571	140.85	2.72462	9.40585e-05	0.00347837
ENSRNOT00000014249	Slc4a5-201	ENSRNOG00000010378	Slc4a5	4:114918488-115002300	0.081384	0	12.0773	9.40657e-05	0.00347837
ENSRNOT00000034411	Ccdc149-201	ENSRNOG00000024454	Ccdc149	14:60857989-60952088	3.80669	0.579454	3.51872	9.41031e-05	0.00347837
ENSRNOT00000024083	Etfb-201	ENSRNOG00000017851	Etfb	1:98472745-98486976	25.7697	3.87497	3.53495	9.87674e-05	0.00363822
ENSRNOT00000017629	Mmp15-201	ENSRNOG00000012622	Mmp15	19:10079765-10101451	1.89692	35.9487	-3.43203	9.90008e-05	0.00363992
ENSRNOT00000004346	RGD1305733-201	ENSRNOG00000003198	RGD1305733	10:3411380-3570688	0.240044	4.57244	-3.44491	9.92535e-05	0.00364325
ENSRNOT00000088822	Trim46-204	ENSRNOG00000055433	Trim46	2:188549080-188553289	1.67817	0	12.1278	9.93124e-05	0.00364325
ENSRNOT00000016947	Eef1a2-201	ENSRNOG00000012477	Eef1a2	3:176657107-176666282	13.0965	0.957554	4.58682	9.98214e-05	0.00365941
ENSRNOT00000007358	Adamts8-201	ENSRNOG00000005574	Adamts8	8:32018560-32037531	12.3443	1.57854	3.77507	0.000100188	0.00367035
ENSRNOT00000058382	Nfatc1-201	ENSRNOG00000017146	Nfatc1	18:77203525-77322690	10.3497	2.44235	2.8915	0.000100839	0.00369166
ENSRNOT00000054949	Pycr1-201	ENSRNOG00000036682	Pycr1	10:109818177-109821807	29.7018	1.9998	4.69914	0.000101561	0.00371556
ENSRNOT00000081948	Oxr1-203	ENSRNOG00000056487	Oxr1	7:80351774-80788094	0.0373897	3.5462	-5.72897	0.000102739	0.00375607
ENSRNOT00000079006	Mtus1-203	ENSRNOG00000010748	Mtus1	16:54291251-54383643	8.55358	1.77406	3.08133	0.000104697	0.00381723
ENSRNOT00000027544	Gfra3-201	ENSRNOG00000020309	Gfra3	18:27491845-27520295	0.234934	0	12.0168	0.000104783	0.00381778
ENSRNOT00000078994	Kcnip3-202	ENSRNOG00000014152	Kcnip3	3:120023917-120087136	0.685945	13.2987	-3.47379	0.000105771	0.0038459
ENSRNOT00000056935	RGD1309730-201	ENSRNOG00000037567	RGD1309730	3:91086186-91195981	2.86505	0.014019	8.42077	0.000106327	0.00386323
ENSRNOT00000057562	Myocd-201	ENSRNOG00000003669	Myocd	10:51683540-51778986	2.44888	0.31251	3.7702	0.000106392	0.00386323
ENSRNOT00000060097	Crlf1-201	ENSRNOG00000020030	Crlf1	16:20675042-20686317	31.1883	4.68784	3.54006	0.000106567	0.00386697
ENSRNOT00000037700	Chst8-201	ENSRNOG00000022919	Chst8	1:90542096-90685257	0.0666587	2.10587	-4.15913	0.000107334	0.00388955
ENSRNOT00000065494	Colec12-201	ENSRNOG00000016366	Colec12	18:867048-1052606	0.246623	4.63482	-3.41413	0.000107677	0.00389933
ENSRNOT00000006128	Wars-201	ENSRNOG00000004359	Wars	6:132771021-132797675	0.00159167	1.03273	-8.29735	0.000107797	0.00390102
ENSRNOT00000050191	Lrrfip1-201	ENSRNOG00000019892	Lrrfip1	9:98190829-98257735	8.67816	1.60004	3.24426	0.000108366	0.00391423
ENSRNOT00000004836	Atp5pd-201	ENSRNOG00000003626	Atp5pd	10:103967312-103972668	99.1025	17.5366	3.30088	0.000108401	0.00391423
ENSRNOT00000065533	NEWGENE_1308624-201	ENSRNOG00000019031	NEWGENE_1308624	9:101284902-101290558	0	2.12257	-12.0776	0.000108454	0.00391423
ENSRNOT00000082385	Prrx1-202	ENSRNOG00000003720	Prrx1	13:81147352-81214546	31.3488	8.21058	2.73389	0.000108868	0.00392651
ENSRNOT00000019267	Igf1r-201	ENSRNOG00000014187	Igf1r	1:128924966-129206516	25.8656	7.66516	2.56247	0.000109657	0.00394337
ENSRNOT00000012156	Xkr7-201	ENSRNOG00000009180	Xkr7	3:148510779-148533404	0	0.496381	-11.9769	0.000109682	0.00394337
ENSRNOT00000077973	Kcnab1-201	ENSRNOG00000056697	Kcnab1	2:155718359-156009526	0.032228	1.08006	-4.25932	0.000109695	0.00394337
ENSRNOT00000083493	Phldb3-201	ENSRNOG00000055259	Phldb3	1:81474553-81492631	7.49723	0.632986	4.37336	0.000109704	0.00394337
ENSRNOT00000035240	S100a10-201	ENSRNOG00000023226	S100a10	2:193892589-193901236	396.862	108.05	2.6797	0.000110068	0.00395379
ENSRNOT00000082100	Nav3-201	ENSRNOG00000052157	Nav3	7:52165233-52404774	2.83388	0.559161	3.15097	0.000112868	0.00404345
ENSRNOT00000043752	Ggct-201	ENSRNOG00000034084	Ggct	4:85186644-85192834	0.99944	0	11.9286	0.000112872	0.00404345
ENSRNOT00000081014	Nars-203	ENSRNOG00000017852	Nars	18:59986360-60002529	0	3.30768	-14.2589	0.000112928	0.00404345
ENSRNOT00000019133	Krt19-201	ENSRNOG00000014233	Krt19	10:88055841-88060561	0.111901	14.7196	-6.22833	0.000113302	0.00405265
ENSRNOT00000048417	Tfg-201	ENSRNOG00000001633	Tfg	11:46184871-46206721	12.7551	1.21846	4.16633	0.00011335	0.00405265
ENSRNOT00000066850	Ucma-201	ENSRNOG00000017987	Ucma	17:77252100-77261731	8.93385	0.038549	8.65333	0.000113865	0.00406834
ENSRNOT00000022801	Tpm2-201	ENSRNOG00000016731	Tpm2	5:59017575-59025631	43.514	5.95997	3.66032	0.000114056	0.00407248
ENSRNOT00000091542	Aip-202	ENSRNOG00000022289	Aip	1:219362552-219374014	28.8494	1.99321	4.68348	0.000114352	0.00407758
ENSRNOT00000018935	Arhgef4-201	ENSRNOG00000014035	Arhgef4	9:41295909-41302501	0.631063	27.8882	-4.6706	0.000116857	0.00415307
ENSRNOT00000036050	Rmdn1-201	ENSRNOG00000025145	Rmdn1	5:33581028-33604564	1.18087	0	14.1341	0.000117193	0.00416225
ENSRNOT00000003556	Kctd3-201	ENSRNOG00000002627	Kctd3	13:107433588-107471843	10.8823	0.0509897	8.50187	0.000117777	0.00418023
ENSRNOT00000002793	Epha5-201	ENSRNOG00000002024	Epha5	14:25589767-25958227	0.633339	8.51295	-2.96131	0.000118199	0.00419242
ENSRNOT00000040802	Lrrn4-201	ENSRNOG00000032989	Lrrn4	3:125523781-125533600	3.60587	0.02677	7.8368	0.000119583	0.00423869
ENSRNOT00000044613	Hyou1-201	ENSRNOG00000010944	Hyou1	8:48699769-48711910	141.224	36.6007	2.7562	0.00012305	0.00434611
ENSRNOT00000023537	Zyx-201	ENSRNOG00000017354	Zyx	4:71740532-71749386	85.7205	18.0527	3.05763	0.0001231	0.00434611
ENSRNOT00000010463	Mcam-201	ENSRNOG00000007726	Mcam	8:48472824-48481001	57.9772	10.3929	3.28325	0.000125184	0.00441096
ENSRNOT00000090137	Lamc3-201	ENSRNOG00000059507	Lamc3	3:9267122-9326993	0.015706	1.5759	-5.83703	0.000125423	0.00441374
ENSRNOT00000092158	Ccdc9b-202	ENSRNOG00000028910	Ccdc9b	3:110551233-110556808	4.57707	0.027347	8.14321	0.000125428	0.00441374
ENSRNOT00000022056	Il33-201	ENSRNOG00000016456	Il33	1:248132090-248147029	20.0228	2.95771	3.55785	0.000126415	0.00444263
ENSRNOT00000044738	Arnt-201	ENSRNOG00000031174	Arnt	2:196594303-196651179	3.1845	0.292632	4.27705	0.000126597	0.00444608
ENSRNOT00000002906	Atg3-201	ENSRNOG00000002094	Atg3	11:60585185-60613718	14.1315	2.30593	3.42058	0.000126782	0.00444937
ENSRNOT00000046744	Kif21a-204	ENSRNOG00000014844	Kif21a	7:132071116-132143470	0	1.2778	-15.0629	0.000127303	0.00445756
ENSRNOT00000006911	Ccdc157-201	ENSRNOG00000005147	Ccdc157	14:84376591-84393421	0.358172	0	11.8905	0.00012734	0.00445756
ENSRNOT00000091355	Oxr1-205	ENSRNOG00000056487	Oxr1	7:80713321-80786340	0.082897	0	11.9152	0.000127423	0.00445756
ENSRNOT00000021539	Tmem169-201	ENSRNOG00000016091	Tmem169	9:79630604-79654593	0	0.505824	-12.0999	0.000128087	0.00447495
ENSRNOT00000087023	Tgfb2-202	ENSRNOG00000002418	Tgfb2	13:105042274-105140473	7.51427	1.55353	3.07525	0.000128472	0.00448544
ENSRNOT00000028390	Nucb1-201	ENSRNOG00000020889	Nucb1	1:101480145-101500850	159.798	45.8061	2.60702	0.000130896	0.00456118
ENSRNOT00000071426	Pcbd2-201	ENSRNOG00000047796	Pcbd2	17:8929810-8980571	30.0489	7.00415	2.9003	0.000131374	0.00456889
ENSRNOT00000054858	AABR07006049.2-201	ENSRNOG00000048049	AABR07006049.2	1:215298161-215310013	2.25868	0	14.0766	0.000131519	0.00457096
ENSRNOT00000073460	Adat2-201	ENSRNOG00000046983	Adat2	1:7726529-7742484	0.435807	0	12.095	0.000131839	0.00457748
ENSRNOT00000044956	Cdv3-201	ENSRNOG00000010186	Cdv3	8:111840027-111850393	16.8754	0.0765037	8.53953	0.000132263	0.00458499
ENSRNOT00000048474	Tmem132c-201	ENSRNOG00000000963	Tmem132c	12:32808022-33016885	0.0514633	1.74617	-4.27499	0.000132265	0.00458499
ENSRNOT00000073148	Gria1-202	ENSRNOG00000045816	Gria1	10:42614713-42760129	0.018562	3.22009	-6.64062	0.000132408	0.00458698
ENSRNOT00000091206	Park7-203	ENSRNOG00000018289	Park7	5:167982439-168000083	6.3916	0.0871163	7.00046	0.000132791	0.00459727
ENSRNOT00000084236	Ncor2-202	ENSRNOG00000001004	Ncor2	12:36872020-37032904	21.1961	6.11443	2.59561	0.000132889	0.00459768
ENSRNOT00000013560	Ift43-201	ENSRNOG00000010194	Ift43	6:109939345-110016644	13.7697	2.50739	3.25103	0.000133049	0.00460024
ENSRNOT00000041044	Pwwp3b-201	ENSRNOG00000030475	Pwwp3b	X:110404022-110411039	0.830299	0	11.8371	0.000133186	0.00460203
ENSRNOT00000080288	Clmp-201	ENSRNOG00000053239	Clmp	8:44847157-44975457	0.270311	5.08328	-3.43183	0.000133417	0.00460703
ENSRNOT00000079269	Nwd2-201	ENSRNOG00000051837	Nwd2	14:46136786-46153212	0	0.621545	-11.8428	0.000134472	0.00463915
ENSRNOT00000013768	Cd180-201	ENSRNOG00000010266	Cd180	2:32820322-32833125	0	0.801851	-11.8614	0.000134521	0.00463915
ENSRNOT00000067009	Rlim-201	ENSRNOG00000045695	Rlim	X:74843186-74847379	8.85741	0.069753	7.72461	0.000134847	0.00464441
ENSRNOT00000088956	Nckap1l-202	ENSRNOG00000036829	Nckap1l	7:145068286-145112509	0.002757	2.19541	-8.74257	0.000135267	0.00465589
ENSRNOT00000012545	Clasp2-201	ENSRNOG00000009161	Clasp2	8:122076759-122185495	0.443601	19.7468	-4.70785	0.000135722	0.00466555
ENSRNOT00000071003	Ugt1a1-208	ENSRNOG00000018740	Ugt1a1	9:95233957-95302810	0.034752	6.64429	-6.81805	0.000135953	0.00466947
ENSRNOT00000036537	Gpr17-201	ENSRNOG00000025745	Gpr17	18:24734330-24735349	0	10.7317	-11.9405	0.000136011	0.00466947
ENSRNOT00000008985	Nell2-201	ENSRNOG00000006235	Nell2	7:136526496-136853957	0.027937	3.937	-6.35426	0.000136366	0.00467508
ENSRNOT00000086456	Tnip1-202	ENSRNOG00000010370	Tnip1	10:40256327-40296470	5.99439	0.686006	3.91606	0.000136436	0.00467508
ENSRNOT00000010620	Sema7a-201	ENSRNOG00000007687	Sema7a	8:62723788-62745868	59.7182	15.0654	2.79222	0.000137864	0.00470776
ENSRNOT00000088149	Flnc-202	ENSRNOG00000007281	Flnc	4:56711275-56738100	48.9854	12.3716	2.79352	0.000140113	0.00477661
ENSRNOT00000022400	Tln1-201	ENSRNOG00000016630	Tln1	5:59033636-59063592	227.542	69.5736	2.51675	0.000140906	0.00479708
ENSRNOT00000044595	Lrrc4c-201	ENSRNOG00000029798	Lrrc4c	3:86621205-86819375	0.176548	3.35786	-3.45419	0.000141253	0.00480324
ENSRNOT00000007949	Il1rn-201	ENSRNOG00000005871	Il1rn	3:1452644-1468614	0	0.658871	-11.8882	0.000141759	0.00481739
ENSRNOT00000001691	Atxn2-201	ENSRNOG00000001256	Atxn2	12:40266662-40332612	16.2956	3.87692	2.88012	0.000142778	0.00484891
ENSRNOT00000025450	Htr7-201	ENSRNOG00000018827	Htr7	1:254547627-254671596	0.278316	0	14.3328	0.000143205	0.00485725
ENSRNOT00000014672	Foxn1-201	ENSRNOG00000010870	Foxn1	10:65621257-65634666	0.420699	0	11.793	0.000144319	0.00488885
ENSRNOT00000065396	Etv1-201	ENSRNOG00000006867	Etv1	6:58467254-58558631	0.312622	7.08918	-3.67968	0.000145496	0.00491937
TCONS_00348956	TCONS_00348956	XLOC_277215	XLOC_277215	7:10696216-10722319	0	0.404717	-11.908	0.000147227	0.00497161
ENSRNOT00000011775	Unc79-201	ENSRNOG00000008728	Unc79	6:126874193-127064626	0.303746	4.8411	-3.1927	0.000147558	0.00497966
ENSRNOT00000079488	St6gal2-202	ENSRNOG00000046515	St6gal2	9:6970507-7053387	0	0.20309	-12.559	0.00014789	0.00498772
ENSRNOT00000085222	RGD1559482-202	ENSRNOG00000048771	RGD1559482	10:104952237-104980890	0	0.355914	-11.8558	0.000148846	0.00500735
ENSRNOT00000078993	Adora1-202	ENSRNOG00000003442	Adora1	13:51043334-51076852	0	0.295151	-11.8038	0.000150106	0.00503706
ENSRNOT00000091927	Ppp2r2c-202	ENSRNOG00000058202	Ppp2r2c	14:78679214-78707861	0.204022	0	11.8245	0.000150887	0.00505759
ENSRNOT00000047843	Itsn1-202	ENSRNOG00000002001	Itsn1	11:31943119-32031481	10.3583	1.70825	3.42578	0.000150907	0.00505759
ENSRNOT00000083990	Zfp488-201	ENSRNOG00000057542	Zfp488	16:10294931-10296341	0	7.14801	-11.8243	0.000151279	0.00506689
ENSRNOT00000025880	Dpysl3-201	ENSRNOG00000018992	Dpysl3	18:37716143-37819097	242.941	76.0397	2.47997	0.000151884	0.00508079
ENSRNOT00000072875	Nupr1l1-202	ENSRNOG00000050922	Nupr1l1	1:198043073-198045154	54.4777	4.02325	4.55243	0.000153097	0.00511499
ENSRNOT00000049292	Kalrn-202	ENSRNOG00000001706	Kalrn	11:69484293-70025633	5.88168	1.71466	2.58512	0.000153335	0.00511908
ENSRNOT00000041924	Nhs-201	ENSRNOG00000030759	Nhs	X:34623405-34672940	0.114704	0	11.7883	0.000155485	0.00518505
ENSRNOT00000073034	C5ar1-201	ENSRNOG00000047800	C5ar1	1:78186776-78195328	0	1.17065	-11.8183	0.000156212	0.00520323
ENSRNOT00000004923	Fam184b-201	ENSRNOG00000003704	Fam184b	14:70015754-70086143	0	0.151364	-11.9012	0.000156224	0.00520323
ENSRNOT00000089269	Ano4-202	ENSRNOG00000006841	Ano4	7:29492016-29701721	0.00545467	0.970448	-6.69472	0.000156792	0.0052189
ENSRNOT00000041908	Fmo1-201	ENSRNOG00000034191	Fmo1	13:80712882-80745347	0.0569217	3.74431	-5.21475	0.000157294	0.00523234
ENSRNOT00000028328	Bax-201	ENSRNOG00000020876	Bax	1:101451802-101457207	31.6419	2.84813	4.28311	0.000160453	0.0053209
ENSRNOT00000038057	Crtc1-201	ENSRNOG00000022421	Crtc1	16:20740826-20794039	8.63558	1.56834	3.26951	0.00016118	0.00533509
ENSRNOT00000011339	Jdp2-201	ENSRNOG00000008224	Jdp2	6:109466060-109505161	24.474	5.70007	2.90746	0.000161593	0.00534546
ENSRNOT00000056654	Macc1-201	ENSRNOG00000037436	Macc1	6:147315328-147394269	0.068382	0	11.7368	0.000161969	0.00535008
ENSRNOT00000034300	Loxl1-201	ENSRNOG00000008680	Loxl1	8:63067300-63092009	45.4406	11.2772	2.81565	0.000163227	0.00537827
ENSRNOT00000083895	Krt14-202	ENSRNOG00000003899	Krt14	10:88055823-88122233	0.0952627	0	11.9873	0.000163288	0.00537827
ENSRNOT00000042384	Robo1-201	ENSRNOG00000029614	Robo1	11:9642413-10143317	0.628037	0.006901	7.34209	0.000164709	0.00541837
ENSRNOT00000081173	Add2-202	ENSRNOG00000015903	Add2	4:117744075-117873700	0.0130063	2.24112	-6.61882	0.000164816	0.00541856
ENSRNOT00000028195	Dhcr7-201	ENSRNOG00000020776	Dhcr7	1:217018916-217034890	3.15569	60.8774	-3.46023	0.000165081	0.00542311
ENSRNOT00000016088	Ptn-201	ENSRNOG00000011946	Ptn	4:64239158-64330996	31.2114	311.173	-2.51254	0.000166831	0.00546805
ENSRNOT00000072869	Rusc2-201	ENSRNOG00000045843	Rusc2	5:58855773-58882096	46.6378	11.7858	2.79395	0.000167725	0.00549396
ENSRNOT00000058887	Dock5-201	ENSRNOG00000024703	Dock5	15:44453308-44627765	18.3858	5.41527	2.56808	0.000169205	0.00553906
ENSRNOT00000019104	Psmd7-201	ENSRNOG00000014097	Psmd7	19:39639431-39646693	44.8913	7.44706	3.3993	0.00017057	0.00557011
ENSRNOT00000011654	Nsfl1c-201	ENSRNOG00000008604	Nsfl1c	3:146980923-147005439	35.354	8.0978	2.93349	0.000171025	0.00557816
ENSRNOT00000022328	Spag6l-201	ENSRNOG00000025787	Spag6l	11:88424414-88508601	0.017353	3.07619	-6.609	0.000171608	0.00558697
ENSRNOT00000029764	Eea1-201	ENSRNOG00000021681	Eea1	7:37101391-37186534	0.283047	0	13.9247	0.000172107	0.00559981
ENSRNOT00000038816	Moap1-201	ENSRNOG00000033970	Moap1	6:126620602-126622532	2.90763	0	11.8132	0.000172723	0.00561458
ENSRNOT00000037752	Ppp1r1b-201	ENSRNOG00000028404	Ppp1r1b	10:86303727-86312762	5.32132	87.5598	-3.23832	0.000174647	0.00566522
ENSRNOT00000080923	Scn8a-202	ENSRNOG00000005309	Scn8a	7:142575672-142684114	0.020222	1.33641	-5.27151	0.000176554	0.00572017
ENSRNOT00000085216	Parvg-201	ENSRNOG00000052064	Parvg	7:125288081-125306976	0	0.499728	-11.7411	0.000176764	0.00572234
ENSRNOT00000011714	Tbc1d2-201	ENSRNOG00000023348	Tbc1d2	5:62212982-62260105	3.82347	0.451196	3.88638	0.000177275	0.00573311
ENSRNOT00000019392	Chac1-201	ENSRNOG00000014387	Chac1	3:111160205-111163425	24.3278	1.43225	4.88879	0.000177876	0.00574907
ENSRNOT00000014491	Scg3-201	ENSRNOG00000010784	Scg3	8:82582352-82641536	1.11781	16.8765	-3.1076	0.000178369	0.00576152
ENSRNOT00000054719	Entpd1-201	ENSRNOG00000014574	Entpd1	1:259739955-259819494	0.208312	6.40033	-4.12358	0.000179598	0.00578378
ENSRNOT00000025097	Olr59-201	ENSRNOG00000018606	Olr59	1:167906061-167911961	0.862352	0	11.647	0.000179712	0.00578396
ENSRNOT00000015333	Bag5l1-201	ENSRNOG00000011527	Bag5l1	6:136276057-136279399	5.83423	0.0766227	7.0147	0.00018014	0.00578861
ENSRNOT00000022574	Stmn1-201	ENSRNOG00000016810	Stmn1	5:152681131-152686806	5.37028	0	14.2879	0.000180289	0.00578861
TCONS_00092483	TCONS_00092483	XLOC_069560	XLOC_069560	13:49986901-50083087	0.112227	0	12.7588	0.000181263	0.00581292
ENSRNOT00000071572	AABR07015067.1-201	ENSRNOG00000048268	AABR07015067.1	14:46588411-46593828	0.959496	0	11.683	0.000182125	0.00583005
ENSRNOT00000023196	Pdgfb-201	ENSRNOG00000017197	Pdgfb	7:121214628-121232741	32.2961	6.72687	3.06542	0.00018427	0.00588817
ENSRNOT00000048236	Nudt11-201	ENSRNOG00000046053	Nudt11	X:17171605-17215100	0.509892	10.2575	-3.53667	0.000184411	0.00588915
ENSRNOT00000005644	Itga3-201	ENSRNOG00000004276	Itga3	10:82855613-82887497	26.1603	6.00855	2.92799	0.000185058	0.00590279
ENSRNOT00000060767	Akap12-202	ENSRNOG00000019549	Akap12	1:40816107-40906581	23.2764	6.03074	2.74936	0.000187331	0.00596108
ENSRNOT00000089789	Coro2a-202	ENSRNOG00000008901	Coro2a	5:62156839-62186372	0.182521	0	11.7405	0.000188071	0.00597042
ENSRNOT00000019880	Il1rl2-201	ENSRNOG00000014683	Il1rl2	9:47047832-47095831	3.94992	0.490738	3.8076	0.00019029	0.00603729
ENSRNOT00000016688	Asah2-201	ENSRNOG00000012196	Asah2	1:250559467-250630677	0.125332	0	12.3886	0.000190804	0.00604643
ENSRNOT00000027445	Myl9-201	ENSRNOG00000020246	Myl9	3:152857592-152863960	404.842	114.431	2.62714	0.000193751	0.00612409
ENSRNOT00000010730	Sync-201	ENSRNOG00000008118	Sync	5:147476221-147498902	17.6929	3.17441	3.28615	0.000193869	0.00612409
ENSRNOT00000015198	Laptm5-201	ENSRNOG00000011054	Laptm5	5:149047681-149069719	0.0144413	4.39199	-7.3673	0.000194025	0.00612409
ENSRNOT00000076099	AABR07068272.1-202	ENSRNOG00000023577	AABR07068272.1	9:94425256-94525152	7.45107	1.62022	3.01324	0.000194285	0.00612409
ENSRNOT00000089082	Palmd-201	ENSRNOG00000058609	Palmd	2:220481616-220535751	8.21396	1.51899	3.23498	0.000196053	0.00616347
ENSRNOT00000061746	Stpg4-201	ENSRNOG00000040136	Stpg4	6:11022073-11063092	0.123763	0	11.6412	0.00019611	0.00616347
ENSRNOT00000025536	Ntrk3-201	ENSRNOG00000018674	Ntrk3	1:139992204-140262452	0.324606	4.65745	-3.02669	0.000196567	0.0061742
ENSRNOT00000027809	Rras-201	ENSRNOG00000037247	Rras	1:101012822-101016720	103.758	17.9224	3.3322	0.000196814	0.00617834
ENSRNOT00000018497	Akip1-201	ENSRNOG00000013744	Akip1	1:174330695-174339494	0.554987	0	11.5884	0.00019709	0.00618337
ENSRNOT00000022200	Ngf-201	ENSRNOG00000016571	Ngf	2:204886202-204939523	3.13141	0	16.7413	0.000199655	0.00625287
ENSRNOT00000006373	Rtn1-201	ENSRNOG00000004794	Rtn1	6:94951020-94980004	6.91099	82.989	-2.76899	0.000200312	0.0062652
TCONS_00213740	TCONS_00213740	XLOC_169467	XLOC_169467	2:145427120-145513115	0.915624	13.3139	-3.05675	0.000203191	0.00633479
ENSRNOT00000018416	Elavl3-201	ENSRNOG00000013752	Elavl3	8:23030118-23063041	0.0239147	5.11437	-6.90095	0.000203642	0.00634165
ENSRNOT00000018074	Rcn1-201	ENSRNOG00000013452	Rcn1	3:95406284-95418679	220.265	65.2486	2.55706	0.000204631	0.00636402
ENSRNOT00000004373	C1qtnf1-201	ENSRNOG00000003259	C1qtnf1	10:107455845-107476036	18.0326	2.83561	3.4926	0.000205049	0.0063696
ENSRNOT00000002885	Sod1-201	ENSRNOG00000002115	Sod1	11:30363280-30368862	133.142	28.4403	3.02982	0.000206029	0.00639263
ENSRNOT00000019393	Dbn1-201	ENSRNOG00000014170	Dbn1	17:9679665-9693083	17.9726	2.4584	3.70045	0.000207083	0.00641788
ENSRNOT00000076557	Bms1-202	ENSRNOG00000006576	Bms1	4:150443667-150471834	0.200195	0	11.8251	0.000207483	0.00641952
ENSRNOT00000016070	Srcin1-201	ENSRNOG00000011475	Srcin1	10:85460059-85517683	0.076115	3.06435	-4.51234	0.000208588	0.00644697
ENSRNOT00000064306	Pbk-201	ENSRNOG00000015308	Pbk	15:42489377-42500395	2.39088	44.3167	-3.40983	0.000208624	0.00644697
ENSRNOT00000044778	Stxbp5-202	ENSRNOG00000013351	Stxbp5	1:3862091-4011161	0.158182	0	13.8856	0.000210591	0.00650027
ENSRNOT00000043554	Arrb1-201	ENSRNOG00000030404	Arrb1	1:164502389-164593139	1.64382	20.2954	-2.81631	0.00021091	0.00650635
ENSRNOT00000021725	Rpl12-201	ENSRNOG00000016220	Rpl12	3:12009578-12011666	196.423	33.7793	3.33849	0.000211559	0.00652223
ENSRNOT00000040029	Eif4g1-201	ENSRNOG00000001738	Eif4g1	11:83908109-83926524	57.9655	9.76353	3.38425	0.00021179	0.00652223
ENSRNOT00000078175	Dctn1-202	ENSRNOG00000010048	Dctn1	4:114876833-114896573	41.6746	0.220601	8.401	0.000212019	0.00652553
ENSRNOT00000016291	Cd2ap-201	ENSRNOG00000011987	Cd2ap	9:20765296-20858504	9.7494	2.32363	2.87262	0.000214015	0.00657939
ENSRNOT00000041961	Fhod3-201	ENSRNOG00000027230	Fhod3	18:16650806-17332205	0.0218897	3.22783	-6.452	0.000215482	0.0066207
ENSRNOT00000048125	Myl12b-201	ENSRNOG00000015733	Myl12b	9:119307176-119321500	209.825	63.47	2.53107	0.000216536	0.00664546
ENSRNOT00000006350	Zeb2-201	ENSRNOG00000004677	Zeb2	3:29862473-29984201	16.9476	3.92536	2.90249	0.000218529	0.00669127
ENSRNOT00000014230	Smarce1-201	ENSRNOG00000010676	Smarce1	10:87117887-87136026	0.262873	0	11.5423	0.000218759	0.00669448
ENSRNOT00000067612	Gldc-201	ENSRNOG00000011599	Gldc	1:248297331-248377093	0.902281	13.0998	-3.05116	0.000220009	0.00672503
ENSRNOT00000070832	Wnt7a-201	ENSRNOG00000048782	Wnt7a	4:122994425-123040609	2.34227	30.3876	-2.89702	0.000221333	0.00675392
ENSRNOT00000013588	Rps24-201	ENSRNOG00000010189	Rps24	16:757452-762075	25.5215	0.284471	7.28208	0.000221677	0.00675672
ENSRNOT00000093016	Arhgef2-206	ENSRNOG00000020027	Arhgef2	2:187988995-188006094	7.76546	0.582686	4.52724	0.00022191	0.00675998
ENSRNOT00000006157	Meis1-201	ENSRNOG00000004606	Meis1	14:103181281-103321270	11.3578	2.76341	2.84141	0.000222321	0.00676866
ENSRNOT00000073160	Rps19l2-201	ENSRNOG00000048199	Rps19l2	9:16802319-16807966	336.696	94.3328	2.64627	0.000223661	0.00680171
ENSRNOT00000068011	Rbpms-202	ENSRNOG00000013328	Rbpms	16:61954809-62096497	0.0348847	0	11.6263	0.000224024	0.00680887
ENSRNOT00000083005	Map1a-202	ENSRNOG00000014230	Map1a	3:113251778-113272186	0.269736	15.4149	-5.00642	0.000224996	0.0068268
ENSRNOT00000077002	Zfp449-202	ENSRNOG00000050562	Zfp449	X:73390903-73412775	1.0088	0	13.7606	0.000225419	0.00683575
ENSRNOT00000047434	Fcgr3a-201	ENSRNOG00000024382	Fcgr3a	13:89385859-89396051	0	1.30288	-12.1993	0.000227421	0.00688864
ENSRNOT00000034843	Tsku-201	ENSRNOG00000027784	Tsku	1:163317282-163328591	49.227	10.5875	3.02382	0.000228169	0.0069074
ENSRNOT00000013516	Tgfb3-201	ENSRNOG00000009867	Tgfb3	6:109913757-109935533	181.469	56.9782	2.47561	0.000229315	0.00693032
ENSRNOT00000078640	Mboat7-201	ENSRNOG00000054459	Mboat7	1:64101018-64113792	0	5.74189	-14.729	0.000230046	0.00694457
ENSRNOT00000038449	Zfp385d-201	ENSRNOG00000014661	Zfp385d	15:6200829-6587367	4.79178	1.1086	2.91303	0.000230783	0.00696238
ENSRNOT00000040898	Pappa1-201	ENSRNOG00000033527	Pappa1	5:80920621-81150940	0.0198533	0	11.4996	0.000230984	0.00696238
ENSRNOT00000068394	Adamts7-202	ENSRNOG00000028036	Adamts7	8:97535777-97575655	1.09088	0.0341033	5.78122	0.000231325	0.00696612
ENSRNOT00000085985	Ank3-204	ENSRNOG00000053288	Ank3	20:20259254-20480362	1.73849	0.043354	6.11904	0.000232778	0.00699549
ENSRNOT00000080146	Jak3-203	ENSRNOG00000018669	Jak3	16:20110148-20120662	1.23733	0	12.9225	0.000232984	0.00699594
ENSRNOT00000038983	Tanc1-201	ENSRNOG00000025394	Tanc1	3:45683993-45917745	19.4768	6.20807	2.4578	0.000233054	0.00699594
ENSRNOT00000005873	Gtf2a1-201	ENSRNOG00000004300	Gtf2a1	6:115320467-115352681	4.4346	0.377311	4.34829	0.000233452	0.00700394
ENSRNOT00000034924	Rdx-201	ENSRNOG00000012237	Rdx	8:56585396-56610612	25.6577	5.65938	2.99152	0.000233709	0.00700772
ENSRNOT00000080694	Hydin-204	ENSRNOG00000017178	Hydin	19:41036715-41349681	0.0334877	0.961389	-4.01831	0.000236679	0.00708092
ENSRNOT00000040069	Eln-202	ENSRNOG00000001469	Eln	12:24978483-25020907	14.7442	0.35108	6.18176	0.000237739	0.0071047
TCONS_00213738	TCONS_00213738	XLOC_169467	XLOC_169467	2:145422390-145513092	3.77621	0.529829	3.6326	0.000238616	0.00712295
ENSRNOT00000024030	Tagln-201	ENSRNOG00000017628	Tagln	8:50222896-50228369	4759.47	1555.91	2.41861	0.0002388	0.00712446
ENSRNOT00000050393	Vps35l-201	ENSRNOG00000016063	Vps35l	1:188448604-188552265	1.42623	0	16.5249	0.000239155	0.00712986
ENSRNOT00000057030	Rplp2-201	ENSRNOG00000037607	Rplp2	1:214428526-214430515	155.661	26.8604	3.33972	0.000239247	0.00712986
ENSRNOT00000076604	Dync1li2-206	ENSRNOG00000025791	Dync1li2	19:740028-761527	19.1125	3.24737	3.33464	0.000240069	0.00715038
ENSRNOT00000008184	Adam19-201	ENSRNOG00000042980	Adam19	10:31146107-31240582	33.4472	10.2838	2.5117	0.000240803	0.00716825
ENSRNOT00000077894	Fosl2-201	ENSRNOG00000052357	Fosl2	6:25598936-25616995	24.7592	4.65701	3.22194	0.000243916	0.00724881
ENSRNOT00000091057	Fstl1-202	ENSRNOG00000002746	Fstl1	11:65792207-65845418	967.054	322.848	2.38557	0.000244677	0.00726739
ENSRNOT00000064041	Bcl9l-201	ENSRNOG00000012420	Bcl9l	8:48805684-48834312	26.7939	6.34229	2.88472	0.000247133	0.00733627
ENSRNOT00000068381	Mecom-201	ENSRNOG00000012645	Mecom	2:117396007-117454769	0.078411	0	11.5228	0.000247897	0.00734397
ENSRNOT00000017555	Nop53-201	ENSRNOG00000013023	Nop53	1:77836196-77844189	43.3821	7.66787	3.30216	0.000249852	0.0073924
ENSRNOT00000086186	Igsf10-202	ENSRNOG00000013917	Igsf10	2:149533151-149563905	0.410174	10.6326	-3.8946	0.000252138	0.00744358
ENSRNOT00000019162	Rpl35-201	ENSRNOG00000014272	Rpl35	3:23294814-23297774	113.784	6.89984	4.81907	0.000252634	0.00745409
ENSRNOT00000017486	Sparc-201	ENSRNOG00000012840	Sparc	10:40742400-40764185	3782.08	1265.77	2.38139	0.000254131	0.00749002
ENSRNOT00000075483	Chsy3-201	ENSRNOG00000050152	Chsy3	18:54243949-54496585	2.97341	0.652726	2.98207	0.00025633	0.0075385
ENSRNOT00000005623	Slc9a7-201	ENSRNOG00000004150	Slc9a7	X:2435305-2614770	0.503661	6.68001	-2.92699	0.000256985	0.00755332
ENSRNOT00000027813	Vav3-201	ENSRNOG00000020485	Vav3	2:212247451-212585818	0.18971	2.8519	-3.1131	0.000260469	0.00764423
ENSRNOT00000042754	Phldb2-203	ENSRNOG00000002171	Phldb2	11:57404196-57481567	0	0.111535	-11.5894	0.000260506	0.00764423
ENSRNOT00000016475	Mgarp-201	ENSRNOG00000011923	Mgarp	2:140444965-140453107	13.6677	0.934683	4.65324	0.000264	0.00772979
ENSRNOT00000092379	Lrrtm4-203	ENSRNOG00000021938	Lrrtm4	4:110700403-111497643	0	0.0515997	-13.8555	0.000265013	0.00775097
ENSRNOT00000089074	Myl6-203	ENSRNOG00000054140	Myl6	7:2906137-2909179	403.205	105.975	2.73193	0.00026523	0.00775307
ENSRNOT00000025258	Ankrd1-201	ENSRNOG00000018598	Ankrd1	1:254726969-254735548	10.123	0.731451	4.5936	0.000266489	0.00778045
ENSRNOT00000022017	Prrc1-201	ENSRNOG00000016433	Prrc1	18:52423883-52457575	50.1245	14.4414	2.6054	0.000266602	0.00778045
ENSRNOT00000075144	Clasrp-201	ENSRNOG00000046000	Clasrp	1:80491521-80515694	5.61541	0.0343437	8.10188	0.000267429	0.00780034
ENSRNOT00000089852	Dnajc8-202	ENSRNOG00000013255	Dnajc8	5:150725654-150743730	0.0804437	8.51324	-5.88263	0.000267885	0.00780513
ENSRNOT00000078872	Hnrnpa3-201	ENSRNOG00000052968	Hnrnpa3	3:62481323-62487227	24.9428	2.34396	4.22006	0.000270142	0.00785378
ENSRNOT00000006805	Bcorl1-201	ENSRNOG00000005076	Bcorl1	X:135187468-135233839	7.44733	1.37189	3.24955	0.000270734	0.00786671
ENSRNOT00000092499	Lamc2-204	ENSRNOG00000002667	Lamc2	13:70567635-70625842	0.348958	0	13.6513	0.00027112	0.00787365
ENSRNOT00000043230	Fam162a-202	ENSRNOG00000002255	Fam162a	11:67618706-67644742	47.4801	10.6892	2.97161	0.000273778	0.00794222
ENSRNOT00000090849	March2-203	ENSRNOG00000007769	2021-03-02	7:18559736-18577368	0.149573	14.8077	-5.81332	0.00027578	0.00799597
ENSRNOT00000036374	Togaram2-201	ENSRNOG00000026344	Togaram2	6:23359009-23404368	0.0497867	2.70289	-4.93426	0.000276113	0.00800128
ENSRNOT00000068323	Rps28-201	ENSRNOG00000042886	Rps28	7:18682071-18683440	238.203	29.1694	3.81455	0.000276865	0.00801441
ENSRNOT00000026234	Klhl40-201	ENSRNOG00000019390	Klhl40	8:130416355-130421871	7.56402	0.192587	6.10073	0.000278215	0.00804815
ENSRNOT00000081616	Hephl1-201	ENSRNOG00000056092	Hephl1	8:13614800-13680870	0	0.155907	-11.8764	0.000278692	0.00805018
ENSRNOT00000080410	Bcat1-202	ENSRNOG00000015514	Bcat1	4:179259308-179339795	28.1514	3.48238	3.78961	0.000282149	0.00812794
ENSRNOT00000021048	Myl12a-201	ENSRNOG00000015278	Myl12a	9:119325283-119332967	1146.68	386.661	2.37517	0.000284861	0.00820153
ENSRNOT00000005612	Eno3-201	ENSRNOG00000004078	Eno3	10:57278307-57283653	13.0816	0.754535	4.9169	0.000286263	0.0082286
ENSRNOT00000076084	Mef2c-202	ENSRNOG00000033134	Mef2c	2:11658568-11820093	0.025894	0	11.374	0.000289143	0.008298
ENSRNOT00000046192	Adcyap1r1-204	ENSRNOG00000012098	Adcyap1r1	4:85662892-85711696	0	5.51318	-16.5573	0.000289331	0.00829897
ENSRNOT00000024658	Slc28a2-201	ENSRNOG00000028668	Slc28a2	3:114355798-114647382	0.042204	1.1392	-3.97433	0.000290242	0.00831173
ENSRNOT00000003782	NEWGENE_1559832-201	ENSRNOG00000002824	NEWGENE_1559832	X:73762778-73778674	2.74157	0.0129133	8.5219	0.000291437	0.00833703
ENSRNOT00000060311	Tcp11l1-201	ENSRNOG00000042576	Tcp11l1	3:94624269-94653682	7.00943	0.569917	4.39944	0.000292473	0.00835863
ENSRNOT00000020894	Dnah6-201	ENSRNOG00000015581	Dnah6	4:100936978-101156576	0.003294	0.636887	-6.7392	0.000292803	0.00835863
ENSRNOT00000088618	Lmo4-204	ENSRNOG00000009205	Lmo4	2:250218670-250235435	87.918	24.1201	2.66995	0.000293077	0.00836159
ENSRNOT00000073355	Ttc23-202	ENSRNOG00000013877	Ttc23	1:128606770-128687654	1.49767	0	16.2783	0.000296007	0.00842018
ENSRNOT00000022292	Dclk2-201	ENSRNOG00000016550	Dclk2	2:186119729-186245361	3.56714	36.2322	-2.54719	0.000296074	0.00842018
ENSRNOT00000066780	Nexn-202	ENSRNOG00000012512	Nexn	2:257453546-257474733	0.234682	0	11.5854	0.000297049	0.00843865
ENSRNOT00000085448	Hdlbp-202	ENSRNOG00000031479	Hdlbp	9:100554563-100588951	133.903	44.0022	2.41159	0.000297122	0.00843865
ENSRNOT00000092322	Prrc2a-202	ENSRNOG00000000852	Prrc2a	20:5139882-5155293	67.6663	17.1284	2.78504	0.000297197	0.00843865
ENSRNOT00000010541	Evc-201	ENSRNOG00000007564	Evc	14:78213635-78253266	3.65422	0.073763	6.45364	0.000297958	0.00845578
ENSRNOT00000090506	Pdzrn3-201	ENSRNOG00000057556	Pdzrn3	4:133717139-133951264	84.3987	28.8669	2.35056	0.00030277	0.00857416
ENSRNOT00000089497	Ppp1r9b-201	ENSRNOG00000052113	Ppp1r9b	10:82800704-82816731	39.6676	9.00798	2.95122	0.000303138	0.00858004
ENSRNOT00000035400	Fcgr2b-201	ENSRNOG00000046452	Fcgr2b	13:89329304-89343899	0	0.500197	-11.3561	0.000303473	0.00858499
ENSRNOT00000078757	Flot2-203	ENSRNOG00000009681	Flot2	10:65304902-65329312	0.42592	0	12.6798	0.000305587	0.00863564
ENSRNOT00000076044	Prdm16-203	ENSRNOG00000045913	Prdm16	5:171666955-171710312	0.451829	0	13.5495	0.000306095	0.00864546
ENSRNOT00000043216	Unc13b-201	ENSRNOG00000008237	Unc13b	5:58505500-58715576	6.67371	1.66575	2.79714	0.000308698	0.00870517
ENSRNOT00000090193	Ndufaf2-201	ENSRNOG00000055079	Ndufaf2	2:39321741-39434560	0.168768	0	13.5427	0.000309173	0.00871399
ENSRNOT00000023029	Nck2-201	ENSRNOG00000017155	Nck2	9:50247692-50373284	13.9536	4.1096	2.56985	0.000310517	0.00873806
ENSRNOT00000068185	Ybx3-202	ENSRNOG00000005480	Ybx3	4:165606821-165629996	64.6908	18.0826	2.63517	0.000313116	0.00880196
ENSRNOT00000064288	Lims1-201	ENSRNOG00000037765	Lims1	20:27954433-28002082	13.7046	2.46801	3.28253	0.000313496	0.008807
ENSRNOT00000046611	Spint2-202	ENSRNOG00000020636	Spint2	1:87199377-87221826	54.6593	15.1637	2.65345	0.000314179	0.00881795
ENSRNOT00000021133	Ppp1r16b-201	ENSRNOG00000015614	Ppp1r16b	3:155160481-155262941	0.0133247	5.41035	-7.93303	0.000314973	0.00883559
ENSRNOT00000076234	Grik2-202	ENSRNOG00000000368	Grik2	20:53789954-54517709	0.166248	3.84847	-3.73043	0.000315142	0.00883571
ENSRNOT00000067448	Insr-202	ENSRNOG00000029986	Insr	12:1682527-1816414	0	1.80163	-16.4466	0.000316184	0.00886027
ENSRNOT00000051841	LOC100911672-201	ENSRNOG00000049575	LOC100911672	9:20264418-20278261	14.886	2.2234	3.54563	0.000316519	0.00886501
ENSRNOT00000090259	LOC103694865-201	ENSRNOG00000054871	LOC103694865	KL568414.1:83509-113951	3.62159	0.0664173	6.59351	0.000317336	0.00888325
ENSRNOT00000001201	Hsph1-201	ENSRNOG00000000902	Hsph1	12:6322668-6341902	67.9774	19.3386	2.62106	0.00031752	0.00888375
ENSRNOT00000012658	Sfrp2-201	ENSRNOG00000009465	Sfrp2	2:182723854-182731764	0.0694077	8.5382	-6.07076	0.000320794	0.00896598
ENSRNOT00000086502	Synpr-202	ENSRNOG00000008203	Synpr	15:14559997-14622587	0.372235	0	13.8923	0.000321389	0.00897794
ENSRNOT00000037255	Ank2-203	ENSRNOG00000011076	Ank2	2:231231827-231409988	0.648502	0	16.1691	0.000323966	0.00903577
ENSRNOT00000082618	Fancd2-201	ENSRNOG00000061085	Fancd2	4:145489869-145551479	1.50535	19.3274	-2.87013	0.000325102	0.00906272
ENSRNOT00000059510	Carmil1-201	ENSRNOG00000016576	Carmil1	17:43050961-43339403	0.0655937	0	13.5596	0.000325401	0.00906633
ENSRNOT00000087718	Sec63-202	ENSRNOG00000000314	Sec63	20:47494424-47559979	6.09305	0.630874	4.05048	0.000326547	0.0090888
ENSRNOT00000089638	Derl2-201	ENSRNOG00000055466	Derl2	10:57644207-57653359	38.2991	7.39371	3.18034	0.000332628	0.00923885
TCONS_00040047	TCONS_00040047	XLOC_030485	XLOC_030485	1:216844953-216859712	0.279078	0	11.326	0.000333801	0.00926182
ENSRNOT00000041407	Plcd4-202	ENSRNOG00000016361	Plcd4	9:81816872-81844364	0.151729	6.10104	-4.50157	0.000334138	0.00926635
ENSRNOT00000025027	Olr63-201	ENSRNOG00000018551	Olr63	1:167870452-167871405	4.11285	0	11.2689	0.00033494	0.00928319
ENSRNOT00000005584	Sybu-201	ENSRNOG00000004200	Sybu	7:83600617-83670356	0.601739	9.27538	-3.14885	0.000337754	0.00932796
ENSRNOT00000015152	Hnrnpa2b1-201	ENSRNOG00000011175	Hnrnpa2b1	4:81237496-81241282	52.4845	7.45931	3.62671	0.000338255	0.00933237
ENSRNOT00000026646	Eif4e2-201	ENSRNOG00000019634	Eif4e2	9:94310921-94326889	47.1596	11.6163	2.82749	0.000342419	0.00942723
ENSRNOT00000011801	Nav1-201	ENSRNOG00000008425	Nav1	13:52267453-52413681	0.752929	0	16.0996	0.000342581	0.00942723
ENSRNOT00000076398	Rffl-204	ENSRNOG00000007596	Rffl	10:70157626-70220560	2.11438	0.1951	4.27361	0.000343881	0.00945813
ENSRNOT00000019929	Gpr149-201	ENSRNOG00000014793	Gpr149	2:152839117-152911553	0.176632	4.08115	-3.73035	0.000345358	0.00948913
ENSRNOT00000079989	Sh3gl3-202	ENSRNOG00000019776	Sh3gl3	1:144070754-144200397	1.00218	12.5435	-2.8578	0.000345735	0.00949449
ENSRNOT00000088170	Calcrl-202	ENSRNOG00000054695	Calcrl	3:71747956-71798531	0.0914593	3.65542	-4.51807	0.000347504	0.00953329
ENSRNOT00000007160	Klhl29-201	ENSRNOG00000005371	Klhl29	6:29178858-29483460	11.1785	3.68829	2.40408	0.000348562	0.00955742
ENSRNOT00000057641	Tpm1-206	ENSRNOG00000018184	Tpm1	8:72814740-72841496	104.617	29.3094	2.63324	0.000350092	0.00958973
ENSRNOT00000001697	Cux2-201	ENSRNOG00000001259	Cux2	12:40018937-40219291	0.218954	3.48734	-3.19784	0.000350206	0.00958973
ENSRNOT00000018133	Depp1-201	ENSRNOG00000023465	Depp1	4:148782479-148784562	1.85149	0	11.2532	0.000350278	0.00958973
ENSRNOT00000016361	Gab2-201	ENSRNOG00000011882	Gab2	1:162083030-162279727	4.85795	1.28341	2.72647	0.000352512	0.0096361
ENSRNOT00000020524	Nt5c1a-201	ENSRNOG00000015283	Nt5c1a	5:140888973-140904207	0.284281	10.4744	-4.39417	0.000353282	0.00965222
ENSRNOT00000088687	Fam84a-202	ENSRNOG00000004084	Fam84a	6:39359118-39363367	0.498428	26.3054	-4.90591	0.000355444	0.0097014
ENSRNOT00000008728	Pdia4-201	ENSRNOG00000006228	Pdia4	4:77470636-77489535	177.99	57.3538	2.43715	0.00035988	0.00980248
ENSRNOT00000033406	Pf4-201	ENSRNOG00000028015	Pf4	14:18848549-18849258	0	9.6075	-11.2588	0.00036178	0.00984421
ENSRNOT00000040845	Jup-201	ENSRNOG00000015380	Jup	10:88280519-88307132	6.24122	0.336075	4.98157	0.000362507	0.00985897
ENSRNOT00000028070	Ppp1r14a-201	ENSRNOG00000020676	Ppp1r14a	1:87224677-87232848	32.3629	5.80207	3.28373	0.000364647	0.00988991
ENSRNOT00000066932	Scn5a-202	ENSRNOG00000015049	Scn5a	8:128169191-128266639	0.0412287	0	11.3309	0.000365359	0.00990133
ENSRNOT00000006291	Prr5l-201	ENSRNOG00000004666	Prr5l	3:91291875-91370167	0.293681	5.28787	-3.36246	0.000365825	0.00990738
ENSRNOT00000011451	Atp8a2-201	ENSRNOG00000008053	Atp8a2	15:40000322-40428800	1.42591	0.334894	2.89622	0.000365953	0.00990738
ENSRNOT00000086562	Tex9-201	ENSRNOG00000059702	Tex9	8:79083522-79119720	0.469917	0	13.4227	0.000367074	0.0099277
ENSRNOT00000012153	Cadps-201	ENSRNOG00000008570	Cadps	15:15275541-15667778	0.448993	4.92086	-2.64552	0.000367633	0.0099373
ENSRNOT00000008838	Sept7-201	ENSRNOG00000006545	2021-09-07	8:26413358-26475588	7.92819	0.0237843	9.10831	0.000367806	0.0099373
ENSRNOT00000009569	Prdm5-201	ENSRNOG00000023679	Prdm5	4:96659084-96812263	9.3373	2.72945	2.58288	0.000367986	0.0099373
ENSRNOT00000023835	Akr1c14-201	ENSRNOG00000017672	Akr1c14	17:69806065-69827112	0	0.324417	-11.2747	0.000368756	0.00994804
ENSRNOT00000028481	Fau-201	ENSRNOG00000020982	Fau	1:221420271-221421842	465.298	116.176	2.81315	0.000372427	0.010037
ENSRNOT00000086878	Dnajb4-202	ENSRNOG00000013011	Dnajb4	2:257394818-257418425	35.6983	8.89617	2.81091	0.000373735	0.0100578
ENSRNOT00000001695	Col6a2-201	ENSRNOG00000001254	Col6a2	20:12773427-12801180	146.337	49.5392	2.36939	0.000373765	0.0100578
ENSRNOT00000020855	Npas1-201	ENSRNOG00000015376	Npas1	1:78420652-78440738	3.46016	0.20424	4.8843	0.000373993	0.0100589
ENSRNOT00000031871	Nt5dc3-201	ENSRNOG00000026793	Nt5dc3	7:27309966-27363394	15.8013	4.03973	2.77135	0.000376483	0.0101103
ENSRNOT00000037276	Adamts7-201	ENSRNOG00000028036	Adamts7	8:97537968-97575636	11.4513	2.36331	3.08914	0.00037666	0.0101103
ENSRNOT00000088114	Dlg3-208	ENSRNOG00000002767	Dlg3	X:70596901-70646921	0.334376	0	13.3995	0.000377605	0.0101282
ENSRNOT00000038994	Cybb-201	ENSRNOG00000003622	Cybb	X:14578264-14612547	0.00481833	1.5101	-7.35367	0.000377706	0.0101282
ENSRNOT00000010976	Cdk18-201	ENSRNOG00000008137	Cdk18	13:48893412-48927483	2.94572	0.256908	4.32106	0.000378682	0.0101493
ENSRNOT00000028725	Fkbp2-201	ENSRNOG00000021153	Fkbp2	1:222232351-222235102	1.39073	0	11.2193	0.000379298	0.0101607
ENSRNOT00000070843	AABR07012384.1-201	ENSRNOG00000047767	AABR07012384.1	2:194557986-194718294	0.104861	0	13.4153	0.000380067	0.0101762
ENSRNOT00000078599	Chi3l1-201	ENSRNOG00000053272	Chi3l1	13:51022681-51030802	0.498761	18.7557	-4.43845	0.000382707	0.0102418
ENSRNOT00000060111	Cfh-202	ENSRNOG00000030715	Cfh	13:56979169-57080622	0.0774993	2.21646	-4.03229	0.000389535	0.0104059
ENSRNOT00000085788	Depdc5-202	ENSRNOG00000018144	Depdc5	14:83091779-83219071	3.11571	0.449583	3.59495	0.000389591	0.0104059
ENSRNOT00000084709	Cd34-202	ENSRNOG00000045558	Cd34	13:113691932-113711647	0.086833	5.78559	-5.21427	0.000389615	0.0104059
ENSRNOT00000023567	Tpm3-201	ENSRNOG00000017441	Tpm3	2:189430041-189451029	123.995	39.9791	2.43532	0.000390144	0.0104113
ENSRNOT00000025559	Herpud1-201	ENSRNOG00000018796	Herpud1	19:11046909-11057254	46.6188	10.3547	2.97722	0.000390208	0.0104113
ENSRNOT00000014846	Bmp5-201	ENSRNOG00000010917	Bmp5	8:82878941-82950273	0	0.092051	-11.2069	0.000391146	0.0104311
ENSRNOT00000010325	Igsf1-201	ENSRNOG00000007600	Igsf1	X:136792643-136807885	1.16191	23.0982	-3.51101	0.000391372	0.010432
ENSRNOT00000092395	Mapk10-202	ENSRNOG00000002079	Mapk10	14:8080565-8367771	0.437828	5.23016	-2.77916	0.000392326	0.0104478
ENSRNOT00000023144	Fgfr3-201	ENSRNOG00000016818	Fgfr3	14:82273070-82287108	183.418	59.3636	2.43067	0.000392357	0.0104478
ENSRNOT00000050178	B3galt5-201	ENSRNOG00000030983	B3galt5	11:36634662-36683672	0.00610233	1.45895	-7.07254	0.000392651	0.0104504
ENSRNOT00000012233	Dad1-201	ENSRNOG00000009090	Dad1	15:32868087-32888095	105.176	33.4612	2.4604	0.00039672	0.0105535
ENSRNOT00000000607	Tead3-201	ENSRNOG00000000506	Tead3	20:7908226-7930929	16.7957	3.43844	3.09697	0.000397577	0.010571
ENSRNOT00000018564	Kcnj4-201	ENSRNOG00000013869	Kcnj4	7:120717375-120744602	5.03782	0.538675	4.04019	0.00039883	0.0105991
ENSRNOT00000027951	Gipc3-201	ENSRNOG00000020593	Gipc3	7:11245875-11250708	0.75421	0	11.175	0.000399222	0.0105998
ENSRNOT00000077356	Gabarapl1-201	ENSRNOG00000053362	Gabarapl1	4:163293724-163302858	53.4075	11.5638	3.00624	0.000399254	0.0105998
ENSRNOT00000087959	Myo5b-203	ENSRNOG00000014104	Myo5b	18:70427007-70729030	0.0124453	0	11.1979	0.000400395	0.0106196
ENSRNOT00000079776	Tuft1-202	ENSRNOG00000020923	Tuft1	2:195861649-195908037	3.50454	0.438381	3.79056	0.000401754	0.0106504
ENSRNOT00000007197	Csrnp3-201	ENSRNOG00000005359	Csrnp3	3:51883559-52120290	0.0400057	1.25487	-4.19901	0.000407626	0.0107847
ENSRNOT00000043079	Rims2-203	ENSRNOG00000004201	Rims2	7:78188912-78591601	0.199623	0.000327667	9.88309	0.000408384	0.0107994
ENSRNOT00000086194	Hmg20b-202	ENSRNOG00000020601	Hmg20b	7:11238644-11243305	11.0142	0.158276	6.89911	0.000412642	0.0109012
ENSRNOT00000022196	Edf1-201	ENSRNOG00000016272	Edf1	3:2781169-2785474	56.2642	0.445481	7.78945	0.000413725	0.0109236
TCONS_00072172	TCONS_00072172	XLOC_053971	XLOC_053971	11:67932838-68009960	2.79959	0.0222357	7.80471	0.000413899	0.0109236
ENSRNOT00000083093	Tom1l2-202	ENSRNOG00000003590	Tom1l2	10:46602231-46720907	86.7505	30.8925	2.29399	0.00041492	0.0109344
ENSRNOT00000073638	Tmem178b-201	ENSRNOG00000047635	Tmem178b	4:68011932-68059249	0.263108	5.95357	-3.69533	0.000415987	0.0109571
ENSRNOT00000082697	Plekhb1-202	ENSRNOG00000018627	Plekhb1	1:165665909-165680206	0.006109	6.78502	-9.1469	0.000417559	0.0109823
ENSRNOT00000010247	Frzb-201	ENSRNOG00000007765	Frzb	3:67635607-67668772	0.30439	7.75291	-3.88229	0.000418587	0.0109939
ENSRNOT00000056030	Nell1-201	ENSRNOG00000015675	Nell1	1:105349069-106218958	17.9913	6.40452	2.29511	0.000418749	0.0109939
ENSRNOT00000039850	Bcl2a1-201	ENSRNOG00000047606	Bcl2a1	8:96551245-96559483	0	0.78568	-11.1849	0.000419845	0.011015
ENSRNOT00000012617	Abl1-201	ENSRNOG00000009371	Abl1	3:9410661-9448167	21.3074	5.43257	2.77707	0.000420035	0.011015
ENSRNOT00000077912	Rdh16-203	ENSRNOG00000029651	Rdh16	7:70980422-71072072	0.177955	0	13.3746	0.000421102	0.0110321
ENSRNOT00000059530	Col26a1-201	ENSRNOG00000001422	Col26a1	12:22835019-22979336	0.0752387	7.82589	-5.86018	0.000424947	0.011122
ENSRNOT00000064716	Rps6ka5-201	ENSRNOG00000004362	Rps6ka5	6:124557913-124735741	2.88173	0.342294	3.87841	0.000428802	0.0112009
ENSRNOT00000035446	Fgf5-201	ENSRNOG00000022631	Fgf5	14:12974921-12995584	0.174853	0	11.1623	0.000432274	0.0112574
ENSRNOT00000042307	Eml4-201	ENSRNOG00000030294	Eml4	6:6619076-6674529	0.00323	2.24153	-8.54163	0.000432283	0.0112574
ENSRNOT00000009743	Slx4ip-201	ENSRNOG00000007430	Slx4ip	3:129885826-130065752	0.0866407	0	13.3017	0.000432347	0.0112574
ENSRNOT00000006460	Galnt16-201	ENSRNOG00000004589	Galnt16	6:104068547-104250174	10.1865	86.807	-2.28556	0.000432937	0.011265
ENSRNOT00000089265	Atp7b-202	ENSRNOG00000012878	Atp7b	16:74886719-74945286	0.0617557	0	11.1627	0.000433162	0.0112654
ENSRNOT00000089346	Rbfox3-202	ENSRNOG00000003386	Rbfox3	10:107516995-107539658	0	0.298292	-11.2671	0.000435032	0.0112975
ENSRNOT00000021178	Stxbp1-201	ENSRNOG00000015420	Stxbp1	3:11823785-11885417	11.3335	2.89051	2.78173	0.000436244	0.011318
ENSRNOT00000008940	Rcc2-201	ENSRNOG00000006327	Rcc2	5:159220979-159234320	102.105	30.4873	2.54956	0.000436462	0.0113182
ENSRNOT00000064385	Spice1-201	ENSRNOG00000039024	Spice1	11:61251908-61294022	0.418458	0	13.3793	0.000438365	0.011354
ENSRNOT00000068389	Crispld2-201	ENSRNOG00000016752	Crispld2	19:52647070-52705131	5.00762	0.935139	3.22733	0.000440037	0.0113826
ENSRNOT00000048262	Bin2-201	ENSRNOG00000031930	Bin2	7:142273833-142300382	0	0.231028	-11.1188	0.000440199	0.0113826
ENSRNOT00000006196	Itln1-201	ENSRNOG00000004678	Itln1	13:89919667-89929770	0	0.629287	-11.153	0.000441954	0.0114053
ENSRNOT00000017966	Wwc2-201	ENSRNOG00000013248	Wwc2	16:47368768-47533816	31.1727	9.99856	2.44471	0.00044707	0.0115096
ENSRNOT00000022476	Dscaml1-201	ENSRNOG00000016502	Dscaml1	8:49737798-50055560	0.001728	0.657241	-7.82801	0.000447567	0.0115114
ENSRNOT00000027860	Htra1-201	ENSRNOG00000020533	Htra1	1:201499028-201548513	340.849	122.639	2.28153	0.000450663	0.0115743
ENSRNOT00000083769	Pias3-202	ENSRNOG00000021218	Pias3	2:198823366-198836372	0.396098	0.000151	9.99161	0.000450992	0.0115772
ENSRNOT00000014388	Col8a2-201	ENSRNOG00000010841	Col8a2	5:144308611-144335172	131.622	44.9676	2.35473	0.000451978	0.0115895
ENSRNOT00000022593	Chd8-201	ENSRNOG00000025011	Chd8	15:28612932-28672530	0.00461533	3.5183	-8.70922	0.000452416	0.0115915
ENSRNOT00000080188	Nploc4-202	ENSRNOG00000036698	Nploc4	10:109555241-109604899	11.1471	0.00196833	13.1145	0.000453868	0.0116231
ENSRNOT00000079786	Cyp2j10-204	ENSRNOG00000042224	Cyp2j10	5:115067845-115167986	0.039706	0	11.2551	0.000455884	0.0116692
ENSRNOT00000085853	RGD1305455-202	ENSRNOG00000039214	RGD1305455	12:19573893-19582208	0.415487	0	11.0895	0.000457055	0.0116936
ENSRNOT00000026030	Ap3b2-201	ENSRNOG00000019249	Ap3b2	1:143283996-143315633	0.294662	7.48391	-3.8559	0.000458297	0.0117145
TCONS_00072171	TCONS_00072171	XLOC_053971	XLOC_053971	11:67932838-68009960	1.67963	0.00707133	8.75973	0.000459161	0.011725
ENSRNOT00000028431	Capn1-201	ENSRNOG00000020935	Capn1	1:221346066-221370322	18.1983	4.00061	2.99452	0.000459664	0.01173
TCONS_00375331	TCONS_00375331	XLOC_298048	XLOC_298048	8:46228118-46288795	1.55769	0	15.7794	0.000459825	0.01173
ENSRNOT00000023460	Map1b-201	ENSRNOG00000017428	Map1b	2:29675391-29768750	68.2028	24.1163	2.30671	0.000460013	0.01173
ENSRNOT00000014054	Atxn7l1-203	ENSRNOG00000010415	Atxn7l1	6:52631092-52675574	0.855911	0.011149	7.03668	0.000465812	0.0118639
ENSRNOT00000010263	Nap1l5-201	ENSRNOG00000007808	Nap1l5	4:89149317-89151184	0.054787	13.6959	-7.01206	0.000466953	0.0118836
ENSRNOT00000046370	Cadm2-201	ENSRNOG00000030840	Cadm2	11:4175078-4397361	1.10266	11.3396	-2.55458	0.000467296	0.0118836
ENSRNOT00000044161	Camk1g-202	ENSRNOG00000006470	Camk1g	13:112075690-112099336	0	1.21707	-13.3175	0.000467368	0.0118836
ENSRNOT00000089464	Nsmce1-202	ENSRNOG00000015218	Nsmce1	1:196857461-196884302	11.5622	2.29561	3.14475	0.000470307	0.0119413
ENSRNOT00000023911	Ccsap-201	ENSRNOG00000017690	Ccsap	19:56617399-56633633	0.21486	0	11.0884	0.00047132	0.0119557
ENSRNOT00000086143	Ppp2r5c-202	ENSRNOG00000004973	Ppp2r5c	6:134804141-134937032	4.97088	1.04558	3.04685	0.000472428	0.0119724
ENSRNOT00000003170	Gabrb1-201	ENSRNOG00000002327	Gabrb1	14:38643385-39112600	0.00592667	2.25578	-7.84685	0.000472667	0.0119728
ENSRNOT00000017996	Crisp2-201	ENSRNOG00000013225	Crisp2	9:23503236-23527496	0.139533	0	11.0607	0.000476119	0.0120545
ENSRNOT00000073039	Chl1-201	ENSRNOG00000045771	Chl1	4:70252366-70330803	2.15209	23.2426	-2.63675	0.000476436	0.0120569
ENSRNOT00000048485	Havcr2-201	ENSRNOG00000031443	Havcr2	10:31561895-31588943	0	0.227113	-11.1211	0.000478236	0.0120853
ENSRNOT00000077503	Col4a4-205	ENSRNOG00000014851	Col4a4	9:88237089-88356716	0.060751	0	12.1872	0.000480622	0.0121284
ENSRNOT00000027352	Ptpn20-201	ENSRNOG00000020203	Ptpn20	16:9907598-9973516	0	0.0922137	-11.0931	0.000482127	0.0121604
ENSRNOT00000023189	Cdr2-201	ENSRNOG00000017260	Cdr2	1:190889701-190914610	19.4105	4.46903	2.92853	0.000482371	0.0121604
ENSRNOT00000041125	Nol4-201	ENSRNOG00000014775	Nol4	18:13658271-14016713	0.002012	0.786853	-7.73591	0.000482571	0.0121604
ENSRNOT00000043822	Abcb4-203	ENSRNOG00000008012	Abcb4	4:22134805-22192474	8.83539	2.04773	2.91148	0.000485327	0.0122177
ENSRNOT00000032634	Ugt1a1-204	ENSRNOG00000018740	Ugt1a1	9:95241609-95302822	0.281594	10.3014	-4.40489	0.000485532	0.0122177
ENSRNOT00000046490	Tp53-201	ENSRNOG00000010756	Tp53	10:56187020-56198448	41.2868	8.97196	3.00363	0.000486772	0.0122432
ENSRNOT00000083438	Bbx-202	ENSRNOG00000001971	Bbx	11:53140599-53228716	4.74451	0.13166	5.98213	0.000487172	0.0122475
ENSRNOT00000072220	Fam240b-201	ENSRNOG00000050209	Fam240b	17:1994172-1999596	0.620458	0	11.0608	0.000488995	0.0122664
ENSRNOT00000073506	Ncmap-201	ENSRNOG00000048139	Ncmap	5:153729250-153737161	0.421403	0	11.0478	0.000489059	0.0122664
ENSRNOT00000046842	AABR07024769.1-201	ENSRNOG00000033894	AABR07024769.1	16:15764632-15798974	0	0.201163	-11.265	0.000489069	0.0122664
ENSRNOT00000059627	Ptpn3-201	ENSRNOG00000011425	Ptpn3	5:74250453-74368186	0.146847	0	13.4172	0.000491533	0.0123166
ENSRNOT00000004147	Myh3-201	ENSRNOG00000046276	Myh3	10:53621375-53645194	0.140071	0	11.0336	0.000494738	0.0123868
ENSRNOT00000059468	Timd2-201	ENSRNOG00000021345	Timd2	10:31755510-31790263	0	0.187321	-11.1986	0.00049581	0.0124006
ENSRNOT00000087508	Tagln3-201	ENSRNOG00000059539	Tagln3	11:60073383-60086552	0.648691	17.2693	-3.92184	0.0004962	0.012401
ENSRNOT00000088026	Cdh4-201	ENSRNOG00000052405	Cdh4	3:175144495-175279761	0.032785	3.56645	-6.02371	0.000496803	0.012408
ENSRNOT00000028278	Cspg5-201	ENSRNOG00000020833	Cspg5	8:118333706-118347582	1.06133	22.1189	-3.57639	0.000497404	0.0124114
ENSRNOT00000088097	Gorasp2-201	ENSRNOG00000055853	Gorasp2	3:56966654-56995369	54.0797	16.2133	2.55131	0.000501558	0.0124976
ENSRNOT00000040576	Ptpro-201	ENSRNOG00000006231	Ptpro	4:171250818-171461677	0.512732	6.04288	-2.74697	0.000503534	0.0125185
ENSRNOT00000024253	Mfge8-201	ENSRNOG00000017510	Mfge8	1:140845479-140860882	219.566	75.6318	2.34585	0.000503665	0.0125185
ENSRNOT00000093629	Ntan1-201	ENSRNOG00000051382	Ntan1	10:3218466-3234985	1.59491	0.0230523	6.81679	0.000506415	0.0125528
ENSRNOT00000003191	Gabra4-201	ENSRNOG00000002336	Gabra4	14:39154529-39231695	0.0385147	1.60519	-4.57531	0.000509446	0.0126013
ENSRNOT00000000352	Cd24-201	ENSRNOG00000000321	Cd24	20:48335540-48340846	34.954	367.64	-2.59279	0.000509484	0.0126013
ENSRNOT00000085915	Sema3f-202	ENSRNOG00000017704	Sema3f	8:116437696-116465801	21.0855	5.29722	2.79911	0.000514218	0.0126949
ENSRNOT00000039538	Meis3-201	ENSRNOG00000021390	Meis3	1:78068931-78079689	5.85997	0.345651	4.89964	0.000515844	0.0127233
ENSRNOT00000023519	Nrsn1-201	ENSRNOG00000017444	Nrsn1	17:41798783-41817101	0	0.388226	-11.3388	0.000519184	0.012788
ENSRNOT00000041495	Rnase4-201	ENSRNOG00000025625	Rnase4	15:28018040-28035389	46.1646	12.0111	2.75066	0.000519727	0.0127896
ENSRNOT00000002576	Prodh1-201	ENSRNOG00000000281	Prodh1	11:87058616-87075785	0.212991	7.94657	-4.41871	0.00052069	0.0127988
ENSRNOT00000080758	Arhgap24-201	ENSRNOG00000056944	Arhgap24	14:8383237-8510138	0.755969	0.0161327	6.32015	0.000520746	0.0127988
ENSRNOT00000093349	Nrk-202	ENSRNOG00000008880	Nrk	X:109996163-110005708	0.373683	0	11.1353	0.000522663	0.0128265
ENSRNOT00000087625	Mapk3-201	ENSRNOG00000053583	Mapk3	1:198192773-198198975	102.678	25.7534	2.7996	0.000522958	0.0128278
ENSRNOT00000009627	Acss1-201	ENSRNOG00000007102	Acss1	3:146420346-146470293	3.04946	33.0588	-2.63104	0.00052423	0.0128435
ENSRNOT00000073535	Tlr8-201	ENSRNOG00000045992	Tlr8	X:28539158-28562803	0	0.245749	-11.0303	0.000524338	0.0128435
ENSRNOT00000064536	Dysf-201	ENSRNOG00000032788	Dysf	4:115713004-115901873	2.33106	0.443894	3.18476	0.000524556	0.0128435
ENSRNOT00000014207	Cand2-201	ENSRNOG00000010473	Cand2	4:147692028-147714585	0.005572	2.28251	-7.7595	0.000525401	0.0128583
ENSRNOT00000076408	Mef2c-206	ENSRNOG00000033134	Mef2c	2:11658568-11818308	0.0894433	0	13.172	0.000528617	0.0129187
ENSRNOT00000045867	Ccl6-201	ENSRNOG00000030021	Ccl6	10:70797124-70802782	0	1.2026	-11.2639	0.000529967	0.0129404
ENSRNOT00000083256	Aff3-202	ENSRNOG00000018830	Aff3	9:44839960-45292047	6.79895	2.26944	2.38161	0.00053225	0.0129847
ENSRNOT00000002895	Ncam2-201	ENSRNOG00000002126	Ncam2	11:20474483-20705063	0.220444	3.08258	-3.00578	0.000537837	0.0130908
ENSRNOT00000085784	Lman1-202	ENSRNOG00000024470	Lman1	18:61686401-61707307	21.1713	4.75491	2.9584	0.000540403	0.0131473
ENSRNOT00000087711	Slc4a10-207	ENSRNOG00000005307	Slc4a10	3:48082935-48286058	0	0.805242	-15.8134	0.000542077	0.01317
ENSRNOT00000068452	Zfpm1-201	ENSRNOG00000043077	Zfpm1	19:55094585-55150686	7.42991	1.63812	2.98332	0.000542562	0.0131713
TCONS_00324944	TCONS_00324944	XLOC_258016	XLOC_258016	6:145387883-145439340	0	0.515417	-13.2464	0.000544752	0.013217
ENSRNOT00000064426	Lin52-201	ENSRNOG00000043441	Lin52	6:108167716-108178508	0.569064	27.3723	-4.77944	0.000545377	0.0132238
ENSRNOT00000003890	Ccdc103-201	ENSRNOG00000002905	Ccdc103	10:90984227-90987627	0	1.69215	-11.0096	0.000545536	0.0132238
ENSRNOT00000086223	Fcgr3a-202	ENSRNOG00000024382	Fcgr3a	13:89386023-89396043	0	2.65181	-13.2351	0.000545905	0.0132238
ENSRNOT00000004947	Mrpl27-201	ENSRNOG00000003724	Mrpl27	10:82375572-82381332	33.3564	0.290747	7.67532	0.000548274	0.0132724
ENSRNOT00000010609	Elfn2-201	ENSRNOG00000007934	Elfn2	7:119894066-119896925	0	1.98575	-10.9986	0.000550671	0.0133084
ENSRNOT00000004958	AABR07041600.1-201	ENSRNOG00000003734	AABR07041600.1	X:134539398-134541531	0	2.66646	-11.0078	0.00055253	0.0133452
ENSRNOT00000076336	Slc7a3-201	ENSRNOG00000004133	Slc7a3	X:70972779-70978714	0.557836	0	11.0304	0.000558375	0.0134682
ENSRNOT00000072793	LOC682102-201	ENSRNOG00000048129	LOC682102	5:146023696-146069670	0.072337	0	11.0411	0.000558784	0.013472
ENSRNOT00000014270	Depdc1b-201	ENSRNOG00000010701	Depdc1b	2:40000313-40069975	0.789679	10.7572	-2.95817	0.000559308	0.0134785
ENSRNOT00000087247	AABR07015081.2-201	ENSRNOG00000054945	AABR07015081.2	14:46653040-46657975	0.632575	0	10.954	0.000561417	0.0135164
ENSRNOT00000046886	Dazap1-201	ENSRNOG00000031387	Dazap1	7:12290402-12311149	25.9629	5.62612	3.00295	0.000561559	0.0135164
ENSRNOT00000006055	Clec3b-201	ENSRNOG00000004540	Clec3b	8:132241134-132246694	27.5778	3.84291	3.65019	0.000564519	0.0135797
ENSRNOT00000018990	Nox4-201	ENSRNOG00000013925	Nox4	1:150797084-150976194	4.0913	1.06614	2.73602	0.000565449	0.0135959
ENSRNOT00000024458	Cd83-201	ENSRNOG00000018092	Cd83	17:24416651-24435790	0.019371	4.12721	-6.83763	0.000567764	0.0136412
ENSRNOT00000091312	Tmem156-202	ENSRNOG00000026518	Tmem156	14:44889287-44918343	0	0.236669	-11.2792	0.000568537	0.0136518
ENSRNOT00000080632	RGD1307100-205	ENSRNOG00000038436	RGD1307100	2:123617794-123631618	0.228128	0	10.9686	0.000573192	0.0137512
ENSRNOT00000081497	Spats2l-202	ENSRNOG00000016012	Spats2l	9:64643281-64843928	15.3202	4.34711	2.62524	0.000578084	0.0138438
ENSRNOT00000059680	Cfap44-201	ENSRNOG00000028077	Cfap44	11:61162628-61234944	0.00876433	0.755157	-5.59727	0.0005799	0.0138748
ENSRNOT00000081531	Arhgef2-202	ENSRNOG00000020027	Arhgef2	2:187977008-188020424	0.0780597	0	11.0669	0.000582026	0.0139079
ENSRNOT00000079456	Ahnak-201	ENSRNOG00000057569	Ahnak	1:225184939-225215015	23.0168	6.10923	2.7209	0.000582975	0.013922
ENSRNOT00000021285	Prkcz-201	ENSRNOG00000015480	Prkcz	5:172658748-172769421	0.432115	6.19894	-3.02454	0.000584181	0.0139272
ENSRNOT00000008573	Plekhg3-201	ENSRNOG00000006570	Plekhg3	6:99625306-99655362	10.2311	2.08286	3.09088	0.00058622	0.0139636
ENSRNOT00000005746	Timp3-201	ENSRNOG00000004303	Timp3	7:23544215-23594133	225.825	84.0226	2.22782	0.000586515	0.0139644
ENSRNOT00000018794	Rasgrf1-201	ENSRNOG00000014025	Rasgrf1	8:97291580-97405102	0.127087	0	13.1391	0.00058765	0.013979
ENSRNOT00000034970	Cndp1-201	ENSRNOG00000027739	Cndp1	18:81466716-81499051	0.0357887	2.555	-5.32483	0.000593418	0.0140912
ENSRNOT00000003511	Sox9-201	ENSRNOG00000002607	Sox9	10:101288489-101293379	171.192	47.4358	2.65621	0.000595448	0.0141331
ENSRNOT00000077071	Col12a1-201	ENSRNOG00000058470	Col12a1	8:87040799-87158368	213.633	80.2529	2.21592	0.000596572	0.0141535
ENSRNOT00000089538	Nf1-202	ENSRNOG00000013780	Nf1	10:66732390-66928903	2.22333	22.2362	-2.50349	0.000602039	0.0142706
ENSRNOT00000031743	Kirrel1-201	ENSRNOG00000016408	Kirrel1	2:186425223-186480278	5.3951	1.11522	3.08009	0.000603357	0.0142891
ENSRNOT00000082209	Lrrc45-202	ENSRNOG00000045926	Lrrc45	10:109894286-109903784	3.50789	0.0502293	6.93588	0.000609538	0.0144164
ENSRNOT00000063873	Tm6sf1-201	ENSRNOG00000019662	Tm6sf1	1:143661521-143703759	0.310798	0	13.0505	0.000612967	0.0144911
TCONS_00063210	TCONS_00063210	XLOC_047209	XLOC_047209	10:66321861-66334604	0	0.432885	-10.9688	0.000613557	0.0144966
ENSRNOT00000019820	Cbfa2t3-201	ENSRNOG00000014723	Cbfa2t3	19:55441572-55510460	0	0.0894023	-11.1029	0.000614608	0.0145107
ENSRNOT00000087709	Stmn4-202	ENSRNOG00000053334	Stmn4	15:43007908-43025852	0	1.36188	-13.1212	0.000615114	0.0145162
ENSRNOT00000087668	Zim1-202	ENSRNOG00000015071	Zim1	1:70253650-70265524	0	0.45245	-10.9289	0.000621478	0.0146451
ENSRNOT00000089578	LOC100909725-202	ENSRNOG00000020598	LOC100909725	1:87167395-87174530	0.419339	0	10.8827	0.000621571	0.0146451
ENSRNOT00000080342	Csnk1g2-202	ENSRNOG00000018529	Csnk1g2	7:11944958-11963268	53.1529	15.3253	2.59633	0.000621795	0.0146451
ENSRNOT00000016400	Slc35d3-201	ENSRNOG00000012311	Slc35d3	1:15298526-15301998	0	1.53906	-10.9099	0.000623593	0.014671
ENSRNOT00000036168	Syt7-203	ENSRNOG00000026432	Syt7	1:226436139-226493179	0	0.437329	-13.1509	0.000624561	0.0146744
ENSRNOT00000072098	Lamb2-201	ENSRNOG00000047768	Lamb2	8:117268337-117280517	67.3418	17.4286	2.744	0.00062619	0.0147063
ENSRNOT00000046288	Cenpi-201	ENSRNOG00000033335	Cenpi	X:105147534-105198797	0.732885	10.7646	-3.08344	0.000628929	0.0147641
ENSRNOT00000088333	Rad51ap1-201	ENSRNOG00000059878	Rad51ap1	4:159469804-159482869	0.298319	0	11.2723	0.000633456	0.0148639
ENSRNOT00000013230	Slco1c1-201	ENSRNOG00000009740	Slco1c1	4:175729726-175776808	0.353057	6.7014	-3.44567	0.000634113	0.0148727
ENSRNOT00000074942	Apoc3-201	ENSRNOG00000047503	Apoc3	8:50529318-50531498	1.3585	0	10.8784	0.000634749	0.0148812
ENSRNOT00000082257	Ncam1-204	ENSRNOG00000031890	Ncam1	8:53839098-53899669	71.5755	7.26021	4.08641	0.000639891	0.0149755
ENSRNOT00000022861	Chd6-201	ENSRNOG00000016744	Chd6	3:156937746-157099306	2.15419	0.0595827	6.0217	0.000641347	0.0149964
ENSRNOT00000009158	Camk1g-201	ENSRNOG00000006470	Camk1g	13:112075690-112099336	0.022145	2.26821	-5.86654	0.000643669	0.015031
ENSRNOT00000033489	Sec31a-202	ENSRNOG00000002251	Sec31a	14:10854752-10909571	43.6789	14.9005	2.36451	0.00064721	0.015094
ENSRNOT00000025797	Pde8a-201	ENSRNOG00000019005	Pde8a	1:143036218-143159433	3.19001	0.676299	3.03768	0.000648208	0.0151107
ENSRNOT00000048043	Cacna2d3-201	ENSRNOG00000031287	Cacna2d3	16:4871650-5795825	0.0438817	0.681106	-3.13623	0.000650639	0.0151434
ENSRNOT00000023623	Slc38a3-201	ENSRNOG00000016827	Slc38a3	8:116406241-116422366	9.10019	97.438	-2.61284	0.000651096	0.0151434
ENSRNOT00000004699	Prkca-201	ENSRNOG00000003491	Prkca	10:96191385-96584896	12.0029	3.92102	2.42624	0.000657756	0.0152601
ENSRNOT00000082850	Slc7a1-202	ENSRNOG00000000924	Slc7a1	12:8032809-8106507	0.908031	0	15.3813	0.000662666	0.0153474
ENSRNOT00000078278	Fnbp4-202	ENSRNOG00000007241	Fnbp4	3:79570625-79609257	0.0212293	1.95367	-5.69444	0.000663745	0.0153591
ENSRNOT00000065354	AABR07056633.1-201	ENSRNOG00000024494	AABR07056633.1	7:33702770-33793565	0.0628433	1.83001	-4.06616	0.000665938	0.0154032
ENSRNOT00000067889	Mfge8-202	ENSRNOG00000017510	Mfge8	1:140845479-140860882	64.1429	1.87023	5.92872	0.000667358	0.0154294
ENSRNOT00000014397	Sap18-201	ENSRNOG00000010732	Sap18	15:38069320-38073622	69.7779	14.4391	3.07449	0.000670803	0.0154889
ENSRNOT00000013390	Polr3d-201	ENSRNOG00000010028	Polr3d	15:52129471-52134140	21.1263	1.56958	4.53073	0.00067776	0.0156159
ENSRNOT00000092976	Arid1b-204	ENSRNOG00000017030	Arid1b	1:45923222-46230523	0.231726	0	15.3709	0.000680083	0.0156411
ENSRNOT00000090654	Kit-202	ENSRNOG00000002227	Kit	14:35072108-35149610	0.055085	1.93326	-4.30387	0.000693999	0.0159284
ENSRNOT00000035310	Sidt2-202	ENSRNOG00000017871	Sidt2	8:50231700-50245838	193.955	66.0106	2.37041	0.000695458	0.0159519
ENSRNOT00000058162	Ednra-201	ENSRNOG00000012721	Ednra	19:33928356-33991703	2.05363	25.541	-2.82873	0.000697181	0.0159672
ENSRNOT00000089199	Tspan9-201	ENSRNOG00000051620	Tspan9	4:160530720-160662974	7.08798	1.41992	3.11519	0.000699315	0.01598
ENSRNOT00000086813	Stk38l-202	ENSRNOG00000001828	Stk38l	4:181055662-181089740	46.6341	15.3178	2.41098	0.000700007	0.01598
ENSRNOT00000017071	Lgals9-202	ENSRNOG00000012681	Lgals9	10:64737022-64760201	0.0238027	2.25068	-5.74945	0.000700133	0.01598
ENSRNOT00000037529	Ctxn3-201	ENSRNOG00000022957	Ctxn3	18:52550739-52551805	12.129	0.183825	6.78932	0.000702743	0.0160191
ENSRNOT00000040808	Tpm1-204	ENSRNOG00000018184	Tpm1	8:72814740-72841496	15.5476	3.57219	2.9219	0.000704517	0.0160527
ENSRNOT00000020729	Sox5-201	ENSRNOG00000027869	Sox5	4:178067051-178168690	0.030899	0	10.9612	0.000705097	0.0160591
ENSRNOT00000011393	Fut9-201	ENSRNOG00000008475	Fut9	5:40032855-40237591	0.195376	2.87076	-3.06855	0.000707171	0.0160995
ENSRNOT00000082799	Sh3pxd2a-202	ENSRNOG00000020353	Sh3pxd2a	1:267046361-267245636	20.5917	7.53618	2.25609	0.000708481	0.0161225
ENSRNOT00000056198	Kdm5a-201	ENSRNOG00000010591	Kdm5a	4:152892388-152925928	0.541599	9.83314	-3.39116	0.000709947	0.016149
ENSRNOT00000059269	Anks1b-201	ENSRNOG00000024870	Anks1b	7:30699476-31681182	2.89253	0.996931	2.34021	0.000712085	0.0161907
ENSRNOT00000021734	Sh3bgrl3-201	ENSRNOG00000015967	Sh3bgrl3	5:152357270-152358643	95.7001	12.3771	3.75164	0.000723903	0.0164198
ENSRNOT00000079053	Zfp9-202	ENSRNOG00000006726	Zfp9	4:150517930-150522351	0.631603	0	10.7969	0.000727489	0.0164849
ENSRNOT00000016112	Mbd2-201	ENSRNOG00000011853	Mbd2	18:65814026-65885114	11.6538	3.08315	2.72192	0.000729332	0.0165092
ENSRNOT00000082907	Alox5-202	ENSRNOG00000012972	Alox5	4:148398892-148437961	0.070786	0	10.7775	0.000730413	0.0165232
ENSRNOT00000011748	Gdap1l1-201	ENSRNOG00000008790	Gdap1l1	3:159823878-159842278	0.114894	5.69343	-4.80841	0.000740773	0.0167293
ENSRNOT00000005983	Crim1-201	ENSRNOG00000004208	Crim1	6:788548-960703	37.0477	13.9903	2.20949	0.000743856	0.0167635
ENSRNOT00000034560	Gpr183-201	ENSRNOG00000025094	Gpr183	15:108364701-108376221	0	0.427775	-10.7912	0.000746145	0.0167869
ENSRNOT00000064261	Zfp385a-201	ENSRNOG00000036833	Zfp385a	7:144939623-144959746	3.32426	0	15.2807	0.000747532	0.0167898
ENSRNOT00000023140	Atxn1-201	ENSRNOG00000016998	Atxn1	17:19249952-19533814	18.9915	7.10711	2.22287	0.000749124	0.0168185
ENSRNOT00000087534	Rab6a-202	ENSRNOG00000018176	Rab6a	1:165625350-165662089	19.6047	5.16034	2.72664	0.000753209	0.0168961
ENSRNOT00000056024	Svip-201	ENSRNOG00000037137	Svip	1:107368117-107373807	0.48981	0	10.7765	0.00075788	0.0169725
ENSRNOT00000057897	Csmd1-201	ENSRNOG00000030719	Csmd1	16:78539489-78850222	0.167231	2.22527	-2.92025	0.000757886	0.0169725
ENSRNOT00000029443	Slc15a3-201	ENSRNOG00000021644	Slc15a3	1:226897625-226912708	0	0.371259	-10.9735	0.00075873	0.0169778
ENSRNOT00000081007	Arhgef12-202	ENSRNOG00000008924	Arhgef12	8:47259404-47339343	0.0278753	7.30418	-7.22049	0.00075895	0.0169778
ENSRNOT00000058727	Nrg1-205	ENSRNOG00000010392	Nrg1	16:63880428-64057434	10.0458	3.34013	2.3894	0.000759193	0.0169778
ENSRNOT00000025424	AC109048.1-201	ENSRNOG00000018801	AC109048.1	19:54620885-54648227	12.5277	2.83157	2.95451	0.000762356	0.0170299
ENSRNOT00000072580	Ecscr-201	ENSRNOG00000039593	Ecscr	18:28506934-28516209	0.364663	0	11.0569	0.00076817	0.017124
ENSRNOT00000077375	Kirrel1-202	ENSRNOG00000016408	Kirrel1	2:186420795-186515135	60.4461	22.8514	2.21171	0.000775217	0.0172452
ENSRNOT00000086164	Kcnip2-204	ENSRNOG00000050450	Kcnip2	1:265549593-265573409	0	0.900153	-12.9213	0.000778388	0.0173085
ENSRNOT00000019862	Iars-201	ENSRNOG00000014616	Iars	17:15356016-15402631	3.12173	0.371995	3.9079	0.000785201	0.0174227
ENSRNOT00000002116	Atp5pf-201	ENSRNOG00000001551	Atp5pf	11:24286787-24294179	9.16054	0.066539	7.86826	0.000787701	0.0174435
ENSRNOT00000031117	Tmem184b-201	ENSRNOG00000022802	Tmem184b	7:120593336-120636592	47.8639	10.7074	2.97192	0.000787836	0.0174435
ENSRNOT00000025157	Hbegf-201	ENSRNOG00000018646	Hbegf	18:29329764-29340403	95.8885	29.4823	2.50528	0.000788041	0.0174435
ENSRNOT00000075517	Snrpd3-201	ENSRNOG00000050410	Snrpd3	20:14080565-14095181	34.7426	8.6498	2.81301	0.000797674	0.0176348
ENSRNOT00000003891	Sept9-201	ENSRNOG00000002807	2021-09-09	10:106264434-106348490	80.8275	30.6945	2.20166	0.00080129	0.0176856
ENSRNOT00000009354	Ilf3-201	ENSRNOG00000022741	Ilf3	8:22423890-22440410	1.04343	0.00422	8.55118	0.000806395	0.0177689
ENSRNOT00000007374	Hpcal1-201	ENSRNOG00000005492	Hpcal1	6:43001948-43109071	9.10513	2.65923	2.57607	0.000810274	0.017847
ENSRNOT00000073721	Clec18a-202	ENSRNOG00000022721	Clec18a	19:43163129-43175624	0	0.401892	-10.81	0.000811267	0.0178542
ENSRNOT00000007412	Ntn4-201	ENSRNOG00000005573	Ntn4	7:34533543-34649338	2.99494	0.559923	3.2144	0.000812504	0.0178741
ENSRNOT00000020414	Bard1-201	ENSRNOG00000014960	Bard1	9:78297871-78368777	0.786494	10.8073	-2.99736	0.000815601	0.0179275
ENSRNOT00000013496	Ldlr-201	ENSRNOG00000009946	Ldlr	8:22750336-22774903	54.7223	18.1062	2.40044	0.000817641	0.0179576
ENSRNOT00000024765	Caly-201	ENSRNOG00000018337	Caly	1:212537848-212549477	0	0.429368	-10.8212	0.000819014	0.0179803
ENSRNOT00000010118	Akap9-201	ENSRNOG00000026319	Akap9	4:27195346-27331582	0.092804	1.95291	-3.59216	0.0008217	0.0180319
ENSRNOT00000092819	Arhgef2-204	ENSRNOG00000020027	Arhgef2	2:187990242-188005855	0.16672	0	10.6849	0.000825712	0.0181125
ENSRNOT00000026567	Lsm4-201	ENSRNOG00000019572	Lsm4	16:20506399-20511818	18.4145	0.164564	7.56966	0.000827048	0.0181344
ENSRNOT00000016193	Slc18a1-201	ENSRNOG00000011992	Slc18a1	16:22361998-22395183	0	0.138307	-10.6909	0.000830406	0.0181973
ENSRNOT00000003447	Galnt10-201	ENSRNOG00000002488	Galnt10	10:43067299-43210427	39.8508	14.8848	2.23085	0.000830721	0.0181973
ENSRNOT00000042827	Sh3bgrl-201	ENSRNOG00000002280	Sh3bgrl	X:80213332-80309936	72.1213	27.7781	2.18283	0.000830937	0.0181973
ENSRNOT00000019222	Gfra2-201	ENSRNOG00000014010	Gfra2	15:52557607-52648972	0.0497763	1.58165	-4.18363	0.00083277	0.0182225
ENSRNOT00000001185	Caln1-201	ENSRNOG00000000886	Caln1	12:29308341-29743705	0.0851057	1.26103	-3.0823	0.000833223	0.018225
ENSRNOT00000000783	Cdk1-201	ENSRNOG00000000632	Cdk1	20:20576377-20591509	4.7645	72.4442	-3.13642	0.00083865	0.0183362
ENSRNOT00000072526	Lin7a-202	ENSRNOG00000004527	Lin7a	7:49429613-49656856	0.0662823	0	13.1391	0.000845907	0.0184723
ENSRNOT00000013538	Lgals1-201	ENSRNOG00000009884	Lgals1	7:120153184-120156289	889.555	317.169	2.29031	0.000848477	0.0185133
ENSRNOT00000000072	Atp5me-201	ENSRNOG00000000064	Atp5me	14:2325308-2326436	40.6544	2.39806	4.8814	0.000849015	0.0185174
ENSRNOT00000022214	Vasp-201	ENSRNOG00000016367	Vasp	1:80170619-80185882	67.9061	21.246	2.48355	0.000855423	0.0186268
ENSRNOT00000074081	U2af1-201	ENSRNOG00000045860	U2af1	20:10396621-10407554	12.8107	1.81017	3.63316	0.000857247	0.018659
ENSRNOT00000088662	Ctif-202	ENSRNOG00000018342	Ctif	18:71463486-71829881	7.11561	2.60131	2.25846	0.000861335	0.0187175
ENSRNOT00000078586	Pde7b-202	ENSRNOG00000013436	Pde7b	1:15893533-16203909	0.903675	8.53331	-2.43255	0.000864964	0.0187702
ENSRNOT00000007554	Vapb-201	ENSRNOG00000005331	Vapb	3:171832500-171868647	44.6826	14.619	2.41361	0.000866401	0.0187818
ENSRNOT00000001129	Bag6-201	ENSRNOG00000000851	Bag6	20:5125411-5138084	34.5962	6.22328	3.29962	0.000867347	0.0187947
ENSRNOT00000051394	Mef2d-201	ENSRNOG00000031778	Mef2d	2:187512164-187538026	24.4809	6.85639	2.64077	0.000867743	0.0187957
ENSRNOT00000014603	Mthfd2-201	ENSRNOG00000010833	Mthfd2	4:115004448-115015965	34.7947	8.38619	2.8584	0.000869576	0.0188278
ENSRNOT00000001539	Srsf9-201	ENSRNOG00000001163	Srsf9	12:47039716-47046022	30.7228	4.22356	3.65684	0.000874044	0.018894
ENSRNOT00000065642	Tll1-201	ENSRNOG00000033528	Tll1	16:27399467-27597240	7.5833	2.54373	2.38634	0.000875848	0.0189194
ENSRNOT00000015651	Spag5-201	ENSRNOG00000011777	Spag5	10:65566171-65585760	1.97504	0.027359	6.99945	0.000875927	0.0189194
ENSRNOT00000045275	Cbs-202	ENSRNOG00000029528	Cbs	20:10361988-10386663	0.021174	2.36744	-5.96399	0.000877218	0.0189396
ENSRNOT00000059162	Nars-202	ENSRNOG00000017852	Nars	18:59986360-60002569	0.234522	0.000138	9.56833	0.000880415	0.0189857
ENSRNOT00000036193	Tp63-203	ENSRNOG00000001924	Tp63	11:78234800-78456501	0.469394	0.004241	7.5582	0.000883155	0.0190218
ENSRNOT00000076895	Ebna1bp2-202	ENSRNOG00000050287	Ebna1bp2	5:137458822-137463255	3.50907	0.018185	8.26558	0.000885381	0.019062
ENSRNOT00000028627	Kdelr1-201	ENSRNOG00000021082	Kdelr1	1:101859346-101870232	262.631	96.2479	2.25307	0.000885859	0.0190647
ENSRNOT00000064507	Lhx2-202	ENSRNOG00000010551	Lhx2	3:22640545-22658446	5.58222	60.7771	-2.64241	0.000886498	0.0190708
ENSRNOT00000022646	Zfp346-201	ENSRNOG00000016867	Zfp346	17:10021420-10061772	0.961796	0.00650967	7.95693	0.000896419	0.0192582
ENSRNOT00000017867	Arhgap10-201	ENSRNOG00000013152	Arhgap10	19:34139997-34402436	4.3564	1.34013	2.50482	0.000898281	0.0192855
ENSRNOT00000041715	Stxbp5l-201	ENSRNOG00000002496	Stxbp5l	11:66316606-66566331	0.896746	0.141008	3.47552	0.000905454	0.0194083
ENSRNOT00000077429	Zdhhc21-202	ENSRNOG00000010484	Zdhhc21	5:100924622-100977902	0.047828	0	10.6382	0.000907023	0.0194264
ENSRNOT00000017060	C1qb-201	ENSRNOG00000012749	C1qb	5:155246447-155252003	0.03739	15.6816	-7.82344	0.000908333	0.0194398
ENSRNOT00000064090	Borcs8-201	ENSRNOG00000020427	Borcs8	16:21023996-21029134	12.3681	0.359006	5.92009	0.000918552	0.0196184
ENSRNOT00000001644	Pofut2-201	ENSRNOG00000001228	Pofut2	20:12117811-12128747	84.367	25.9708	2.5071	0.000919593	0.0196328
ENSRNOT00000007747	Lyz2-201	ENSRNOG00000005825	Lyz2	7:60335969-60341264	0.0538643	12.5158	-7.04992	0.000923875	0.0196995
ENSRNOT00000022905	Plppr5-201	ENSRNOG00000016878	Plppr5	2:219896765-220101791	0.359533	4.32983	-2.78299	0.000924376	0.0196995
ENSRNOT00000024900	Pde4dip-201	ENSRNOG00000018220	Pde4dip	2:199868943-200003443	1.84396	0.276895	3.53023	0.000924559	0.0196995
ENSRNOT00000002869	Rasl11b-201	ENSRNOG00000002097	Rasl11b	14:36550340-36554580	91.1379	22.1009	2.848	0.00092617	0.0197239
ENSRNOT00000084766	Lmod1-201	ENSRNOG00000051548	Lmod1	13:52147555-52190228	17.8138	5.22326	2.58064	0.000927568	0.01974
ENSRNOT00000088895	Atn1-201	ENSRNOG00000060594	Atn1	4:157267901-157274755	13.8866	1.58497	3.94515	0.000930766	0.0198002
ENSRNOT00000000253	Zfp207-201	ENSRNOG00000000236	Zfp207	10:67762995-67774787	28.9616	1.06113	5.5753	0.000940412	0.0199499
ENSRNOT00000003189	Slc15a2-201	ENSRNOG00000002305	Slc15a2	11:66932614-66961713	4.1517	43.3075	-2.57989	0.000943235	0.0199781
ENSRNOT00000076618	Slfn13-204	ENSRNOG00000021412	Slfn13	10:70326157-70339578	0.00306367	4.09923	-9.15444	0.000945134	0.0200104
ENSRNOT00000039836	Psmd3-201	ENSRNOG00000028103	Psmd3	10:86599220-86611188	58.273	16.9065	2.59071	0.000948998	0.0200684
ENSRNOT00000082611	Ntrk2-202	ENSRNOG00000018839	Ntrk2	17:5933729-6244676	0.061131	1.17699	-3.43686	0.000949807	0.0200742
ENSRNOT00000012473	Tacr3-201	ENSRNOG00000009372	Tacr3	2:240021152-240118971	1.83945	0.27962	3.52455	0.000952901	0.0201112
ENSRNOT00000047223	Klhl2-201	ENSRNOG00000029441	Klhl2	16:26739389-26852179	21.4977	7.90012	2.24687	0.000955065	0.020149
ENSRNOT00000004756	Apoh-201	ENSRNOG00000003566	Apoh	10:96639924-96653938	0.188591	0	10.6759	0.000958386	0.0201866
ENSRNOT00000012263	Gpbp1l1-201	ENSRNOG00000037595	Gpbp1l1	5:135413275-135438869	0.0745483	3.78098	-4.87337	0.000968765	0.0203818
ENSRNOT00000085914	Suz12-202	ENSRNOG00000058663	Suz12	10:67325347-67369668	0.271093	0	12.8244	0.000972137	0.0204323
ENSRNOT00000041839	Ntrk3-202	ENSRNOG00000018674	Ntrk3	1:139890560-140262503	0.0545427	1.74648	-4.24398	0.000976981	0.0204982
ENSRNOT00000081441	Hdgfl2-202	ENSRNOG00000049142	Hdgfl2	9:10972804-10991927	3.14594	0.0726633	6.22322	0.000977375	0.0204985
ENSRNOT00000039876	Mx1-201	ENSRNOG00000001959	Mx1	11:37891156-37914983	0.0531007	3.06114	-5.0435	0.000977828	0.0204992
ENSRNOT00000087886	Mbtps1-202	ENSRNOG00000015173	Mbtps1	19:52146808-52206310	11.0039	2.06371	3.23285	0.000983436	0.0206014
TCONS_00097798	TCONS_00097798	XLOC_073901	XLOC_073901	13:19211854-19215024	0.812348	0	10.6592	0.000985345	0.020627
ENSRNOT00000010367	Gria3-201	ENSRNOG00000007682	Gria3	X:127562660-127829753	7.91887	2.82825	2.28105	0.000985705	0.020627
ENSRNOT00000022256	Pclaf-201	ENSRNOG00000016561	Pclaf	8:71514281-71526182	5.10948	63.8486	-2.83795	0.000987325	0.0206505
ENSRNOT00000002215	Dscam-201	ENSRNOG00000027992	Dscam	11:37004902-37253776	0.0165123	1.46687	-5.62797	0.000989588	0.0206736
ENSRNOT00000026748	Itgad-201	ENSRNOG00000019728	Itgad	1:199495427-199545292	0.00326767	1.45248	-8.03423	0.000995834	0.0207754
ENSRNOT00000091560	Actn1-203	ENSRNOG00000056756	Actn1	6:103375799-103470427	21.4347	1.3125	4.87263	0.000996014	0.0207754
ENSRNOT00000071694	Smim5-201	ENSRNOG00000049642	Smim5	10:104451222-104457001	0.459499	0	10.6909	0.000997666	0.0208017
ENSRNOT00000082989	Smurf1-202	ENSRNOG00000000999	Smurf1	12:11407213-11526465	13.4754	3.67507	2.67089	0.000999597	0.0208339
ENSRNOT00000077697	Tmem255a-202	ENSRNOG00000028085	Tmem255a	X:124328735-124465110	0.014601	1.49347	-5.82818	0.00100175	0.0208705
ENSRNOT00000022367	LOC687679-201	ENSRNOG00000016507	LOC687679	4:118167294-118174842	60.9985	10.178	3.36843	0.0010042	0.0209054
ENSRNOT00000087838	Aoah-201	ENSRNOG00000054964	Aoah	17:45872414-46115004	0	0.0797873	-12.7903	0.00100538	0.0209219
ENSRNOT00000048378	Ighm-203	ENSRNOG00000034190	Ighm	6:138237174-138250089	0.181632	0	10.5381	0.00100615	0.0209297
ENSRNOT00000079234	Cnnm4-202	ENSRNOG00000015886	Cnnm4	9:43049638-43088702	0.001026	0.565647	-8.17386	0.00100778	0.0209468
ENSRNOT00000002745	Tmprss11f-201	ENSRNOG00000002005	Tmprss11f	14:23981219-24080470	1.82764	0.0659887	5.58873	0.00101159	0.0209857
ENSRNOT00000064009	Ctnnd1-201	ENSRNOG00000030790	Ctnnd1	3:72002444-72052990	102.026	40.0801	2.15377	0.0010128	0.0210028
TCONS_00118459	TCONS_00118459	XLOC_090374	XLOC_090374	14:95984541-95993843	0	2.00069	-12.7203	0.00101817	0.0211059
ENSRNOT00000026871	Gadd45b-201	ENSRNOG00000019822	Gadd45b	7:11646269-11648322	59.4629	8.30399	3.64858	0.00101977	0.0211309
ENSRNOT00000084490	AABR07044408.1-201	ENSRNOG00000051805	AABR07044408.1	20:4833289-5000045	0.062995	0	12.6504	0.00102063	0.0211405
ENSRNOT00000015680	Fst-201	ENSRNOG00000011631	Fst	2:46538700-46544457	19.6402	2.47112	3.7864	0.00102219	0.0211566
ENSRNOT00000068766	Rgma-201	ENSRNOG00000012874	Rgma	1:134699299-134742514	18.9002	5.6777	2.53651	0.00102608	0.021214
ENSRNOT00000025496	Bcan-201	ENSRNOG00000018798	Bcan	2:187359677-187372652	27.2903	236.385	-2.306	0.00102655	0.021214
ENSRNOT00000021030	Cct7-201	ENSRNOG00000015630	Cct7	4:117235023-117252265	69.6424	23.2703	2.3881	0.00102754	0.0212238
ENSRNOT00000000603	Rpl10a-201	ENSRNOG00000000505	Rpl10a	20:7908304-7910867	461.32	125.645	2.67386	0.00102798	0.0212238
ENSRNOT00000035125	Dact2-201	ENSRNOG00000022921	Dact2	1:56159436-56168351	0	0.4803	-10.6035	0.0010293	0.0212278
ENSRNOT00000065246	Rin3-201	ENSRNOG00000007062	Rin3	6:126170720-126279682	2.76254	0.511828	3.25148	0.00104801	0.0215576
ENSRNOT00000028730	Ctsk-201	ENSRNOG00000021155	Ctsk	2:196655469-196666446	0.943007	20.0848	-3.61066	0.00105229	0.0216289
ENSRNOT00000011773	Actc1-201	ENSRNOG00000008536	Actc1	3:105507403-105512939	62.7258	15.1465	2.85956	0.00105398	0.0216554
ENSRNOT00000067032	Rpl3-201	ENSRNOG00000016896	Rpl3	7:121297355-121302740	452.986	168.423	2.23157	0.00106156	0.0218027
ENSRNOT00000064025	Itpr1-204	ENSRNOG00000007104	Itpr1	4:140247335-140580748	0	0.301546	-15.1114	0.00107027	0.0219319
ENSRNOT00000079785	Emp1-202	ENSRNOG00000008676	Emp1	4:169161585-169179783	75.3439	25.5479	2.3728	0.00107154	0.0219319
ENSRNOT00000022280	Mbp-201	ENSRNOG00000016516	Mbp	18:79406381-79437310	0.0340983	9.34598	-7.26251	0.0010747	0.0219882
ENSRNOT00000018854	Nat1-201	ENSRNOG00000014055	Nat1	16:23970743-23991573	0.544002	0	12.8098	0.00107719	0.0220224
ENSRNOT00000047243	Dync1i2-202	ENSRNOG00000009781	Dync1i2	3:57817693-57868854	0	1.85972	-15.1046	0.00107784	0.0220271
ENSRNOT00000048498	Enox2-201	ENSRNOG00000030622	Enox2	X:135918929-136150209	0	0.411006	-15.1033	0.0010795	0.0220451
ENSRNOT00000068601	Vegfd-201	ENSRNOG00000003587	Vegfd	X:31816436-31851715	1.04574	0.0568383	4.99621	0.00108796	0.0221916
ENSRNOT00000011999	Phlda3-201	ENSRNOG00000009068	Phlda3	13:52588917-52592001	90.395	20.2906	2.9599	0.00109264	0.0222617
ENSRNOT00000064410	Mgat5b-201	ENSRNOG00000024954	Mgat5b	10:105861743-105932042	0.00551967	0.900838	-6.55165	0.00110037	0.0223425
ENSRNOT00000008471	Kitlg-202	ENSRNOG00000005386	Kitlg	7:42269784-42351054	3.64833	0.432865	3.85172	0.00111206	0.0225372
ENSRNOT00000030761	Rpl37a-201	ENSRNOG00000023385	Rpl37a	9:80002045-80005027	72.4159	11.1718	3.48379	0.0011153	0.0225772
ENSRNOT00000003605	Lamc1-201	ENSRNOG00000002680	Lamc1	13:70658707-70783515	91.2397	37.253	2.09873	0.0011206	0.0226584
ENSRNOT00000011307	Synpr-201	ENSRNOG00000008203	Synpr	15:14559471-14737704	5.24713	1.54161	2.56623	0.00112101	0.0226584
ENSRNOT00000086154	Cobl-202	ENSRNOG00000004281	Cobl	14:92342957-92577936	2.3369	0.63586	2.67829	0.00112279	0.022686
ENSRNOT00000084577	Smurf1-203	ENSRNOG00000000999	Smurf1	12:11433819-11523771	11.2171	3.12069	2.66909	0.00113451	0.0228796
ENSRNOT00000023326	Cspg4-201	ENSRNOG00000017208	Cspg4	8:61532465-61567510	31.8197	10.1462	2.45537	0.00113759	0.0229253
ENSRNOT00000004609	Myo1d-201	ENSRNOG00000003276	Myo1d	10:67866940-68142864	13.428	5.21718	2.17018	0.00113863	0.0229253
ENSRNOT00000005006	Tmem163-201	ENSRNOG00000003769	Tmem163	13:44166306-44345735	0.011422	3.12999	-7.27749	0.00113879	0.0229253
ENSRNOT00000087081	Ptpn13-202	ENSRNOG00000002061	Ptpn13	14:7689127-7824209	1.65136	0.282254	3.35026	0.00113902	0.0229253
ENSRNOT00000072398	AABR07015066.1-201	ENSRNOG00000046600	AABR07015066.1	14:46588406-46588816	18.3219	0.103312	7.91046	0.00114103	0.0229506
ENSRNOT00000009563	Bhlhe40-201	ENSRNOG00000007152	Bhlhe40	4:140703619-140709319	59.1594	14.131	2.86534	0.00114333	0.0229723
ENSRNOT00000025362	Pmaip1-201	ENSRNOG00000018770	Pmaip1	18:62174670-62181102	15.5807	1.92656	3.81615	0.0011434	0.0229723
ENSRNOT00000029031	Gria3-202	ENSRNOG00000007682	Gria3	X:127562660-127829753	0.0639327	2.19089	-4.26452	0.00114626	0.0230199
ENSRNOT00000077186	Lilrb4-202	ENSRNOG00000027811	Lilrb4	1:73393850-73399579	0	0.707115	-10.5194	0.00114874	0.0230535
ENSRNOT00000001807	Setd1b-201	ENSRNOG00000001337	Setd1b	12:38845621-38869346	6.064	0.945425	3.48246	0.00114998	0.02307
ENSRNOT00000035048	LOC679539-201	ENSRNOG00000025580	LOC679539	3:164343833-164366684	60.6273	21.274	2.31876	0.00115176	0.0230938
ENSRNOT00000011925	Ets1-201	ENSRNOG00000008941	Ets1	8:33816386-33879625	10.3409	3.06664	2.55993	0.00115233	0.0230938
ENSRNOT00000066041	Mier1-201	ENSRNOG00000007175	Mier1	5:122647281-122693635	1.96039	0.18922	4.1787	0.00115295	0.0230938
ENSRNOT00000022000	Pdlim1-201	ENSRNOG00000016166	Pdlim1	1:259308296-259357056	65.6844	22.648	2.35387	0.00115394	0.0230938
ENSRNOT00000092075	Lims1-202	ENSRNOG00000037765	Lims1	20:27975549-28001990	17.0305	3.98726	2.89975	0.00115419	0.0230938
ENSRNOT00000019180	Map4k4-201	ENSRNOG00000014013	Map4k4	9:46657922-46782545	23.8995	7.26307	2.50568	0.00115463	0.0230938
ENSRNOT00000048488	Galnt6-201	ENSRNOG00000033059	Galnt6	7:142323622-142352382	0	0.166891	-10.7679	0.00115829	0.0231326
ENSRNOT00000005848	Abca5-201	ENSRNOG00000004378	Abca5	10:98576039-98644800	0.00920867	1.9064	-6.83792	0.00115935	0.023145
ENSRNOT00000086982	Slc6a6-202	ENSRNOG00000009019	Slc6a6	4:123642616-123713464	6.46296	1.65135	2.77019	0.00117806	0.0234749
ENSRNOT00000078741	Nfyc-202	ENSRNOG00000010735	Nfyc	5:139688068-139748489	0.00721867	4.61731	-8.55853	0.00117909	0.0234866
ENSRNOT00000013913	Gpx7-201	ENSRNOG00000009751	Gpx7	5:128001761-128009735	48.8999	12.3198	2.79627	0.00117982	0.0234924
ENSRNOT00000058195	Sipa1l1-202	ENSRNOG00000007646	Sipa1l1	6:106084815-106163249	8.27572	1.29972	3.48123	0.00118223	0.023515
ENSRNOT00000022029	Fkbp10-201	ENSRNOG00000015941	Fkbp10	10:88326337-88338199	221.872	84.6819	2.19363	0.00118271	0.023515
ENSRNOT00000006610	Sel1l3-201	ENSRNOG00000004932	Sel1l3	14:60123169-60229734	1.55186	15.2103	-2.48582	0.00119068	0.0236382
ENSRNOT00000077941	Gria2-201	ENSRNOG00000054204	Gria2	2:179584308-179704629	6.91217	0.747172	3.96995	0.00119256	0.0236581
ENSRNOT00000023226	Lama1-201	ENSRNOG00000017237	Lama1	9:115916907-116042123	0.0968603	1.95097	-3.51663	0.0011938	0.0236739
ENSRNOT00000046739	Otud7b-201	ENSRNOG00000042068	Otud7b	2:198231353-198300201	10.0418	2.44592	2.82429	0.00119524	0.0236936
ENSRNOT00000089319	Lrrc75b-202	ENSRNOG00000046428	Lrrc75b	20:14050465-14060264	24.8807	5.47066	2.99315	0.00119589	0.023695
ENSRNOT00000059602	LOC100910838-202	ENSRNOG00000050511	LOC100910838	12:21767606-21773959	4.4402	0.201731	5.24957	0.00119664	0.023695
ENSRNOT00000088111	AABR07015055.1-201	ENSRNOG00000056747	AABR07015055.1	14:46523589-46523999	13.6166	0.0644977	8.11926	0.00120262	0.0237783
TCONS_00003875	TCONS_00003875	XLOC_003176	XLOC_003176	1:50070240-50491440	0	0.209083	-14.993	0.0012046	0.0237911
ENSRNOT00000059271	Togaram1-202	ENSRNOG00000004415	Togaram1	6:86713604-86780147	2.16817	0.223518	4.0362	0.00120673	0.0238156
ENSRNOT00000015318	Ppp2r2a-201	ENSRNOG00000011158	Ppp2r2a	15:43673960-43733182	17.971	5.64765	2.48192	0.0012127	0.023907
TCONS_00037461	TCONS_00037461	XLOC_028774	XLOC_028774	1:189734341-189745484	0	0.33102	-10.3803	0.00121516	0.0239319
ENSRNOT00000015055	Fam167a-201	ENSRNOG00000011316	Fam167a	15:46613810-46643772	0.623446	10.4525	-3.25171	0.00121553	0.0239319
ENSRNOT00000022303	Mbp-202	ENSRNOG00000016516	Mbp	18:79406381-79437310	0.00116267	2.71596	-10.2747	0.00121792	0.0239569
ENSRNOT00000041038	Kcnj5-201	ENSRNOG00000033796	Kcnj5	8:33433905-33463467	0	0.126458	-10.3947	0.00122138	0.0240162
ENSRNOT00000027681	Plpp4-201	ENSRNOG00000020424	Plpp4	1:202432366-202560628	0.557898	7.00053	-2.83475	0.00123335	0.0242248
ENSRNOT00000073205	AABR07005597.1-201	ENSRNOG00000050426	AABR07005597.1	1:189837284-189864944	0	0.147839	-10.5136	0.00123924	0.0243226
ENSRNOT00000056570	Grm7-201	ENSRNOG00000005662	Grm7	4:142780987-143367578	0	0.027671	-12.5297	0.00126001	0.024626
ENSRNOT00000093627	Fubp3-203	ENSRNOG00000009139	Fubp3	3:10222290-10226286	0.547516	0	10.4313	0.00126022	0.024626
ENSRNOT00000080778	Qrich1-202	ENSRNOG00000025071	Qrich1	8:117308469-117346156	20.0022	6.21297	2.4905	0.001264	0.0246867
ENSRNOT00000079889	Flna-201	ENSRNOG00000054890	Flna	X:156463953-156487245	1116.95	468.043	2.06353	0.00126572	0.0246974
ENSRNOT00000038686	Pdzrn4-201	ENSRNOG00000022844	Pdzrn4	7:133856101-134004250	0.0186437	0.721749	-4.45427	0.00127028	0.0247774
ENSRNOT00000027099	Mybphl-201	ENSRNOG00000037082	Mybphl	2:211159062-211173786	0.143083	0	10.3616	0.00127757	0.0248974
ENSRNOT00000092830	Clvs2-201	ENSRNOG00000012122	Clvs2	1:25174456-25296927	0.0743733	0	12.4659	0.00127818	0.0248974
ENSRNOT00000031432	Frrs1l-201	ENSRNOG00000043103	Frrs1l	5:74000227-74029238	0.320129	6.9088	-3.62631	0.00127871	0.0248974
ENSRNOT00000029791	Rps15-201	ENSRNOG00000024603	Rps15	7:12282109-12283608	977.069	340.884	2.32667	0.00127876	0.0248974
ENSRNOT00000092173	Smad2-203	ENSRNOG00000018140	Smad2	18:72550454-72612078	4.07801	0.271867	4.72119	0.00128546	0.0250006
ENSRNOT00000027186	Drgx-201	ENSRNOG00000020045	Drgx	16:8823872-8853430	0.0877267	0	10.7119	0.00129488	0.0251473
ENSRNOT00000001679	Col6a1-201	ENSRNOG00000001249	Col6a1	20:12658065-12675561	79.0178	28.2742	2.29112	0.00130164	0.025251
ENSRNOT00000029456	Eef1d-201	ENSRNOG00000021638	Eef1d	7:116928265-116936674	87.1688	27.14	2.49319	0.00130242	0.0252571
ENSRNOT00000036672	Rbms3-202	ENSRNOG00000025881	Rbms3	8:124840160-125645898	1.98755	0.628017	2.4456	0.00130454	0.0252889
ENSRNOT00000008342	Slc6a11-201	ENSRNOG00000005697	Slc6a11	4:146106386-146223228	0.00532433	1.48368	-7.28444	0.00130867	0.0253324
ENSRNOT00000076079	Dlg3-204	ENSRNOG00000002767	Dlg3	X:70596580-70648532	0.06739	0	11.1546	0.0013108	0.0253644
TCONS_00064272	TCONS_00064272	XLOC_047975	XLOC_047975	10:76968871-77042645	0	0.276811	-12.841	0.00132158	0.0255453
ENSRNOT00000004842	Tnfrsf12a-201	ENSRNOG00000003546	Tnfrsf12a	10:12995904-12997930	165.509	41.4841	2.80556	0.00132425	0.0255692
ENSRNOT00000001577	Tchp-201	ENSRNOG00000001191	Tchp	12:47638274-47653638	3.22584	0.0746043	6.2057	0.00132735	0.0256106
ENSRNOT00000087096	Pou2f1-202	ENSRNOG00000003581	Pou2f1	13:84083632-84217366	0	0.179272	-13.1156	0.00134268	0.025854
ENSRNOT00000001503	Taok3-201	ENSRNOG00000001138	Taok3	12:45037951-45182974	3.11369	0.063249	6.44024	0.00134509	0.0258876
ENSRNOT00000057378	Hdx-202	ENSRNOG00000037799	Hdx	X:82875476-83151511	0.141935	0	14.6499	0.00134705	0.0259159
ENSRNOT00000005077	Nlgn3-201	ENSRNOG00000003812	Nlgn3	X:71199516-71222006	2.49582	0.030859	7.05249	0.00134943	0.0259338
ENSRNOT00000025260	Pck2-201	ENSRNOG00000018536	Pck2	15:34216833-34224193	38.593	9.34916	2.84868	0.00135442	0.0259736
ENSRNOT00000037941	Megf11-201	ENSRNOG00000010634	Megf11	8:69971778-70183986	0.00764133	10.077	-9.49258	0.00135762	0.0260258
ENSRNOT00000076705	Ptpn3-203	ENSRNOG00000011425	Ptpn3	5:74252602-74366817	0.340418	0	14.6389	0.00136115	0.0260691
ENSRNOT00000064116	Ap3s1-201	ENSRNOG00000003829	Ap3s1	18:40732480-40797761	10.4526	2.3596	2.9437	0.00136708	0.026156
ENSRNOT00000016557	Slc1a7-201	ENSRNOG00000011644	Slc1a7	5:127571114-127616033	0.048815	0	10.4396	0.00136735	0.026156
ENSRNOT00000036338	Maml2-201	ENSRNOG00000005879	Maml2	8:12160067-12251099	6.86745	1.95919	2.61188	0.00137362	0.0262385
ENSRNOT00000054958	P4hb-201	ENSRNOG00000036689	P4hb	10:109736458-109747987	795.165	331.991	2.06561	0.00137478	0.0262439
ENSRNOT00000028680	Nomo1-201	ENSRNOG00000021118	Nomo1	1:102017263-102068870	76.5159	30.8992	2.11781	0.00137488	0.0262439
ENSRNOT00000014780	Gars-201	ENSRNOG00000011052	Gars	4:85235172-85276044	73.5759	28.8686	2.15384	0.00137749	0.0262715
ENSRNOT00000077542	Oas2-202	ENSRNOG00000049282	Oas2	12:41340815-41361522	0	0.211923	-10.6551	0.0013778	0.0262715
ENSRNOT00000066132	Mycbpap-201	ENSRNOG00000042912	Mycbpap	10:82232108-82252720	0.437439	0	12.4668	0.0013803	0.0263004
ENSRNOT00000079917	Prex2-202	ENSRNOG00000005391	Prex2	5:7628238-7941822	0.36516	3.92193	-2.63358	0.00138319	0.0263368
ENSRNOT00000087980	Aqp9-201	ENSRNOG00000061883	Aqp9	8:77559624-77599781	0.0179817	4.75053	-7.21271	0.00138382	0.0263393
ENSRNOT00000068440	Cdyl2-201	ENSRNOG00000042888	Cdyl2	19:49093355-49198073	4.0996	1.09278	2.70846	0.00138902	0.0264289
ENSRNOT00000015929	Zfp827-201	ENSRNOG00000011697	Zfp827	19:32401661-32528965	10.3103	3.6949	2.28819	0.0014092	0.0267273
ENSRNOT00000034098	Gpr158-201	ENSRNOG00000024832	Gpr158	17:88215834-88651476	2.61388	19.5125	-2.09538	0.00141442	0.0267696
ENSRNOT00000055272	Pde1b-201	ENSRNOG00000036828	Pde1b	7:145117951-145145376	1.36424	17.4326	-2.86726	0.00141474	0.0267696
ENSRNOT00000083049	Tango2-202	ENSRNOG00000030245	Tango2	11:86797557-86840573	0.189104	0	12.3638	0.00141478	0.0267696
ENSRNOT00000004094	Bst1-201	ENSRNOG00000003064	Bst1	14:71798651-71814523	13.4389	2.7365	3.09636	0.00141622	0.0267846
ENSRNOT00000033733	Rpl31-201	ENSRNOG00000013508	Rpl31	9:46086984-46090997	216.275	66.2083	2.50888	0.00142073	0.0268212
ENSRNOT00000093108	Ccdc170-202	ENSRNOG00000024280	Ccdc170	1:41034308-41126043	0.0132053	0.744926	-4.99368	0.00142086	0.0268212
ENSRNOT00000011580	Emp1-201	ENSRNOG00000008676	Emp1	4:169147243-169181966	86.2956	33.7725	2.15968	0.00142167	0.0268212
ENSRNOT00000040847	Osmr-201	ENSRNOG00000033192	Osmr	2:56110777-56151531	2.36667e-05	2.9558	-13.249	0.00142311	0.0268373
ENSRNOT00000034814	Slf2-201	ENSRNOG00000014482	Slf2	1:264670841-264733306	0.0897413	4.01252	-4.66686	0.00142616	0.0268681
ENSRNOT00000012216	C3ar1-201	ENSRNOG00000009211	C3ar1	4:155684029-155690869	0	0.490631	-10.2504	0.00143262	0.0269708
ENSRNOT00000026783	Cavin1-201	ENSRNOG00000019778	Cavin1	10:88860733-88874528	425.775	175.867	2.08288	0.00143357	0.0269793
ENSRNOT00000007897	Abi3-201	ENSRNOG00000005575	Abi3	10:83644086-83655182	0	0.381922	-10.5774	0.00144147	0.0271089
ENSRNOT00000008153	Jph1-201	ENSRNOG00000006110	Jph1	5:1417478-1511416	0.089002	0	12.3662	0.00144745	0.0271832
ENSRNOT00000083452	Sgk1-204	ENSRNOG00000011815	Sgk1	1:24185435-24302298	0.071915	2.82796	-4.45299	0.00144855	0.0271943
TCONS_00119976	TCONS_00119976	XLOC_091662	XLOC_091662	15:3692623-3750119	0.645157	0	14.5711	0.00145329	0.0272642
ENSRNOT00000008679	Map2k3-201	ENSRNOG00000006612	Map2k3	10:47182433-47203753	0	3.68191	-14.7802	0.00145464	0.0272798
ENSRNOT00000013474	Atxn7l1-201	ENSRNOG00000010415	Atxn7l1	6:52459962-52558412	4.38148	1.09226	2.79744	0.00145949	0.0273517
ENSRNOT00000026753	Resp18-201	ENSRNOG00000019704	Resp18	9:82470794-82477136	1.01426	24.812	-3.81594	0.0014606	0.0273629
ENSRNOT00000092021	Myo1g-201	ENSRNOG00000059140	Myo1g	14:86781202-86796378	0	0.24022	-10.3501	0.00146256	0.0273868
ENSRNOT00000071353	Arl15-202	ENSRNOG00000011105	Arl15	2:45668969-46050564	0.0990363	0	14.557	0.00146457	0.0273989
ENSRNOT00000089226	Samd4a-202	ENSRNOG00000010489	Samd4a	15:23665202-23872143	37.617	15.8324	2.05236	0.00146665	0.0274281
ENSRNOT00000006356	Sec24a-201	ENSRNOG00000004563	Sec24a	10:37140723-37215899	0.025465	0	10.2491	0.00147085	0.0274875
ENSRNOT00000068221	Apol3-201	ENSRNOG00000042771	Apol3	7:118685181-118694015	0	1.68371	-12.4076	0.00147473	0.0275505
ENSRNOT00000011742	Gjb6-201	ENSRNOG00000022116	Gjb6	15:37400889-37409668	0	0.451926	-10.4654	0.00147539	0.0275531
ENSRNOT00000052130	Lexm-201	ENSRNOG00000030914	Lexm	5:126196071-126221916	0.074634	0	10.2675	0.00147911	0.0276021
ENSRNOT00000035485	Cd96-201	ENSRNOG00000023030	Cd96	11:57108956-57183270	0.0255367	0	10.2472	0.00147956	0.0276021
ENSRNOT00000005270	Trir-201	ENSRNOG00000003863	Trir	19:26142720-26146136	47.6296	8.64213	3.26783	0.00148085	0.0276084
ENSRNOT00000084212	Matn3-201	ENSRNOG00000056141	Matn3	6:34071428-34091048	9.22362	1.80906	3.1524	0.00148222	0.0276132
ENSRNOT00000055791	Spen-201	ENSRNOG00000033556	Spen	5:160015454-160070965	6.79402	1.79172	2.72923	0.00148391	0.0276351
ENSRNOT00000027684	Erf-201	ENSRNOG00000020426	Erf	1:82112449-82120902	49.6979	13.4137	2.69475	0.00149148	0.0277324
ENSRNOT00000086473	Creb5-202	ENSRNOG00000008622	Creb5	4:83713666-83834178	0.0737807	0	12.4526	0.00149326	0.0277512
ENSRNOT00000028732	Ctss-201	ENSRNOG00000021157	Ctss	2:197655786-197679458	0.0308507	7.84766	-7.16085	0.00149481	0.0277609
ENSRNOT00000005671	Tshr-201	ENSRNOG00000003972	Tshr	6:115170865-115306871	0.374025	4.40096	-2.75586	0.00149624	0.027768
ENSRNOT00000001921	Plod3-201	ENSRNOG00000001417	Plod3	12:22716423-22726982	116.447	41.8037	2.28254	0.00150055	0.0278045
ENSRNOT00000085693	Drp2-202	ENSRNOG00000026704	Drp2	X:105239620-105289808	0.184761	3.91573	-3.60343	0.00150127	0.0278045
ENSRNOT00000012328	Epha2-201	ENSRNOG00000009222	Epha2	5:159845774-159874206	5.29524	0.937231	3.30586	0.00150657	0.0278503
ENSRNOT00000040559	Stxbp5-201	ENSRNOG00000013351	Stxbp5	1:3861953-4011511	0.205294	3.21456	-3.14252	0.00150671	0.0278503
ENSRNOT00000019057	Lhfpl6-201	ENSRNOG00000014153	Lhfpl6	2:142262236-142461980	68.7557	29.0757	2.046	0.00150826	0.0278503
ENSRNOT00000050531	Prmt2-201	ENSRNOG00000001297	Prmt2	20:13156241-13212606	23.471	8.32477	2.31024	0.00150934	0.0278503
ENSRNOT00000040488	Mink1-201	ENSRNOG00000033508	Mink1	10:57185347-57238531	0.745977	9.4221	-2.84328	0.00151016	0.0278503
TCONS_00003874	TCONS_00003874	XLOC_003176	XLOC_003176	1:50070240-50491440	0.276399	2.83647	-2.57489	0.00151069	0.0278503
ENSRNOT00000022731	Pifo-201	ENSRNOG00000016842	Pifo	2:208616603-208623314	0	2.18424	-12.3853	0.00151071	0.0278503
ENSRNOT00000090385	Rab23-202	ENSRNOG00000012629	Rab23	9:38470298-38495176	5.2271	0.349267	4.68223	0.00151088	0.0278503
ENSRNOT00000071442	Snx27-202	ENSRNOG00000020893	Snx27	2:195738619-195821608	0	0.922528	-14.7441	0.0015116	0.0278503
ENSRNOT00000001712	Hvcn1-201	ENSRNOG00000001270	Hvcn1	12:39822637-39850567	0.155457	4.51963	-4.05632	0.00151429	0.0278904
ENSRNOT00000087617	LOC103690302-201	ENSRNOG00000052572	LOC103690302	X:153539668-154051181	0.189941	1.9647	-2.57656	0.00151897	0.0279572
ENSRNOT00000083429	Plec-206	ENSRNOG00000023781	Plec	7:117230321-117265493	10.7544	2.2856	3.02041	0.00152325	0.0280264
ENSRNOT00000035355	Stox1-201	ENSRNOG00000023712	Stox1	20:32276857-32353677	0	0.0522967	-10.5019	0.00152501	0.0280481
ENSRNOT00000084865	Tnrc18-202	ENSRNOG00000024482	Tnrc18	12:13810180-13904818	35.0542	13.9703	2.13151	0.00152559	0.0280481
ENSRNOT00000064949	Smim17-201	ENSRNOG00000042502	Smim17	1:71115043-71135764	0	0.161436	-10.2318	0.00152743	0.0280647
ENSRNOT00000079593	Rgs5-202	ENSRNOG00000002730	Rgs5	13:87966758-88003035	0	0.403997	-12.3778	0.00153884	0.0282162
ENSRNOT00000093181	Med14-203	ENSRNOG00000003792	Med14	X:10964067-11082565	0.332893	0	14.5188	0.00153936	0.0282162
ENSRNOT00000072450	Lmo3-201	ENSRNOG00000047450	Lmo3	4:172942020-173005634	0.004276	1.36381	-7.42194	0.00154201	0.0282551
ENSRNOT00000014084	Oprd1-201	ENSRNOG00000010531	Oprd1	5:150288126-150323063	0.0587913	0	10.3747	0.00154847	0.0283539
ENSRNOT00000078153	Kcnc3-203	ENSRNOG00000019959	Kcnc3	1:100593680-100605267	0.198024	0	10.535	0.00154962	0.0283653
ENSRNOT00000054925	Ogfod3-201	ENSRNOG00000036668	Ogfod3	10:110378534-110406377	8.45377	1.96775	2.91115	0.0015572	0.0284846
ENSRNOT00000047840	Hnrnpd-203	ENSRNOG00000002292	Hnrnpd	14:11256268-11274578	3.89534	0.327596	4.38482	0.00155973	0.0285114
ENSRNOT00000059548	Phf1-201	ENSRNOG00000000480	Phf1	20:5526975-5531939	0.627034	0	10.95	0.00156739	0.0286416
ENSRNOT00000018009	Prkcsh-201	ENSRNOG00000013360	Prkcsh	8:23014956-23026503	144.586	54.221	2.22034	0.00157311	0.0287125
ENSRNOT00000092456	Rpl39-204	ENSRNOG00000043348	Rpl39	X:123705235-123708211	175.644	49.198	2.64081	0.00157467	0.0287257
ENSRNOT00000020332	Nrg4-201	ENSRNOG00000015149	Nrg4	8:59782974-59849427	0	0.220871	-12.3955	0.00157692	0.0287372
ENSRNOT00000011314	Rps20-201	ENSRNOG00000008555	Rps20	5:16706082-16706909	633.681	178.261	2.62638	0.00157789	0.0287452
ENSRNOT00000054776	RGD1560242-201	ENSRNOG00000036615	RGD1560242	1:241338704-241460868	0	0.116882	-12.3485	0.00158428	0.0288208
ENSRNOT00000045587	Lhx3-202	ENSRNOG00000018427	Lhx3	3:3654755-3660006	0.350607	0	10.1735	0.00158444	0.0288208
ENSRNOT00000047848	Acan-201	ENSRNOG00000028992	Acan	1:140762758-140824441	3.63481	0.74574	3.10156	0.00158739	0.0288593
ENSRNOT00000091283	Nop58-202	ENSRNOG00000016486	Nop58	9:66495840-66519788	0.170969	0	11.3886	0.00159107	0.0289067
ENSRNOT00000077225	Tnfrsf19-202	ENSRNOG00000014265	Tnfrsf19	15:41246308-41338284	1.23774	12.6287	-2.558	0.00159212	0.0289083
ENSRNOT00000087022	Scn3b-201	ENSRNOG00000057221	Scn3b	8:44136496-44159010	0.535755	10.1482	-3.44269	0.00159224	0.0289083
ENSRNOT00000045270	Col28a1-201	ENSRNOG00000033618	Col28a1	4:34048533-34194764	0.013954	0	10.3531	0.0016114	0.0291966
ENSRNOT00000026731	Kcna1-201	ENSRNOG00000019750	Kcna1	4:159190804-159192526	0	1.82023	-10.1486	0.00161478	0.0292303
ENSRNOT00000012296	Ifi27-201	ENSRNOG00000009263	Ifi27	6:127327959-127334428	27.2092	249.376	-2.39165	0.00162174	0.0293146
ENSRNOT00000011926	Dach1-201	ENSRNOG00000008834	Dach1	15:82099159-82482009	2.51551	0.830882	2.41176	0.00162263	0.0293207
ENSRNOT00000012279	Dynll2-201	ENSRNOG00000008921	Dynll2	10:75262537-75270561	26.9905	6.08151	2.95696	0.00162347	0.029326
ENSRNOT00000088493	Epb41-206	ENSRNOG00000010037	Epb41	5:150084611-150167077	0.00253867	1.88065	-8.62005	0.00162906	0.0293973
ENSRNOT00000067042	Rorc-201	ENSRNOG00000020836	Rorc	2:195617021-195637630	0	0.150976	-10.1417	0.00163912	0.0294993
ENSRNOT00000012632	Epsti1-201	ENSRNOG00000009471	Epsti1	15:60084918-60190363	0	0.149485	-12.4714	0.00164229	0.0295364
ENSRNOT00000089345	Fblim1-202	ENSRNOG00000011774	Fblim1	5:160122425-160158386	9.58639	2.53618	2.7275	0.00164959	0.0296532
ENSRNOT00000041815	Bcar1-201	ENSRNOG00000019253	Bcar1	19:43932554-43955783	45.0117	15.5386	2.34085	0.00165649	0.0297518
ENSRNOT00000035245	Cass4-201	ENSRNOG00000021560	Cass4	3:170399302-170438993	0	0.0828837	-10.2261	0.00167155	0.0299619
ENSRNOT00000083702	Akap12-203	ENSRNOG00000019549	Akap12	1:40879747-40906581	15.6074	2.50671	3.44523	0.00167937	0.0300619
ENSRNOT00000039829	Fam177a1-201	ENSRNOG00000046391	Fam177a1	6:76041669-76053759	15.1123	3.09375	3.09565	0.0016824	0.030106
ENSRNOT00000077649	Ccdc92b-201	ENSRNOG00000057228	Ccdc92b	10:61403277-61421728	0.002002	1.36049	-8.18627	0.00168849	0.0301848
ENSRNOT00000050702	AC128059.1-201	ENSRNOG00000029586	AC128059.1	8:116776494-116779156	0	1.18856	-10.1513	0.00169165	0.0302233
ENSRNOT00000056221	Cyth4-201	ENSRNOG00000007679	Cyth4	7:119820540-119845003	0	0.566589	-12.2879	0.00169373	0.030248
ENSRNOT00000020201	Gna14-201	ENSRNOG00000014840	Gna14	1:235166718-235347937	0.16673	2.20811	-2.91781	0.00169701	0.0302966
ENSRNOT00000084129	Tspyl2-201	ENSRNOG00000061782	Tspyl2	X:22408118-22413714	0.789006	0	11.4945	0.00170038	0.0303366
ENSRNOT00000071315	Magi1-202	ENSRNOG00000022060	Magi1	4:125690237-125958112	2.59958	0.680906	2.73142	0.00170195	0.0303544
ENSRNOT00000005172	Wipi1-201	ENSRNOG00000003827	Wipi1	10:97859727-97896525	32.8144	11.7322	2.28711	0.0017149	0.0305445
ENSRNOT00000073289	Was-202	ENSRNOG00000031058	Was	X:15155230-15164105	0	0.34029	-10.091	0.00172037	0.0306217
ENSRNOT00000027260	Atf5-201	ENSRNOG00000020060	Atf5	1:100808241-100810522	188.584	52.9598	2.63689	0.00172548	0.0306821
ENSRNOT00000047970	Ebf1-201	ENSRNOG00000028845	Ebf1	10:23661343-23687606	0.292456	0	12.2103	0.0017266	0.0306918
ENSRNOT00000006225	Slc38a10-201	ENSRNOG00000004604	Slc38a10	10:109284957-109333899	45.4905	18.2194	2.12558	0.00173088	0.0307373
ENSRNOT00000005471	Rpl23-201	ENSRNOG00000004107	Rpl23	10:85721394-85725429	134.297	38.7118	2.59156	0.00173792	0.0308213
ENSRNOT00000050721	Cars-201	ENSRNOG00000020651	Cars	1:216759366-216801656	33.6194	12.5718	2.22497	0.00174162	0.0308767
ENSRNOT00000015332	Pkm-201	ENSRNOG00000011329	Pkm	8:64481172-64502722	367.14	149.272	2.09993	0.00175098	0.0310115
ENSRNOT00000074488	LOC100911492-201	ENSRNOG00000048322	LOC100911492	15:25502019-25505691	0.462154	0	10.08	0.0017528	0.0310235
ENSRNOT00000050070	Mapt-204	ENSRNOG00000005133	Mapt	10:92289107-92382723	0.0792253	0	12.2198	0.00176266	0.0311774
ENSRNOT00000083162	Sept8-202	ENSRNOG00000007462	2021-09-08	10:38877503-38906482	13.4625	3.68495	2.67087	0.00177125	0.0312983
ENSRNOT00000045329	Faim-201	ENSRNOG00000030463	Faim	8:107225212-107240953	0.491825	0	12.2473	0.00178099	0.0314155
ENSRNOT00000051910	Tars-201	ENSRNOG00000019023	Tars	2:61395285-61414038	1.70917	0	14.3604	0.0017814	0.0314155
ENSRNOT00000054864	Lsp1-201	ENSRNOG00000020300	Lsp1	1:215628785-215662504	10.5851	2.7448	2.74513	0.00178521	0.0314723
ENSRNOT00000037369	Slc22a3-201	ENSRNOG00000022946	Slc22a3	1:48433079-48521256	0	0.034129	-10.0823	0.00178694	0.0314924
ENSRNOT00000004713	Adamts4-201	ENSRNOG00000003538	Adamts4	13:89622632-89634419	6.30307	0.73242	3.90774	0.00179345	0.0315874
ENSRNOT00000084990	Bmp7-201	ENSRNOG00000053384	Bmp7	3:170879973-170955399	0.00511933	1.41911	-7.277	0.00179801	0.0316297
ENSRNOT00000084839	Sirt2-202	ENSRNOG00000020102	Sirt2	1:86948918-86971495	22.4705	171.783	-2.12942	0.00179827	0.0316297
ENSRNOT00000000541	Slc39a7-201	ENSRNOG00000000465	Slc39a7	20:3819423-3822754	72.6774	17.641	2.85145	0.00180557	0.0317222
ENSRNOT00000048677	Rasgrp4-201	ENSRNOG00000033744	Rasgrp4	1:88078350-88094330	0	0.200972	-10.1715	0.00180591	0.0317222
ENSRNOT00000046142	Rsbn1l-201	ENSRNOG00000013431	Rsbn1l	4:10748745-10809142	0.523737	0	14.3414	0.0018119	0.031817
ENSRNOT00000087977	Atrx-204	ENSRNOG00000056703	Atrx	X:76823010-76925195	0.60258	0.00328367	8.32657	0.0018184	0.0319168
ENSRNOT00000071603	LOC103689947-201	ENSRNOG00000047158	LOC103689947	2:195416469-195423787	1.00591	0	12.1556	0.00182589	0.0320101
ENSRNOT00000030246	Cep170b-201	ENSRNOG00000033688	Cep170b	6:137288810-137311932	21.9542	6.66576	2.5277	0.00182834	0.0320321
ENSRNOT00000088568	Adgrb2-202	ENSRNOG00000014375	Adgrb2	5:148193710-148231577	3.19262	31.6631	-2.51206	0.00184628	0.0322831
ENSRNOT00000056496	Epha10-201	ENSRNOG00000037340	Epha10	5:142875773-142908395	0	0.0949273	-10.1152	0.00185211	0.0323639
ENSRNOT00000075624	Glis1-202	ENSRNOG00000000138	Glis1	5:127160495-127233078	0.426963	0	14.3117	0.00186166	0.0325194
ENSRNOT00000091814	Rorb-202	ENSRNOG00000013413	Rorb	1:234252757-234435839	1.699	13.968	-2.24137	0.00186714	0.0325856
ENSRNOT00000024156	Ucp2-201	ENSRNOG00000017854	Ucp2	1:165506361-165512744	103.545	33.6777	2.43025	0.00186734	0.0325856
ENSRNOT00000008941	Ddit3-201	ENSRNOG00000006789	Ddit3	7:70580252-70585074	1.43173	0	12.1242	0.00186784	0.0325856
ENSRNOT00000043693	COX2-201	ENSRNOG00000030371	COX2	MT:7006-7689	268.63	47.7278	3.28467	0.00186851	0.0325865
ENSRNOT00000017042	Lgals9-201	ENSRNOG00000012681	Lgals9	10:64737088-64759787	0	0.67883	-12.4136	0.00187128	0.0326238
ENSRNOT00000040637	Slc16a2-201	ENSRNOG00000002832	Slc16a2	X:74577131-74706214	2.7412	21.7787	-2.18287	0.00187715	0.0327053
ENSRNOT00000039045	Dixdc1-201	ENSRNOG00000010260	Dixdc1	8:55091235-55144087	0.230058	0	12.9621	0.0018793	0.0327321
ENSRNOT00000020443	Anp32a-201	ENSRNOG00000014846	Anp32a	8:67295727-67333247	23.5145	7.98677	2.36283	0.0018852	0.0328028
ENSRNOT00000045256	Plp2-201	ENSRNOG00000039496	Plp2	X:15679254-15682652	54.6986	11.6152	3.04186	0.00188873	0.0328323
TCONS_00008537	TCONS_00008537	XLOC_006577	XLOC_006577	1:98168469-98201603	0.222588	0	12.1487	0.00189378	0.0328602
ENSRNOT00000001182	Auts2-201	ENSRNOG00000000885	Auts2	12:28212333-28251816	2.00272	0.203047	4.11224	0.00189398	0.0328602
ENSRNOT00000041548	Rbms3-204	ENSRNOG00000025881	Rbms3	8:124661839-125544427	0	0.074387	-14.4966	0.00189442	0.0328602
ENSRNOT00000013900	Arfgap1-201	ENSRNOG00000043150	Arfgap1	3:176475893-176489925	36.0122	10.9534	2.52699	0.00189586	0.0328602
ENSRNOT00000010831	Cyp11a1-201	ENSRNOG00000008074	Cyp11a1	8:62779875-62809893	0.056181	0	10.0549	0.00190061	0.0329168
ENSRNOT00000089468	Smad2-202	ENSRNOG00000018140	Smad2	18:72571327-72611291	1.19149	0.0437087	5.58503	0.00190607	0.0329838
ENSRNOT00000082304	Lgals3-202	ENSRNOG00000010645	Lgals3	15:24141651-24165535	1.27247	0	14.2835	0.00190868	0.0330181
ENSRNOT00000023861	Kif5b-201	ENSRNOG00000017466	Kif5b	17:54181419-54212096	34.6113	12.5161	2.27342	0.00191438	0.0331062
ENSRNOT00000082723	Itpr1-205	ENSRNOG00000007104	Itpr1	4:140377565-140579477	4.55029	0.647702	3.57802	0.00191799	0.0331363
ENSRNOT00000017353	Ehd2-201	ENSRNOG00000011346	Ehd2	1:77847600-77865870	122.536	49.8884	2.1022	0.00191919	0.0331465
ENSRNOT00000029017	Pld4-201	ENSRNOG00000028566	Pld4	6:137323713-137331231	0.00657367	1.98712	-7.28878	0.00192814	0.0332903
ENSRNOT00000064168	Ildr2-202	ENSRNOG00000025151	Ildr2	13:84474362-84530031	0.129042	0	12.1045	0.00193483	0.0333949
ENSRNOT00000024364	Ubap2l-201	ENSRNOG00000017990	Ubap2l	2:189334341-189400323	19.4519	7.32912	2.21924	0.00194045	0.0334813
ENSRNOT00000005561	Enpp2-201	ENSRNOG00000004089	Enpp2	7:94480396-94563001	0	0.76829	-14.4735	0.00194234	0.0335004
ENSRNOT00000051525	Clec4a2-201	ENSRNOG00000030012	Clec4a2	4:155792761-155867708	0	0.172542	-12.194	0.00194443	0.0335004
ENSRNOT00000083277	Nova1-202	ENSRNOG00000031440	Nova1	6:66963510-67085390	0.364612	5.13132	-3.02437	0.00195089	0.0335748
ENSRNOT00000084682	Arpc2-207	ENSRNOG00000014289	Arpc2	9:81518271-81548656	126.37	51.7127	2.09081	0.00195232	0.0335886
ENSRNOT00000080900	RT1-A1-203	ENSRNOG00000038999	RT1-A1	20:5414457-5418019	2.76903	0.0310307	7.10052	0.00195671	0.0336404
ENSRNOT00000027305	Eef1g-201	ENSRNOG00000020075	Eef1g	1:225163391-225173995	868.762	378.261	2.00796	0.0019614	0.0336907
ENSRNOT00000073493	Mamdc2-202	ENSRNOG00000024620	Mamdc2	1:241072072-241155537	2.53319	21.5543	-2.28137	0.00196314	0.0337097
ENSRNOT00000006521	Mta1-201	ENSRNOG00000004711	Mta1	6:137924293-137950075	27.817	9.21127	2.39862	0.00196734	0.0337386
ENSRNOT00000022050	Cramp1-201	ENSRNOG00000024635	Cramp1	10:14326802-14373334	5.77008	1.18	3.10088	0.00197136	0.0337858
ENSRNOT00000073315	Car10-201	ENSRNOG00000002626	Car10	10:80790168-81074579	0	0.220707	-14.4576	0.00197327	0.0338077
ENSRNOT00000039378	Rgs22-201	ENSRNOG00000025551	Rgs22	7:74783019-74901997	0.21984	2.96899	-2.95992	0.00200616	0.0342726
ENSRNOT00000076738	Gpank1-202	ENSRNOG00000000848	Gpank1	20:5114013-5116377	2.20067	0.0154827	7.70826	0.00200728	0.0342806
ENSRNOT00000089108	Dlg4-202	ENSRNOG00000018526	Dlg4	10:56627411-56652819	2.11411	0.181954	4.35835	0.00201145	0.03433
ENSRNOT00000017588	Atox1-201	ENSRNOG00000013118	Atox1	10:40790845-40805941	80.1185	29.2401	2.25854	0.00202466	0.0345004
ENSRNOT00000008965	Htr3a-201	ENSRNOG00000006595	Htr3a	8:53211438-53223804	0	0.229117	-9.99539	0.00203309	0.0345891
ENSRNOT00000039581	Mettl11b-201	ENSRNOG00000025415	Mettl11b	13:81988926-82006005	0	0.176677	-10.0861	0.00203607	0.0346177
ENSRNOT00000024829	RGD1307554-201	ENSRNOG00000018408	RGD1307554	1:84364368-84386751	1.38518	0.00229233	9.96126	0.00204339	0.0347091
ENSRNOT00000022213	Lrp5-201	ENSRNOG00000015911	Lrp5	1:218816841-218920094	17.5033	6.95202	2.14092	0.00204717	0.0347403
ENSRNOT00000085875	AABR07015078.1-201	ENSRNOG00000055956	AABR07015078.1	14:46649971-46650381	18.817	0.160563	7.48904	0.00204835	0.0347493
ENSRNOT00000014284	Fam181b-201	ENSRNOG00000010763	Fam181b	1:157920786-157922274	0.682948	35.2461	-4.86503	0.00204922	0.034753
ENSRNOT00000043626	Cacna1h-201	ENSRNOG00000033893	Cacna1h	10:14730941-14788617	0.141716	3.02297	-3.59979	0.00205388	0.0348209
ENSRNOT00000028265	Syne4-201	ENSRNOG00000049277	Syne4	1:88772904-88776999	0.388485	0	9.98072	0.00205791	0.0348562
ENSRNOT00000017442	Lix1-201	ENSRNOG00000012988	Lix1	1:59156251-59214452	0.152243	3.2711	-3.62235	0.00206247	0.0349004
ENSRNOT00000061616	Amotl1-201	ENSRNOG00000008990	Amotl1	8:13042641-13109487	33.0423	13.5191	2.09863	0.0020632	0.0349016
ENSRNOT00000017568	Pdlim3-202	ENSRNOG00000012658	Pdlim3	16:49543147-49574314	10.419	2.67767	2.75837	0.00206705	0.0349378
ENSRNOT00000022329	Scgn-201	ENSRNOG00000016628	Scgn	17:43357888-43399321	0	0.29296	-12.1127	0.0020724	0.0350019
ENSRNOT00000013243	St3gal4-201	ENSRNOG00000009850	St3gal4	8:36264750-36314811	16.5235	5.64502	2.3612	0.00207983	0.0351052
ENSRNOT00000029593	Rcan2-202	ENSRNOG00000010350	Rcan2	9:19518558-19613360	0.177891	3.59406	-3.55502	0.00208943	0.0352182
ENSRNOT00000048704	Syt7-208	ENSRNOG00000026432	Syt7	1:226435979-226493247	0.137171	8.36832	-5.14195	0.00208981	0.0352182
ENSRNOT00000076125	Uck2-202	ENSRNOG00000003917	Uck2	13:85392600-85443784	10.3154	2.14351	3.07645	0.00209619	0.0353034
ENSRNOT00000013771	Mrps23-201	ENSRNOG00000010363	Mrps23	10:75529009-75536767	24.8039	1.17128	5.20134	0.00210156	0.0353717
ENSRNOT00000093284	Dclk1-204	ENSRNOG00000032922	Dclk1	2:144861455-144936807	0.573009	0.00617633	7.35288	0.00210429	0.0354033
ENSRNOT00000016759	Supt6h-201	ENSRNOG00000012240	Supt6h	10:65470471-65507581	22.119	7.57335	2.35565	0.00210477	0.0354033
ENSRNOT00000015958	S100a4-201	ENSRNOG00000011821	S100a4	2:189997129-189999604	414.913	143.316	2.33539	0.00210805	0.0354367
ENSRNOT00000030428	Rpl5-201	ENSRNOG00000023529	Rpl5	14:2860965-2867397	251.886	96.8932	2.18146	0.00210807	0.0354367
ENSRNOT00000046058	Gucy1a2-201	ENSRNOG00000029876	Gucy1a2	8:408001-899974	0.367319	3.24149	-2.35154	0.00211239	0.0354631
ENSRNOT00000009965	Top1mt-201	ENSRNOG00000007500	Top1mt	7:116688803-116711837	3.06068	0.093168	5.84287	0.00211296	0.0354631
ENSRNOT00000007795	Nek10-201	ENSRNOG00000005883	Nek10	15:11635932-11812485	0.0403247	0	12.1308	0.00211499	0.0354861
ENSRNOT00000025217	Rpl17-201	ENSRNOG00000018680	Rpl17	18:70970596-70972821	334.139	106.349	2.45705	0.00212559	0.0356416
ENSRNOT00000090870	Mitd1-202	ENSRNOG00000018467	Mitd1	9:44472538-44560837	0	0.138587	-12.1013	0.00212728	0.0356588
ENSRNOT00000079190	Asphd2-201	ENSRNOG00000061004	Asphd2	12:50269347-50278974	0	6.24151	-14.3687	0.00212872	0.0356717
ENSRNOT00000008879	Lrrn1-201	ENSRNOG00000006802	Lrrn1	4:139670092-139673143	0.0390223	5.49133	-6.26543	0.00213144	0.0356949
ENSRNOT00000080934	Tbc1d9-202	ENSRNOG00000003496	Tbc1d9	19:24329544-24429909	3.07349	0.657294	3.03664	0.00215181	0.0359797
ENSRNOT00000044477	Hnrnpu-201	ENSRNOG00000033790	Hnrnpu	13:96229688-96238474	41.1119	11.4058	2.65754	0.00215369	0.0359888
ENSRNOT00000091370	Agtpbp1-202	ENSRNOG00000018651	Agtpbp1	17:5513930-5614435	0.028644	4.33241	-6.4828	0.00216663	0.0361712
ENSRNOT00000038537	Unc5b-201	ENSRNOG00000000567	Unc5b	20:30339673-30406295	20.8178	8.08916	2.17251	0.00217296	0.0362655
ENSRNOT00000075878	RGD1565355-204	ENSRNOG00000040108	RGD1565355	4:14039977-14241272	0	0.0692967	-12.271	0.00217516	0.0362909
ENSRNOT00000015692	Aqp1-201	ENSRNOG00000011648	Aqp1	4:85551503-85563683	18.8017	159.169	-2.2708	0.00218306	0.0363774
ENSRNOT00000075762	Hmgn1-201	ENSRNOG00000050978	Hmgn1	11:36474840-36479868	24.178	3.0579	3.76795	0.00218486	0.0363846
ENSRNOT00000082717	Eya1-202	ENSRNOG00000007590	Eya1	5:4393472-4513142	0	0.467671	-14.339	0.0021919	0.0364603
ENSRNOT00000073683	Gtf2f1-201	ENSRNOG00000047134	Gtf2f1	9:10033011-10042418	17.4688	3.53975	3.10701	0.00219213	0.0364603
ENSRNOT00000014570	Neurog2-201	ENSRNOG00000010972	Neurog2	2:231962517-231963308	0	3.41211	-9.9333	0.00220715	0.0366647
ENSRNOT00000021705	Rpf1-201	ENSRNOG00000015969	Rpf1	2:252368329-252382955	1.30961	0.0100703	7.70783	0.00221037	0.0366953
ENSRNOT00000084899	Zfp787-202	ENSRNOG00000015456	Zfp787	1:71416110-71446749	0.890092	0	14.1274	0.00221108	0.0366958
ENSRNOT00000016801	Rarg-201	ENSRNOG00000012499	Rarg	7:143840739-143852119	21.4369	5.37901	2.80374	0.0022149	0.0367363
ENSRNOT00000077981	Sertad4-201	ENSRNOG00000060773	Sertad4	13:111574609-111581019	21.1523	3.82826	3.27023	0.00221596	0.0367425
ENSRNOT00000000039	Nuak2-201	ENSRNOG00000000034	Nuak2	13:49092306-49109050	70.5664	26.7633	2.20409	0.00222914	0.0369381
ENSRNOT00000078233	Kif4a-202	ENSRNOG00000038035	Kif4a	X:70461718-70561189	0.0169717	0	10.083	0.00223678	0.0370532
ENSRNOT00000090230	Tagln3-202	ENSRNOG00000059539	Tagln3	11:60072727-60086553	0.11118	8.90688	-5.45495	0.00224076	0.0371078
ENSRNOT00000090554	Pitpna-202	ENSRNOG00000003846	Pitpna	10:63731959-63769424	1.99557	0.0109923	8.26373	0.00224523	0.0371435
ENSRNOT00000091552	Clec7a-202	ENSRNOG00000054251	Clec7a	4:163216163-163227242	0	0.234987	-9.88519	0.00224556	0.0371435
ENSRNOT00000090984	Phf5a-202	ENSRNOG00000024170	Phf5a	7:123095810-123101851	0.251202	0	9.92214	0.00225571	0.0372631
ENSRNOT00000013512	Leo1-201	ENSRNOG00000010116	Leo1	8:82380757-82405644	2.11628	0.179946	4.37044	0.00226073	0.0373229
ENSRNOT00000014277	Atoh8-201	ENSRNOG00000010716	Atoh8	4:100067341-100099517	20.8971	6.60587	2.47272	0.00226177	0.0373286
ENSRNOT00000018821	Slc6a12-201	ENSRNOG00000013547	Slc6a12	4:153921115-153941391	0	0.154439	-10.1461	0.00227311	0.0374581
ENSRNOT00000027695	Terf2-201	ENSRNOG00000020435	Terf2	19:39272499-39300893	4.56984	0.753315	3.3909	0.00227544	0.0374734
TCONS_00150522	TCONS_00150522	XLOC_117419	XLOC_117419	17:2880664-2904981	0.062602	0	9.89661	0.00227774	0.0374997
ENSRNOT00000065801	Angptl1-201	ENSRNOG00000004712	Angptl1	13:74456487-74463031	0	0.384835	-9.8325	0.00228273	0.037566
ENSRNOT00000005273	Ergic1-201	ENSRNOG00000003508	Ergic1	10:16821880-16910641	56.1924	24.7637	1.98878	0.00228422	0.037566
ENSRNOT00000054947	Notum-201	ENSRNOG00000036680	Notum	10:109832981-109840047	0.032762	5.55551	-6.55846	0.00228452	0.037566
ENSRNOT00000075525	LOC103689927-201	ENSRNOG00000047719	LOC103689927	10:37073345-37084637	0	4.78874	-14.2894	0.0022848	0.037566
ENSRNOT00000075987	Bud31-202	ENSRNOG00000000989	Bud31	12:11232964-11240399	1.03692	0	12.2977	0.00228528	0.037566
ENSRNOT00000042539	Ppard-201	ENSRNOG00000000503	Ppard	20:7818289-7883482	0	0.85595	-14.2878	0.0022875	0.0375911
ENSRNOT00000029782	RGD1359290-201	ENSRNOG00000027271	RGD1359290	10:95642640-95657977	68.1608	24.4822	2.28024	0.00228973	0.0375964
ENSRNOT00000043449	Arhgef7-202	ENSRNOG00000012934	Arhgef7	16:83006718-83132785	0.0371257	1.16087	-4.14359	0.00228992	0.0375964
ENSRNOT00000064947	Dcc-201	ENSRNOG00000033099	Dcc	18:66523120-67224566	0.0136113	0.808523	-5.04249	0.00229335	0.0376294
ENSRNOT00000086374	Mink1-202	ENSRNOG00000033508	Mink1	10:57185401-57237973	11.2211	0.604139	5.00705	0.00230551	0.0377666
ENSRNOT00000082892	Scn5a-203	ENSRNOG00000015049	Scn5a	8:128171379-128249538	0.0209367	0	9.9838	0.00230595	0.0377666
ENSRNOT00000017758	Tnfsf10-201	ENSRNOG00000013269	Tnfsf10	2:113007549-113026899	0	0.159102	-10.1116	0.00230905	0.0377831
TCONS_00119970	TCONS_00119970	XLOC_091662	XLOC_091662	15:3691620-3750119	0.893859	0.010252	7.2647	0.00231006	0.0377831
ENSRNOT00000025523	Car14-201	ENSRNOG00000023162	Car14	2:198010349-198016898	0.005833	2.52667	-7.919	0.00231455	0.0378264
ENSRNOT00000074336	Igsf21-201	ENSRNOG00000049959	Igsf21	5:158503244-158549496	0.027817	5.78221	-6.82712	0.00231704	0.0378556
ENSRNOT00000041493	Kif1c-201	ENSRNOG00000031364	Kif1c	10:57322331-57351353	73.6696	30.4328	2.08047	0.00232492	0.0379727
ENSRNOT00000017937	Pdzd2-201	ENSRNOG00000013140	Pdzd2	2:62399748-62634785	2.29743	0.742404	2.43593	0.00233852	0.0381539
ENSRNOT00000006004	Dpys-201	ENSRNOG00000004298	Dpys	7:78769807-78847974	0.0190953	0	9.86527	0.00233886	0.0381539
ENSRNOT00000013105	Col9a3-201	ENSRNOG00000009531	Col9a3	3:176102351-176124306	10.5219	2.62239	2.80999	0.00236017	0.0384078
ENSRNOT00000003986	C1ql1-201	ENSRNOG00000002963	C1ql1	10:91040005-91047177	13.0746	125.405	-2.45805	0.00236428	0.0384631
ENSRNOT00000088482	Crym-201	ENSRNOG00000061215	Crym	1:189944895-189960073	6.9323	65.7129	-2.44142	0.00236723	0.0384752
ENSRNOT00000029435	Hsp90b1-201	ENSRNOG00000026963	Hsp90b1	7:27226569-27240528	217.207	90.8944	2.0636	0.00236791	0.0384752
ENSRNOT00000032047	Lman1-201	ENSRNOG00000024470	Lman1	18:61685117-61707317	32.6112	11.2217	2.34402	0.00237307	0.0385285
ENSRNOT00000020141	Wdr63-201	ENSRNOG00000014893	Wdr63	2:251912368-251970768	0.00485333	1.21638	-7.23105	0.00237334	0.0385285
ENSRNOT00000021082	Mall-201	ENSRNOG00000015599	Mall	3:120272583-120306551	1.92277	0.210857	4.00141	0.00237429	0.0385301
ENSRNOT00000090165	Plcg2-201	ENSRNOG00000051986	Plcg2	19:50045020-50173220	1.1758	0.235198	3.13249	0.00237488	0.0385301
ENSRNOT00000012887	Kras-202	ENSRNOG00000009338	Kras	4:179486105-179515558	4.81848	0.733423	3.52236	0.00237873	0.0385622
ENSRNOT00000072528	Wbp11-201	ENSRNOG00000049593	Wbp11	4:170772647-170783725	0.753366	0.00765133	7.32859	0.00237918	0.0385622
ENSRNOT00000090299	Dzip1l-202	ENSRNOG00000014746	Dzip1l	8:107875991-107916294	9.4344	2.74392	2.58673	0.00238118	0.0385622
ENSRNOT00000061814	Zcchc2-202	ENSRNOG00000002882	Zcchc2	13:25966428-26000768	0.074378	3.18436	-4.60095	0.0023908	0.0386813
ENSRNOT00000013530	Eomes-201	ENSRNOG00000042140	Eomes	8:127144903-127151493	0	0.4028	-9.91944	0.00239143	0.0386813
ENSRNOT00000041420	Armh4-201	ENSRNOG00000031849	Armh4	15:26587179-26678420	29.3015	11.9074	2.10462	0.00239961	0.0387902
ENSRNOT00000015571	Tmem63c-201	ENSRNOG00000011334	Tmem63c	6:111049559-111118873	0.0884067	0	11.9451	0.00240366	0.0388439
ENSRNOT00000022971	Lhpp-201	ENSRNOG00000017097	Lhpp	1:204617852-204708987	9.50796	3.28873	2.34417	0.00241957	0.0390421
ENSRNOT00000028544	Mag-201	ENSRNOG00000021023	Mag	1:89345429-89360733	0.012025	2.02295	-6.53812	0.00242204	0.0390702
ENSRNOT00000006833	Scrt2-201	ENSRNOG00000005148	Scrt2	3:147585947-147597660	0	0.3362	-10.4662	0.00242294	0.0390729
ENSRNOT00000010358	Wscd1-201	ENSRNOG00000007869	Wscd1	10:58342393-58371196	1.42755	21.9641	-3.13277	0.00243274	0.0391956
ENSRNOT00000011005	Nppa-201	ENSRNOG00000008176	Nppa	5:164808323-164809705	0	1.80328	-9.82202	0.00244175	0.0393053
ENSRNOT00000081705	Exosc8-201	ENSRNOG00000051623	Exosc8	2:143925546-143931316	0.390779	0.000259	8.82469	0.00244378	0.039326
ENSRNOT00000012670	Fbxo2-201	ENSRNOG00000009409	Fbxo2	5:164972480-164977916	4.91905	64.1114	-2.90106	0.00244891	0.0393968
ENSRNOT00000014764	Calcb-201	ENSRNOG00000011074	Calcb	1:184271590-184276475	0	0.56802	-9.98376	0.00245635	0.0394927
ENSRNOT00000078265	Angel1-202	ENSRNOG00000010567	Angel1	6:110644267-110681408	2.9e-05	2.17162	-12.6624	0.00245709	0.0394928
ENSRNOT00000074793	Adamts20-202	ENSRNOG00000033397	Adamts20	7:135550808-135630654	0	0.665017	-14.2162	0.00245855	0.0395043
ENSRNOT00000077719	Dnaaf3-202	ENSRNOG00000038600	Dnaaf3	1:72874583-72883002	0.34515	0	10.8602	0.00245945	0.0395069
ENSRNOT00000086140	Cfb-203	ENSRNOG00000000419	Cfb	20:4536203-4542947	0.00644367	1.54102	-6.64157	0.00248651	0.0399021
ENSRNOT00000009763	Hgf-201	ENSRNOG00000007027	Hgf	4:15433295-15505362	0.115287	2.41741	-3.58324	0.00248703	0.0399021
ENSRNOT00000011347	Amotl2-201	ENSRNOG00000008487	Amotl2	8:111210811-111226193	91.8218	36.2535	2.14728	0.00248794	0.0399048
ENSRNOT00000015104	Lgi3-201	ENSRNOG00000011323	Lgi3	15:52220578-52227706	0.163268	7.48186	-4.70032	0.00248912	0.0399117
ENSRNOT00000014464	Anxa6-201	ENSRNOG00000010668	Anxa6	10:40320581-40375605	278.126	123.747	1.97416	0.0024937	0.0399611
ENSRNOT00000075610	Mmp14-201	ENSRNOG00000010947	Mmp14	15:33074441-33083655	147.161	58.1323	2.14562	0.00249496	0.0399695
ENSRNOT00000022290	Sned1-201	ENSRNOG00000023548	Sned1	9:100380515-100437056	0.21994	3.75996	-3.29031	0.00250559	0.0400917
ENSRNOT00000000886	Coro1c-201	ENSRNOG00000000697	Coro1c	12:48481750-48554052	82.3148	36.6699	1.9736	0.00250923	0.0401259
ENSRNOT00000015240	Uba5-201	ENSRNOG00000011027	Uba5	8:112578590-112594261	16.2045	4.23812	2.74131	0.00251923	0.0402618
ENSRNOT00000023429	Raly-201	ENSRNOG00000017405	Raly	3:150323116-150386119	21.5256	8.28734	2.17905	0.00252323	0.0402976
ENSRNOT00000025093	Ptma-201	ENSRNOG00000018584	Ptma	9:93545396-93549436	126.218	39.0363	2.49568	0.00252397	0.0402976
ENSRNOT00000003969	Tnfsf4-201	ENSRNOG00000002968	Tnfsf4	13:79269973-79293778	0	0.131932	-10.1343	0.00252448	0.0402976
ENSRNOT00000017658	Esyt3-201	ENSRNOG00000022704	Esyt3	8:107555277-107602263	0.0296533	0	9.78297	0.00253761	0.040483
ENSRNOT00000071897	LOC498276-202	ENSRNOG00000046663	LOC498276	13:91188847-91229066	0	0.262177	-11.9088	0.0025604	0.0407736
ENSRNOT00000071930	Sinhcaf-201	ENSRNOG00000049943	Sinhcaf	4:183403000-183424449	0.275589	0	11.8313	0.00256536	0.0408284
ENSRNOT00000006361	Nsf-201	ENSRNOG00000003905	Nsf	10:91878633-92008082	11.3149	4.53657	2.12329	0.00257765	0.0409874
ENSRNOT00000006777	Gpm6b-201	ENSRNOG00000004613	Gpm6b	X:29607075-29648403	72.706	485.569	-1.93561	0.002589	0.0411313
ENSRNOT00000027275	Gdf1-201	ENSRNOG00000020142	Gdf1	16:20845576-20860767	8.35254	74.9556	-2.35675	0.00259392	0.0411671
ENSRNOT00000045063	Clstn1-201	ENSRNOG00000016398	Clstn1	5:166533181-166601684	94.2161	42.6698	1.95057	0.00259434	0.0411671
ENSRNOT00000074985	Plaur-201	ENSRNOG00000037931	Plaur	1:81328183-81344705	1.63279	0	13.9707	0.00260085	0.041246
ENSRNOT00000020478	Pdia3-201	ENSRNOG00000015018	Pdia3	3:113376983-113400707	299.65	133.16	1.97502	0.00260244	0.041259
ENSRNOT00000002075	Itga6-201	ENSRNOG00000001518	Itga6	3:58443101-58515124	50.8545	22.571	1.97693	0.00261252	0.0413943
ENSRNOT00000089978	Mrps18b-205	ENSRNOG00000000804	Mrps18b	20:3344921-3350435	0.237167	0	9.69538	0.00262467	0.0415622
ENSRNOT00000080520	Efemp2-203	ENSRNOG00000020587	Efemp2	1:220854403-220861420	134.694	49.8681	2.24002	0.00263254	0.0416745
ENSRNOT00000084594	Fhl1-204	ENSRNOG00000000875	Fhl1	X:159112880-159172518	331.516	148.275	1.97118	0.00265003	0.0418647
ENSRNOT00000044788	Ppp1r15a-201	ENSRNOG00000020938	Ppp1r15a	1:101511901-101514974	8.88936	0.284132	5.71679	0.0026546	0.0419121
ENSRNOT00000020509	Zc3h4-201	ENSRNOG00000015229	Zc3h4	1:78354934-78390907	8.87768	1.77956	3.14502	0.00266237	0.0419977
ENSRNOT00000078947	Arfgap3-202	ENSRNOG00000046472	Arfgap3	7:124150688-124198200	19.7064	7.25696	2.24564	0.00266863	0.0420839
ENSRNOT00000074587	Setdb2-203	ENSRNOG00000021680	Setdb2	15:39712861-39742103	0.005682	1.54046	-7.15869	0.00267495	0.0421566
ENSRNOT00000006070	Dcn-201	ENSRNOG00000004554	Dcn	7:38742051-38782323	0.0981973	2.75102	-3.98588	0.0026756	0.0421566
ENSRNOT00000089540	P3h2-201	ENSRNOG00000055751	P3h2	11:78029038-78169648	8.46526	3.26306	2.18102	0.00268586	0.0422934
ENSRNOT00000021842	Ccl17-201	ENSRNOG00000016278	Ccl17	19:10619220-10620671	0	1.71698	-9.802	0.00269933	0.0424805
ENSRNOT00000038188	Hsd17b13-201	ENSRNOG00000002212	Hsd17b13	14:7113544-7128218	0.0990307	0	9.87355	0.0027035	0.0425336
ENSRNOT00000024648	Arl6ip1-201	ENSRNOG00000017751	Arl6ip1	1:187770160-187779675	56.3803	403.723	-2.03209	0.00271344	0.0426525
ENSRNOT00000066139	Kank4-201	ENSRNOG00000007779	Kank4	5:117376423-117440254	4.62502	1.27709	2.6512	0.00272821	0.0428594
ENSRNOT00000058834	Adgrg2-203	ENSRNOG00000032472	Adgrg2	X:36930186-37003642	0.11173	0	12.3532	0.0027335	0.0429299
ENSRNOT00000026202	Sf3a2-201	ENSRNOG00000019349	Sf3a2	7:11777826-11783849	12.816	1.7435	3.68109	0.00274878	0.0431446
ENSRNOT00000012700	Fgf7-201	ENSRNOG00000009425	Fgf7	3:118317761-118366872	0	0.225845	-11.9465	0.00275533	0.0432094
ENSRNOT00000024012	Wdr1-201	ENSRNOG00000028498	Wdr1	14:76989919-77023726	334.593	154.721	1.92148	0.00275817	0.0432413
ENSRNOT00000018101	Rassf4-201	ENSRNOG00000013526	Rassf4	4:148769096-148803988	118.505	53.04	1.96517	0.00277677	0.0434947
ENSRNOT00000088988	Csf1r-203	ENSRNOG00000018414	Csf1r	18:56414488-56446303	0	0.437683	-12.2632	0.00278061	0.0435314
ENSRNOT00000076787	Krt32-202	ENSRNOG00000013611	Krt32	10:87993551-88000423	0.185183	8.22866	-4.63894	0.00280717	0.043868
ENSRNOT00000018225	AABR07065602.1-201	ENSRNOG00000028650	AABR07065602.1	6:137164535-137177622	40.1141	13.3313	2.39823	0.00281357	0.0439323
ENSRNOT00000004161	Dph1-202	ENSRNOG00000003116	Dph1	10:62020320-62032400	0.477144	0	11.7771	0.00281594	0.0439538
ENSRNOT00000078643	Arid4b-202	ENSRNOG00000016391	Arid4b	17:53629839-53688966	1.43553	0.203123	3.61336	0.00282449	0.0440745
ENSRNOT00000017387	Dnajc5b-201	ENSRNOG00000012851	Dnajc5b	2:104290726-104382878	0.0631723	0	11.8668	0.00282738	0.0440997
ENSRNOT00000008303	Wiz-201	ENSRNOG00000006217	Wiz	7:14374358-14402010	4.36099	0.659444	3.51669	0.00284387	0.0442994
ENSRNOT00000088508	Slc10a6-202	ENSRNOG00000002057	Slc10a6	14:7618022-7682374	0.09457	0	11.9602	0.00285049	0.0443637
ENSRNOT00000021840	Igf2r-201	ENSRNOG00000014997	Igf2r	1:48176106-48264477	43.8015	19.7423	1.95758	0.00285237	0.0443801
ENSRNOT00000077441	Slc28a1-202	ENSRNOG00000018940	Slc28a1	1:142951094-142992615	0.038006	0	9.92744	0.00286148	0.0445089
ENSRNOT00000057213	Numbl-201	ENSRNOG00000020867	Numbl	1:84067938-84091659	40.2385	14.1105	2.31337	0.00286554	0.0445312
ENSRNOT00000089840	Slc24a4-203	ENSRNOG00000006729	Slc24a4	6:126018841-126153437	0.580878	5.74005	-2.49361	0.00286875	0.0445443
ENSRNOT00000012195	Slitrk1-201	ENSRNOG00000009209	Slitrk1	15:93303382-93307420	0.001225	0.963603	-8.33303	0.0028783	0.0446796
ENSRNOT00000081924	Hspa1b-201	ENSRNOG00000050647	Hspa1b	20:4877324-4879779	11.276	0.748385	4.71354	0.0028807	0.0447039
ENSRNOT00000017479	Nkain3-201	ENSRNOG00000013085	Nkain3	5:34174411-34813116	0.343658	0.00587667	6.67463	0.00289591	0.0448577
ENSRNOT00000035948	RGD1565611-201	ENSRNOG00000025287	RGD1565611	10:64174931-64178591	0	0.628463	-9.70945	0.00289648	0.0448577
ENSRNOT00000036232	Syt7-205	ENSRNOG00000026432	Syt7	1:226436090-226493377	0.085697	5.18653	-5.06318	0.00290299	0.0449325
ENSRNOT00000007466	Fam110c-201	ENSRNOG00000005660	Fam110c	6:49968473-49974728	1.19998	0.00725767	7.88233	0.00290784	0.0449935
ENSRNOT00000008481	Gip-201	ENSRNOG00000006306	Gip	10:83840303-83848396	0.165087	0	9.74166	0.00291739	0.0450772
ENSRNOT00000087445	Kcnq4-201	ENSRNOG00000060435	Kcnq4	5:139627576-139677300	0	0.199796	-11.799	0.00292481	0.0451787
ENSRNOT00000081023	Fat1-202	ENSRNOG00000030954	Fat1	16:50372128-50501921	22.5415	7.48707	2.36234	0.00294985	0.0454836
ENSRNOT00000080215	Myoz2-202	ENSRNOG00000014815	Myoz2	2:227180886-227207635	0.0471283	0	9.66147	0.00295667	0.0455657
ENSRNOT00000036180	Syt7-204	ENSRNOG00000026432	Syt7	1:226436139-226493179	0	0.81078	-14.0169	0.00296486	0.0456394
ENSRNOT00000032792	Snap91-201	ENSRNOG00000023861	Snap91	8:94453483-94563760	0.000176333	0.102353	-8.1455	0.00297635	0.0457768
ENSRNOT00000028060	Rpl27-201	ENSRNOG00000020674	Rpl27	10:89352835-89356547	353.004	132.533	2.21383	0.00297977	0.0458162
ENSRNOT00000036483	Suco-201	ENSRNOG00000026542	Suco	13:79737839-79801116	0.0219813	0	9.78449	0.00298384	0.0458397
ENSRNOT00000071332	LOC687399-201	ENSRNOG00000045541	LOC687399	19:49508594-49518721	0.49099	0	11.6553	0.00298402	0.0458397
ENSRNOT00000029184	Ccl9-201	ENSRNOG00000028548	Ccl9	10:70783424-70788309	0	0.465139	-9.67559	0.00298472	0.0458397
ENSRNOT00000022833	Pstpip2-201	ENSRNOG00000016987	Pstpip2	18:74174936-74292921	0.0457823	1.09807	-3.80258	0.002988	0.0458769
ENSRNOT00000079535	Myo5a-201	ENSRNOG00000058866	Myo5a	8:82038967-82156504	0.650651	9.18867	-2.99316	0.00299413	0.0459447
ENSRNOT00000077005	Eif4e2-203	ENSRNOG00000019634	Eif4e2	9:94316717-94325452	12.0127	1.62514	3.66714	0.00299853	0.0459726
ENSRNOT00000028570	Sult2b1-201	ENSRNOG00000021046	Sult2b1	1:101712255-101741441	0.178078	0	11.646	0.00300579	0.0460443
ENSRNOT00000082191	Lcp1-202	ENSRNOG00000010319	Lcp1	15:57241968-57277811	0.13821	0	11.6442	0.00301015	0.0460848
ENSRNOT00000046529	Nav2-201	ENSRNOG00000014530	Nav2	1:104576589-104941552	22.8513	10.5545	1.91796	0.00301367	0.0461122
ENSRNOT00000086468	Ramp3-201	ENSRNOG00000053766	Ramp3	14:86922223-86939719	1.94426	22.5542	-2.73507	0.00301489	0.0461144
ENSRNOT00000077502	Prkag1-201	ENSRNOG00000061499	Prkag1	7:140489492-140546908	14.4005	5.22919	2.27197	0.00302789	0.0462637
ENSRNOT00000088686	Gask1b-202	ENSRNOG00000010183	Gask1b	2:178679395-178750668	21.7175	8.96191	2.08526	0.00303738	0.0463822
ENSRNOT00000014802	Akap13-201	ENSRNOG00000010964	Akap13	1:137014272-137315272	14.2293	6.47521	1.93914	0.00304833	0.0464793
ENSRNOT00000022095	Clu-201	ENSRNOG00000016460	Clu	15:42653148-42665857	59.197	410.699	-1.98802	0.00305171	0.0464949
ENSRNOT00000015778	Fbxo34-201	ENSRNOG00000011704	Fbxo34	15:24267323-24334885	0.326822	0	13.7817	0.00305282	0.0464986
TCONS_00301401	TCONS_00301401	XLOC_239135	XLOC_239135	5:3399006-3404207	0	0.448945	-9.72927	0.00305748	0.0465431
ENSRNOT00000093486	Fam160a1-205	ENSRNOG00000048256	Fam160a1	2:184942595-184951950	0.130234	0	9.5869	0.00306011	0.0465566
ENSRNOT00000017466	Sapcd2-201	ENSRNOG00000013069	Sapcd2	3:2591331-2596583	2.54821	42.0381	-3.23533	0.00307052	0.046668
ENSRNOT00000013308	Clec4a3-201	ENSRNOG00000010018	Clec4a3	4:155913366-155923079	0	0.967783	-11.7362	0.00307179	0.046668
ENSRNOT00000087397	Unc5a-201	ENSRNOG00000059840	Unc5a	17:10153994-10208360	0.0204993	0.937584	-4.70653	0.00307377	0.0466848
ENSRNOT00000091095	Tes-201	ENSRNOG00000051952	Tes	4:44321883-44360405	29.094	11.3338	2.16283	0.00307888	0.0467359
ENSRNOT00000020702	Dnajc25-201	ENSRNOG00000015340	Dnajc25	5:76150840-76171423	10.4266	2.59744	2.80494	0.00308224	0.0467604
ENSRNOT00000039237	Vxn-201	ENSRNOG00000021663	Vxn	5:9355507-9381214	1.83603	19.7385	-2.63116	0.00308472	0.0467848
ENSRNOT00000024885	Tln2-202	ENSRNOG00000018373	Tln2	8:73014137-73194837	13.0569	4.13491	2.4658	0.00309663	0.0469521
ENSRNOT00000078806	Vcam1-203	ENSRNOG00000014333	Vcam1	2:219071193-219097619	1.27708	15.0162	-2.76657	0.00309985	0.0469743
ENSRNOT00000005902	Ikzf1-201	ENSRNOG00000004444	Ikzf1	14:91782354-91867424	0	0.109103	-11.72	0.00310309	0.0469977
ENSRNOT00000047512	Adarb2-201	ENSRNOG00000030775	Adarb2	17:58104602-58292624	0	0.238872	-13.9747	0.00310332	0.0469977
ENSRNOT00000012646	Gripap1-201	ENSRNOG00000009071	Gripap1	X:15523929-15553720	6.23495	1.44753	2.90274	0.00310403	0.0469977
ENSRNOT00000000597	Def6-201	ENSRNOG00000000502	Def6	20:7788084-7809560	2.60534	0.29359	3.96031	0.00311405	0.0471095
ENSRNOT00000017798	Sh2d2a-201	ENSRNOG00000013294	Sh2d2a	2:187218851-187225002	0.206396	0	9.68027	0.00311628	0.0471164
ENSRNOT00000089177	Shq1-202	ENSRNOG00000005433	Shq1	4:133037014-133131953	0.00139033	0.408059	-7.30869	0.00311706	0.0471164
ENSRNOT00000078445	Med13l-202	ENSRNOG00000001120	Med13l	12:43421308-43503456	18.4249	7.6231	2.08039	0.0031347	0.0473282
ENSRNOT00000001331	Nptx2-201	ENSRNOG00000001006	Nptx2	12:12013911-12025549	0.108282	4.76036	-4.6264	0.00314068	0.0473987
ENSRNOT00000044896	Ephb3-201	ENSRNOG00000031801	Ephb3	11:83527962-83546674	10.626	2.65203	2.80691	0.00314114	0.0473987
ENSRNOT00000006849	Vangl2-201	ENSRNOG00000004889	Vangl2	13:90381998-90405591	1.97374	21.0813	-2.61212	0.00314754	0.0474551
ENSRNOT00000089841	Atf3-202	ENSRNOG00000003745	Atf3	13:109817728-109844359	0.103003	4.08798	-4.49759	0.00315313	0.0475127
ENSRNOT00000087834	Tspan11-201	ENSRNOG00000054360	Tspan11	4:160455986-160522904	25.0225	10.3759	2.07907	0.00316287	0.0476228
ENSRNOT00000046330	Morc1-201	ENSRNOG00000032101	Morc1	11:54762654-55044581	0.0169693	0	11.593	0.00316311	0.0476228
ENSRNOT00000044532	Mag-202	ENSRNOG00000021023	Mag	1:89345748-89358166	0.00161533	0.997244	-8.26888	0.00316617	0.0476555
ENSRNOT00000013694	Lef1-201	ENSRNOG00000010121	Lef1	2:236233239-236345056	0.150595	2.28594	-3.13975	0.00316969	0.0476635
ENSRNOT00000010606	Wbp2nl-201	ENSRNOG00000008038	Wbp2nl	7:123531682-123548081	0	0.147479	-9.78228	0.00317026	0.0476635
ENSRNOT00000019573	Cfap53-201	ENSRNOG00000014585	Cfap53	18:70263359-70329907	0.004903	1.10029	-6.97456	0.00317398	0.047684
ENSRNOT00000080254	Tnr-204	ENSRNOG00000002468	Tnr	13:77485113-77676362	6.25435	41.8197	-1.93734	0.00317556	0.047684
ENSRNOT00000023117	Hydin-201	ENSRNOG00000017178	Hydin	19:41036510-41161765	0	0.341415	-13.951	0.0031765	0.047684
ENSRNOT00000035382	Arhgap9-201	ENSRNOG00000006946	Arhgap9	7:70614617-70620890	0	0.388412	-9.7665	0.00317925	0.047684
ENSRNOT00000007724	Oxtr-201	ENSRNOG00000005806	Oxtr	4:144403358-144416116	4.51951	0.149492	5.73926	0.00317941	0.047684
ENSRNOT00000090780	Mcam-202	ENSRNOG00000007726	Mcam	8:48472824-48481001	12.2065	0.199955	6.74223	0.00317952	0.047684
ENSRNOT00000021041	Tectb-201	ENSRNOG00000015671	Tectb	1:275957698-275976572	0	0.146481	-9.94445	0.00317965	0.047684
ENSRNOT00000051207	LOC108349606-201	ENSRNOG00000031244	LOC108349606	18:4371051-4371899	198.285	43.418	2.99106	0.00318897	0.047797
ENSRNOT00000049582	Ryr3-202	ENSRNOG00000006645	Ryr3	3:104118063-104504204	0.0857477	1.02195	-2.75513	0.00319212	0.0478206
ENSRNOT00000086646	Arap2-203	ENSRNOG00000056826	Arap2	14:48726045-48922807	0.139988	1.77912	-2.87659	0.00319313	0.0478206
ENSRNOT00000090366	Epb41l4b-202	ENSRNOG00000056550	Epb41l4b	5:74030882-74190991	0.00789267	0.328929	-4.56098	0.00320007	0.0478454
ENSRNOT00000026870	Sh3gl3-201	ENSRNOG00000019776	Sh3gl3	1:144069638-144200029	0.16286	0	13.7254	0.00320079	0.0478454
ENSRNOT00000003984	Ndp-201	ENSRNOG00000002960	Ndp	X:6791136-6815583	1.85735	19.6405	-2.59657	0.00322351	0.0481305
ENSRNOT00000093285	Fhod3-204	ENSRNOG00000027230	Fhod3	18:17091310-17332205	2.13469	16.2463	-2.1221	0.00322662	0.048159
ENSRNOT00000078645	Calcrl-201	ENSRNOG00000054695	Calcrl	3:71750500-71845232	0.0374693	1.44766	-4.48496	0.00322974	0.0481922
ENSRNOT00000084055	Usp36-202	ENSRNOG00000028255	Usp36	10:107295550-107314496	3.612	0.477634	3.72021	0.00323963	0.0482994
ENSRNOT00000091116	LOC108348083-201	ENSRNOG00000060047	LOC108348083	1:259641676-259674425	38.8561	15.7756	2.10945	0.00324093	0.0483052
ENSRNOT00000038872	Bmp3-201	ENSRNOG00000002381	Bmp3	14:12359363-12387102	2.30697	0.281922	3.82324	0.00324578	0.0483642
ENSRNOT00000024831	Smad7-201	ENSRNOG00000018359	Smad7	18:71395830-71424157	29.7443	11.1673	2.21592	0.00325555	0.0484558
ENSRNOT00000081758	Sp7-202	ENSRNOG00000014082	Sp7	7:143958858-143967484	0	0.246581	-9.58131	0.00325696	0.0484632
ENSRNOT00000091936	AC103535.1-201	ENSRNOG00000053840	AC103535.1	14:16990629-16996962	0	0.368946	-9.74357	0.00325858	0.0484739
TCONS_00417461	TCONS_00417461	XLOC_332582	XLOC_332582	X:46701678-46825233	0	0.349703	-13.9189	0.00326759	0.0485674
ENSRNOT00000093489	Arid3a-204	ENSRNOG00000026435	Arid3a	7:12597640-12601674	0.526452	0	10.3245	0.00326945	0.0485804
ENSRNOT00000047936	Rpl21-203	ENSRNOG00000032803	Rpl21	X:10430847-10431400	104.461	12.0683	3.92217	0.00327028	0.0485804
ENSRNOT00000030341	Tnni3k-201	ENSRNOG00000028225	Tnni3k	2:261069203-261337163	0	0.0338313	-11.6659	0.00328472	0.0487272
ENSRNOT00000003979	Spata46-201	ENSRNOG00000002972	Spata46	13:88644520-88648145	0	0.704123	-9.84109	0.00329064	0.048761
ENSRNOT00000086433	Hdlbp-203	ENSRNOG00000031479	Hdlbp	9:100576070-100592271	16.2042	4.5113	2.6519	0.00329719	0.0488213
ENSRNOT00000028010	Zbtb7b-201	ENSRNOG00000020640	Zbtb7b	2:188704687-188718704	27.3707	8.49793	2.49234	0.00330223	0.0488651
ENSRNOT00000086847	Fscn1-201	ENSRNOG00000056585	Fscn1	12:13656554-13668515	13.6037	3.04262	2.96536	0.00330407	0.0488653
ENSRNOT00000065168	Mpped2-201	ENSRNOG00000004863	Mpped2	3:97721668-97896422	19.2523	8.73937	1.94605	0.00331955	0.0490807
ENSRNOT00000017169	Col19a1-201	ENSRNOG00000012759	Col19a1	9:30515089-30844199	0.015291	0	11.6626	0.00332286	0.0491161
ENSRNOT00000064779	Gabra2-202	ENSRNOG00000002349	Gabra2	14:39661968-39798302	0.307882	3.41045	-2.67046	0.00332531	0.0491353
ENSRNOT00000008329	Sec61b-201	ENSRNOG00000006345	Sec61b	5:63192298-63200508	111.128	41.9212	2.21075	0.00332987	0.0491654
ENSRNOT00000090819	Rps9l1-202	ENSRNOG00000058909	Rps9l1	1:64018398-64021321	200.506	68.0631	2.36104	0.00333555	0.04922
ENSRNOT00000057222	Rpl36a-201	ENSRNOG00000011494	Rpl36a	X:105402867-105405580	116.687	30.8771	2.7128	0.00333966	0.0492499
ENSRNOT00000051846	Cacna1c-202	ENSRNOG00000007090	Cacna1c	4:150641066-150829741	0.312053	3.40237	-2.64362	0.00334019	0.0492499
ENSRNOT00000075306	LOC100912571-201	ENSRNOG00000049598	LOC100912571	11:82886878-82893845	48.6074	14.7568	2.5211	0.00334166	0.0492563
ENSRNOT00000003633	Abat-201	ENSRNOG00000002636	Abat	10:7093405-7200499	0.744952	7.13512	-2.45263	0.00334339	0.0492563
ENSRNOT00000089897	Phf14-203	ENSRNOG00000005775	Phf14	4:38255413-38420205	1.96334	0.196121	4.18877	0.00334483	0.049264
ENSRNOT00000006401	Ptprr-201	ENSRNOG00000004483	Ptprr	7:59039720-59325947	0.005647	0.420254	-5.37601	0.0033473	0.0492869
ENSRNOT00000018021	Iqgap1-201	ENSRNOG00000012002	Iqgap1	1:142525046-142615673	48.3832	22.2739	1.92416	0.00335568	0.0493831
ENSRNOT00000067574	Arhgef19-201	ENSRNOG00000047967	Arhgef19	5:159755535-159773699	15.7152	4.51989	2.60703	0.00336175	0.0494391
ENSRNOT00000024712	Ncl-201	ENSRNOG00000018273	Ncl	9:93368932-93377643	24.7678	6.54199	2.72803	0.00336524	0.0494632
ENSRNOT00000033233	Ano7-201	ENSRNOG00000023427	Ano7	9:100511610-100551798	0.0372833	0	9.92584	0.00336789	0.0494811
ENSRNOT00000012017	Chst11-201	ENSRNOG00000008885	Chst11	7:26645422-26859716	19.5134	8.93891	1.93142	0.0033767	0.0495833
ENSRNOT00000077598	Ankrd33b-202	ENSRNOG00000010888	Ankrd33b	2:84361207-84437084	0	0.115016	-11.5991	0.00340017	0.0498732
ENSRNOT00000009840	Trib3-201	ENSRNOG00000007319	Trib3	3:147813473-147819571	11.8727	1.6651	3.63595	0.00340279	0.0498979
